# Supplementary material for: Studies of Glyoxalase 1-Linked Multidrug Resistance Reveal Glycolysis-Derived Reactive Metabolite, Methylglyoxal, Is a Common Contributor in Cancer Chemotherapy Targeting the Spliceosome
Source: PubMed Central journal article supplement (PMC8591171; doi:10.3389/fonc.2021.748698), 2021-11-01
Supplement: DataSheet_1.pdf [file DataSheet_1.pdf]

**Studies of glyoxalase 1-linked multidrug resistance reveal glycolysis-derived reactive metabolite, methylglyoxal, is a common contributor in cancer chemotherapy targeting the spliceosome.**

Muhanad Alhujaily et al.

**Figure S1.** The effect of the anti-cancer drugs on Glo1 activity of HEK293 cell lysates. Anticancer drugs were added to diluted cytosolic extracts of HEK293 cells and activity of glyoxalase 1 assayed as described [1]. Data are mean  $\pm$  SD ( $n = 4$  for control and  $n = 3$  for drug treated). Significance: \* and \*\*,  $P < 0.05$  and  $P < 0.05$ , with respect to control; *Student's t-test*. Key for drug concentrations: , + GC<sub>50</sub>; , + 2 x GC<sub>50</sub>; and , + 5 x GC<sub>50</sub>.

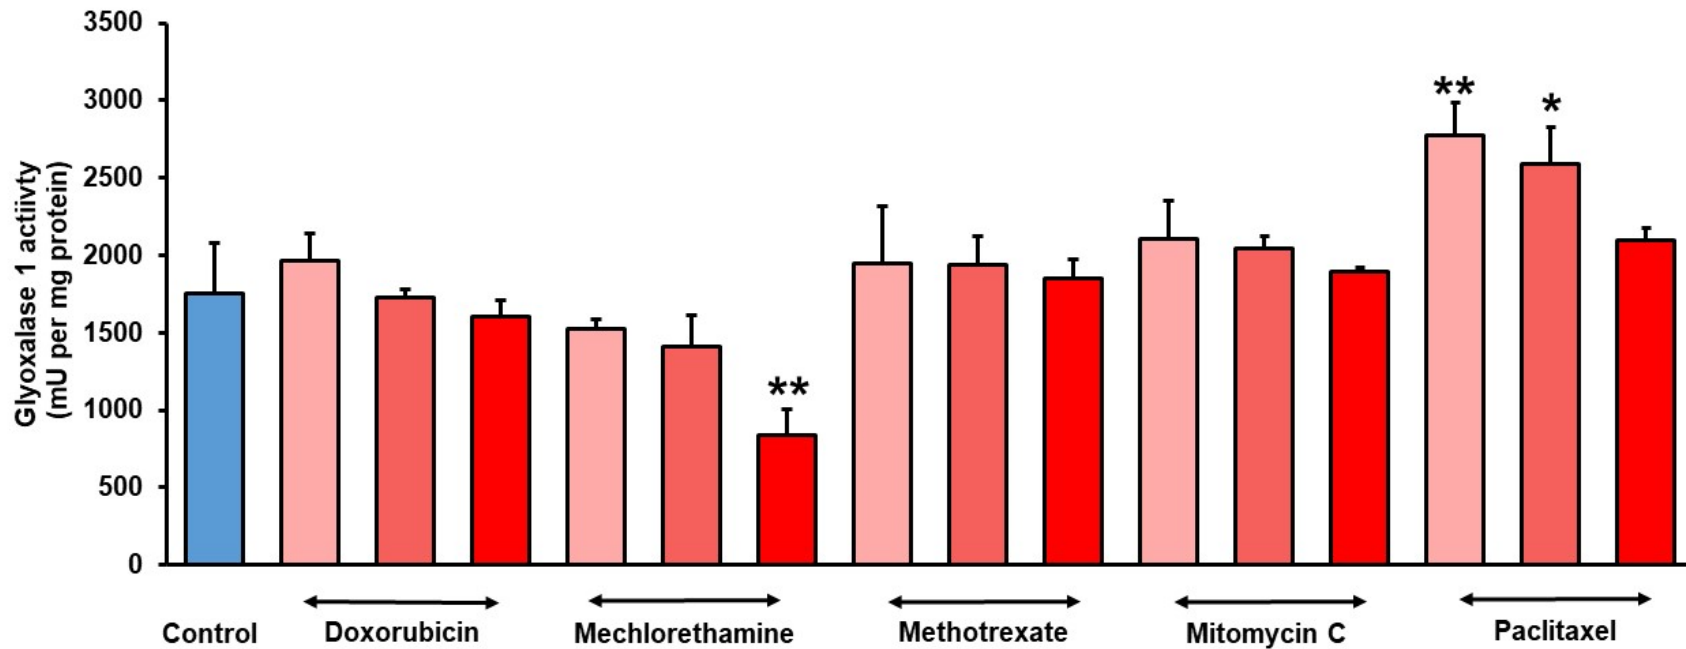

**Studies of glyoxalase 1-linked multidrug resistance reveal glycolysis-derived reactive metabolite, methylglyoxal, is a common contributor in cancer chemotherapy targeting the spliceosome.**

Muhanad Alhujaily et al.

**Table S1. Proteins in the cytoplasmic extract increased in abundance by treatment with methylglyoxal.**

| No | Gene      | Name of protein                                                          | Fold change |
|----|-----------|--------------------------------------------------------------------------|-------------|
| 1  | TMEM63B   | CSC1-like protein 2                                                      | 30.5        |
| 2  | MEGF11    | Multiple epidermal growth factor-like domains protein 11                 | 14.0        |
| 3  | TMEM259   | Membralin                                                                | 8.2         |
| 4  | TSTA3     | GDP-L-fucose synthase                                                    | 5.7         |
| 5  | CORO1C    | Coronin                                                                  | 5.2         |
| 6  | EIF4E     | Eukaryotic translation initiation factor 4E                              | 5.1         |
| 7  | LSM7      | U6 snRNA-associated Sm-like protein LSm7                                 | 4.9         |
| 8  | TMEM132B  | Transmembrane protein 132B                                               | 4.8         |
| 9  | NIN       | Ninein                                                                   | 4.8         |
| 10 | UBL5      | Ubiquitin-like protein 5                                                 | 4.4         |
| 11 | NLRP2     | NACHT, LRR and PYD domains-containing protein 2                          | 4.1         |
| 12 | TUB       | Tubby-like protein                                                       | 3.9         |
| 13 | TSPYL2    | Testis-specific Y-encoded-like protein 2                                 | 3.8         |
| 14 | TRIM52    | Tripartite motif-containing protein 52                                   | 3.6         |
| 15 | CHMP2A    | Charged multivesicular body protein 2a                                   | 3.5         |
| 16 | GC        | Vitamin D-binding protein                                                | 3.5         |
| 17 | C5        | Complement C5                                                            | 3.5         |
| 18 | GPR119    | Glucose-dependent insulinotropic receptor                                | 3.4         |
| 19 | KRT9      | Keratin, type I cytoskeletal 9                                           | 3.3         |
| 20 | ABHD12B   | Protein ABHD12B                                                          | 3.2         |
| 21 | CACNA1H   | Voltage-dependent T-type calcium channel subunit alpha-1H                | 3.2         |
| 22 | SV2B      | Synaptic vesicle glycoprotein 2B                                         | 3.2         |
| 23 | PHF5A     | PHD finger-like domain-containing protein 5A                             | 3.0         |
| 24 | CTSB CPSB | Cathepsin B                                                              | 2.9         |
| 25 | NUP50     | Nuclear pore complex protein Nup50                                       | 2.8         |
| 26 |           | Uncharacterized protein                                                  | 2.8         |
| 27 | THRA      | Thyroid hormone receptor alpha                                           | 2.7         |
| 28 | KIAA0355  | Uncharacterized protein KIAA0355                                         | 2.6         |
| 29 | COQ9      | Ubiquinone biosynthesis protein COQ9, mitochondrial                      | 2.6         |
| 30 | FAAP20    | Fanconi anemia core complex-associated protein 20                        | 2.6         |
| 31 | REXO2     | Oligoribonuclease, mitochondrial                                         | 2.4         |
| 32 | CIITA     | MHC class II transactivator                                              | 2.4         |
| 33 | DROSHA    | Ribonuclease 3                                                           | 2.4         |
| 34 | VAT1      | Synaptic vesicle membrane protein VAT-1 homolog                          | 2.3         |
| 35 | MZT2A     | Mitotic-spindle organizing protein 2A                                    | 2.3         |
| 36 | PPARD     | Peroxisome proliferator-activated receptor delta                         | 2.2         |
| 37 | CKS2      | Cyclin-dependent kinases regulatory subunit 2                            | 2.2         |
| 38 | MRPL1     | 39S ribosomal protein L1, mitochondrial                                  | 2.1         |
| 39 | ZNF568    | Zinc finger protein 568                                                  | 2.1         |
| 40 | BRCA2     | Breast cancer type 2 susceptibility protein                              | 2.1         |
| 41 | MXRA7     | HBV PreS1-transactivated protein 1                                       | 2.1         |
| 42 | HIBADH    | 3-hydroxyisobutyrate dehydrogenase, mitochondrial                        | 2.1         |
| 43 | PTPRN2    | Receptor-type tyrosine-protein phosphatase N2                            | 2.1         |
| 44 | SLC25A37  | Mitoferrin-1                                                             | 2.1         |
| 45 | METAP1    | Methionine aminopeptidase 1                                              | 2.1         |
| 46 | SCAPER    | S phase cyclin A-associated protein in the ER                            | 2.1         |
| 47 | SDHA      | Succinate dehydrogenase [ubiquinone] flavoprotein subunit, mitochondrial | 2.1         |
| 48 | GGCT      | Gamma-glutamylcyclotransferase                                           | 2.1         |
| 49 | NIPBL     | Nipped-B-like protein                                                    | 2.0         |

|     |           |                                                                           |     |
|-----|-----------|---------------------------------------------------------------------------|-----|
| 50  | TUBGCP6   | Gamma-tubulin complex component 6                                         | 2.0 |
| 51  | UNG       | Uracil-DNA glycosylase                                                    | 2.0 |
| 52  | COL4A4    | Collagen alpha-4                                                          | 2.0 |
| 53  | CLN5      | Ceroid-lipofuscinosis neuronal protein 5                                  | 2.0 |
| 54  | MACF1     | Microtubule-actin cross-linking factor 1, isoforms 1/2/3/5                | 2.0 |
| 55  | CRABP2    | Cellular retinoic acid-binding protein 2                                  | 2.0 |
| 56  | TSFM      | Elongation factor Ts, mitochondrial                                       | 2.0 |
| 57  | COL27A1   | Collagen alpha-1                                                          | 2.0 |
| 58  | MECP2     | Methyl-CpG-binding protein 2                                              | 1.9 |
| 59  | CCNDBP1   | Cyclin-D1-binding protein 1                                               | 1.9 |
| 60  | PLCB1     | 1-phosphatidylinositol 4,5-bisphosphate phosphodiesterase                 | 1.9 |
| 61  | SERPINA7  | Thyroxine-binding globulin                                                | 1.9 |
| 62  | ZSWIM9    | Uncharacterized protein ZSWIM9                                            | 1.9 |
| 63  | CCDC8     | Coiled-coil domain-containing protein 8                                   | 1.9 |
| 64  | IWS1      | Protein IWS1 homolog                                                      | 1.9 |
| 65  | SPTA1     | Spectrin alpha chain, erythrocytic 1                                      | 1.8 |
| 66  | SEMA4B    | Semaphorin-4B                                                             | 1.8 |
| 67  | CPEB1     | Cytoplasmic polyadenylation element binding protein 1, isoform CRA_c      | 1.8 |
| 68  | CRELD2    | Cysteine-rich with EGF-like domain protein 2                              | 1.8 |
| 69  | UNC13B    | Protein unc-13 homolog B                                                  | 1.8 |
| 70  | SEPTIN9   | Septin 9                                                                  | 1.8 |
| 71  | A2M       | Alpha-2-macroglobulin                                                     | 1.8 |
| 72  | CABIN1    | Calcineurin-binding protein cabin-1                                       | 1.8 |
| 73  | ZNF622    | Zinc finger protein 622                                                   | 1.8 |
| 74  | YARS2     | Tyrosine-tRNA ligase                                                      | 1.8 |
| 75  | MBOAT7    | Lysophospholipid acyltransferase 7                                        | 1.8 |
| 76  | LRBA      | Lipopolysaccharide-responsive and beige-like anchor protein               | 1.7 |
| 77  | SLC6A9    | Transporter                                                               | 1.7 |
| 78  | ARMH3     | Armadillo-like helical domain-containing protein 3                        | 1.7 |
| 79  | NPEPPS    | Puromycin-sensitive aminopeptidase                                        | 1.7 |
| 80  | MYEF2     | Myelin expression factor 2                                                | 1.7 |
| 81  | TMPRSS11B | Transmembrane protease serine 11B                                         | 1.7 |
| 82  | MDC1      | Mediator of DNA damage checkpoint protein 1                               | 1.6 |
| 83  | UBQLN1    | Ubiquilin-1                                                               | 1.6 |
| 84  | MUC20     | Mucin-20                                                                  | 1.6 |
| 85  | SPRED2    | Sprouty-related, EVH1 domain-containing protein 2                         | 1.6 |
| 86  | BUD31     | Protein BUD31 homolog                                                     | 1.6 |
| 87  | SAMD11    | Sterile alpha motif domain-containing protein 11                          | 1.6 |
| 88  | CEP250    | Centrosome-associated protein CEP250                                      | 1.6 |
| 89  | WDR33     | pre-mRNA 3' end processing protein WDR33                                  | 1.6 |
| 90  | CCT7      | T-complex protein 1 subunit eta                                           | 1.5 |
| 91  | SNRPB2    | U2 small nuclear ribonucleoprotein B"                                     | 1.5 |
| 92  | SDHB      | Succinate dehydrogenase [ubiquinone] iron-sulfur subunit, mitochondrial   | 1.5 |
| 93  | PPP4R1L   | Putative serine/threonine-protein phosphatase 4 regulatory subunit 1-like | 1.5 |
| 94  | ALK       | Tyrosine-protein kinase receptor                                          | 1.5 |
| 95  | SNTG2     | Gamma-2-syntrophin                                                        | 1.5 |
| 96  | C20orf27  | UPF0687 protein C20orf27                                                  | 1.5 |
| 97  | EIPR1     | EARP and GARP complex-interacting protein 1                               | 1.5 |
| 98  | DAP3      | 28S ribosomal protein S29, mitochondrial                                  | 1.5 |
| 99  | WDR61     | WD repeat-containing protein 61                                           | 1.5 |
| 100 | DIS3L2    | DIS3-like exonuclease 2                                                   | 1.4 |
| 101 | ALDH3A2   | Fatty aldehyde dehydrogenase                                              | 1.4 |
| 102 | ETS1      | Protein C-ets-1                                                           | 1.4 |
| 103 | DAAM2     | Disheveled-associated activator of morphogenesis 2                        | 1.4 |
| 104 | WNK3      | Serine/threonine-protein kinase WNK3                                      | 1.4 |

|     |         |                                                          |     |
|-----|---------|----------------------------------------------------------|-----|
| 105 | EDC3    | Enhancer of mRNA-decapping protein 3                     | 1.4 |
| 106 | FMN2    | Formin-2                                                 | 1.4 |
| 107 | GRD1    | Glutathione reductase, mitochondrial                     | 1.4 |
| 108 | FAM27E3 | Protein FAM27E3                                          | 1.3 |
| 109 | MRPS9   | 28S ribosomal protein S9, mitochondrial                  | 1.3 |
| 110 | MBNL1   | Muscle blind-like protein 1                              | 1.3 |
| 111 | LMNA    | Prelamin-A/C [Cleaved into: Lamin-A/C                    | 1.3 |
| 112 | WBP11   | WW domain-binding protein 11                             | 1.3 |
| 113 | SMG6    | Telomerase-binding protein EST1A                         | 1.3 |
| 114 | LMNA    | Prelamin-A/C                                             | 1.3 |
| 115 | FABP5   | Fatty acid-binding protein 5                             | 1.2 |
| 116 | RBM14   | RNA-binding protein 14                                   | 1.2 |
| 117 | POM121C | Nuclear envelope pore membrane protein POM 121C          | 1.2 |
| 118 | NFU1    | NFU1 iron-sulfur cluster scaffold homolog, mitochondrial | 1.2 |
| 119 | AKR1B1  | Aldo-keto reductase family 1 member B1                   | 1.2 |
| 120 | TRA2B   | Transformer-2 protein homolog beta                       | 1.2 |
| 121 | NASP    | Nuclear autoantigenic sperm protein                      | 1.2 |

---

**Studies of glyoxalase 1-linked multidrug resistance reveal glycolysis-derived reactive metabolite, methylglyoxal, is a common contributor in cancer chemotherapy targeting the spliceosome.**

Muhanad Alhujaily et al.

**Table S2. Proteins in the cytoplasmic extract decreased in abundance by treatment with methylglyoxal.**

| No | Gene        | Name of protein                                                        | Fold change |
|----|-------------|------------------------------------------------------------------------|-------------|
| 1  | HNRNPK      | Heterogeneous nuclear ribonucleoprotein K                              | 0.91        |
| 2  | GDI1        | Rab GDP dissociation inhibitor alpha                                   | 0.90        |
| 3  | YWHAZ       | 14-3-3 protein zeta/delta                                              | 0.89        |
| 4  | GDI1        | Rab GDP dissociation inhibitor                                         | 0.89        |
| 5  | DDX21       | Nucleolar RNA helicase 2                                               | 0.89        |
| 6  | HSP90B1     | Endoplasmin                                                            | 0.89        |
| 7  | GDI2        | Rab GDP dissociation inhibitor                                         | 0.88        |
| 8  | NPM1        | Nucleophosmin                                                          | 0.88        |
| 9  | NASP        | Nuclear autoantigenic sperm protein                                    | 0.88        |
| 10 | SERBP1      | Plasminogen activator inhibitor 1 RNA-binding protein                  | 0.88        |
| 11 | RTCB        | tRNA-splicing ligase RtcB homolog                                      | 0.88        |
| 12 | ACTN4       | Alpha-actinin-4                                                        | 0.88        |
| 13 | HSPE1       | 10 kDa heat shock protein, mitochondrial                               | 0.87        |
| 14 | SRSF1       | Serine/arginine-rich-splicing factor 1                                 | 0.87        |
| 15 | MYH9        | Myosin-9                                                               | 0.87        |
| 16 | RBM39       | RNA-binding protein 39                                                 | 0.87        |
| 17 | EIF3J       | Eukaryotic translation initiation factor 3 subunit J                   | 0.87        |
| 18 | LMNB1       | Lamin-B1                                                               | 0.87        |
| 19 | EIF4EBP1    | Eukaryotic translation initiation factor 4E-binding protein 1          | 0.87        |
| 20 | CALU        | Calumenin                                                              | 0.87        |
| 21 | SEPT11      | Septin-11                                                              | 0.87        |
| 22 | SRSF6       | Serine/arginine-rich splicing factor 6                                 | 0.86        |
| 23 | ARHGDI1     | Rho GDP-dissociation inhibitor 1                                       | 0.86        |
| 24 | FUS         | RNA-binding protein FUS                                                | 0.86        |
| 25 | CNPY2       | Protein canopy homolog 2                                               | 0.86        |
| 26 | TPR         | Nucleoprotein TPR                                                      | 0.86        |
| 27 | RAB4A       | Ras-related protein Rab-4A                                             | 0.86        |
| 28 | RAN         | GTP-binding nuclear protein Ran                                        | 0.86        |
| 29 | SGTA        | Small glutamine-rich tetratricopeptide repeat-containing protein alpha | 0.86        |
| 30 | RRP1B       | Ribosomal RNA processing protein 1 homolog B                           | 0.86        |
| 31 | PCBD1       | Pterin-4-alpha-carbinolamine dehydratase                               | 0.86        |
| 32 | RPS14       | 40S ribosomal protein S14                                              | 0.86        |
| 33 | FTSJ3       | pre-rRNA processing protein FTSJ3                                      | 0.85        |
| 34 | RPS10P5     | Putative 40S ribosomal protein S10-like                                | 0.85        |
| 35 | RPLP2       | 60S acidic ribosomal protein P2                                        | 0.85        |
| 36 | H2AFY       | Core histone macro-H2A.1                                               | 0.85        |
| 37 | TPP2        | Tripeptidyl-peptidase 2                                                | 0.85        |
| 38 | PPA1        | Inorganic pyrophosphatase                                              | 0.85        |
| 39 | RCC2        | Protein RCC2                                                           | 0.85        |
| 40 | CYFIP1      | Cytoplasmic FMR1-interacting protein 1                                 | 0.85        |
| 41 | DYNC1I2     | Cytoplasmic dynein 1 intermediate chain 2                              | 0.85        |
| 42 | TPD52L2     | Tumor protein D54                                                      | 0.85        |
| 43 | SUMO2       | Small ubiquitin-related modifier 2                                     | 0.85        |
| 44 | METAP2      | Methionine aminopeptidase 2                                            | 0.85        |
| 45 | PFN1        | Profilin                                                               | 0.85        |
| 46 | LMNB1       | Lamin B1, isoform CRA_a                                                | 0.85        |
| 47 | TMEM189-UBI | HCG2044781                                                             | 0.84        |
| 48 | TXNDC17     | Thioredoxin domain-containing protein 17                               | 0.84        |
| 49 | SPTAN1      | Spectrin alpha chain, non-erythrocytic 1                               | 0.84        |

|     |           |                                                                   |      |
|-----|-----------|-------------------------------------------------------------------|------|
| 50  | MCM6      | DNA replication licensing factor MCM6                             | 0.84 |
| 51  | HSP90AB4P | Putative heat shock protein HSP 90-beta 4                         | 0.84 |
| 52  | PKM       | Pyruvate kinase                                                   | 0.84 |
| 53  | STRBP     | Spermatid perinuclear RNA-binding protein                         | 0.84 |
| 54  | ZCCHC2    | Zinc finger CCHC domain-containing protein 2                      | 0.84 |
| 55  | NPEPPSL1  | Puromycin-sensitive aminopeptidase-like protein                   | 0.84 |
| 56  | COPS3     | COP9 signalosome complex subunit 3                                | 0.84 |
| 57  | RPS6      | 40S ribosomal protein S6                                          | 0.84 |
| 58  | MTHFD1    | C-1-tetrahydrofolate synthase, cytoplasmic                        | 0.83 |
| 59  | RPL23A    | 60S ribosomal protein L23a                                        | 0.83 |
| 60  | MAP4      | Microtubule-associated protein                                    | 0.83 |
| 61  | GDI2      | Rab GDP dissociation inhibitor beta                               | 0.83 |
| 62  | ILF3      | Interleukin enhancer-binding factor 3                             | 0.83 |
| 63  | KHSRP     | Far upstream element-binding protein 2                            | 0.83 |
| 64  | LARS      | Leucine--tRNA ligase, cytoplasmic                                 | 0.83 |
| 65  | SUMO3     | Small ubiquitin-related modifier 3                                | 0.83 |
| 66  | PDIA6     | Protein disulfide-isomerase A6                                    | 0.83 |
| 67  | PLS3      | Plastin-3                                                         | 0.83 |
| 68  | PDHB      | Pyruvate dehydrogenase E1 component subunit beta, mitochondrial   | 0.83 |
| 69  | GSPT1     | Eukaryotic peptide chain release factor GTP-binding subunit ERF3A | 0.83 |
| 70  | TBCA      | Tubulin-specific chaperone A                                      | 0.83 |
| 71  | SF3A1     | Splicing factor 3A subunit 1                                      | 0.82 |
| 72  | PTRHD1    | Putative peptidyl-tRNA hydrolase PTRHD1                           | 0.82 |
| 73  | FKBP4     | Peptidyl-prolyl cis-trans isomerase FKBP4                         | 0.82 |
| 74  | HSP90AB1  | Heat shock protein HSP 90-beta                                    | 0.82 |
| 75  | POLR2C    | DNA-directed RNA polymerase II subunit RPB3                       | 0.82 |
| 76  | U2AF2     | Splicing factor U2AF 65 kDa subunit                               | 0.82 |
| 77  | MCM3      | DNA replication licensing factor MCM3                             | 0.82 |
| 78  | SLC1A5    | Neutral amino acid transporter B(0)                               | 0.82 |
| 79  | RPL10     | 60S ribosomal protein L10                                         | 0.82 |
| 80  | DHX15     | Pre-mRNA-splicing factor ATP-dependent RNA helicase DHX15         | 0.82 |
| 81  | PRPS1L1   | Ribose-phosphate pyrophosphokinase 3                              | 0.82 |
| 82  | RPSA      | 40S ribosomal protein SA                                          | 0.82 |
| 83  | CAND1     | Cullin-associated NEDD8-dissociated protein 1                     | 0.82 |
| 84  | DDX39A    | ATP-dependent RNA helicase DDX39A                                 | 0.82 |
| 85  | EEF1D     | Elongation factor 1-delta                                         | 0.82 |
| 86  | HYOU1     | Hypoxia up-regulated protein 1                                    | 0.82 |
| 87  | PKM       | Pyruvate kinase PKM                                               | 0.82 |
| 88  | RPL31     | 60S ribosomal protein L31                                         | 0.82 |
| 89  | FAM98B    | Protein FAM98B                                                    | 0.82 |
| 90  | KYAT3     | Kynurenine--oxoglutarate transaminase 3                           | 0.82 |
| 91  | TARDBP    | TAR DNA-binding protein 43                                        | 0.81 |
| 92  | MYBBP1A   | Myb-binding protein 1A                                            | 0.81 |
| 93  | DPP3      | Dipeptidyl peptidase 3                                            | 0.81 |
| 94  | PKM       | Pyruvate kinase                                                   | 0.81 |
| 95  | PYGL      | Alpha-1,4 glucan phosphorylase                                    | 0.81 |
| 96  | TRIM46    | Tripartite motif-containing protein 46                            | 0.81 |
| 97  | YARS      | Tyrosine--tRNA ligase, cytoplasmic                                | 0.81 |
| 98  | CSNK2A2   | Casein kinase II subunit alpha'                                   | 0.81 |
| 99  | HN1       | Hematological and neurological-expressed 1 protein                | 0.81 |
| 100 | SUPT16H   | FACT complex subunit SPT16                                        | 0.81 |
| 101 | CCDC124   | Coiled-coil domain-containing protein 124                         | 0.81 |
| 102 | CLPP      | ATP-dependent Clp protease proteolytic subunit                    | 0.81 |
| 103 | RPL12     | 60S ribosomal protein L12                                         | 0.81 |
| 104 | FEN1      | Flap endonuclease 1                                               | 0.81 |

|     |           |                                                                                      |      |
|-----|-----------|--------------------------------------------------------------------------------------|------|
| 105 | HNRNPM    | Heterogeneous nuclear ribonucleoprotein M                                            | 0.81 |
| 106 | MYH10     | Myosin-10                                                                            | 0.81 |
| 107 | MAGOHB    | Protein mago nashi homolog 2                                                         | 0.81 |
| 108 | EWSR1     | RNA-binding protein EWS                                                              | 0.81 |
| 109 | OLA1      | Obg-like ATPase 1                                                                    | 0.81 |
| 110 | SND1      | Staphylococcal nuclease domain-containing protein 1                                  | 0.81 |
| 111 | CAP1      | Adenylyl cyclase-associated protein 1                                                | 0.80 |
| 112 | HIKESHI   | Protein Hikeshi                                                                      | 0.80 |
| 113 | PSMD4     | 26S proteasome non-ATPase regulatory subunit 4                                       | 0.80 |
| 114 | TKT       | Transketolase                                                                        | 0.80 |
| 115 | CRKL      | Crk-like protein                                                                     | 0.80 |
| 116 | NAP1L4    | Nucleosome assembly protein 1-like 4                                                 | 0.80 |
| 117 | SMARCA5   | SWI/SNF-related matrix-associated actin-dependent regulator of chromatin subfamily   | 0.80 |
| 118 | SF3B5     | Splicing factor 3B subunit 5                                                         | 0.80 |
| 119 | NAP1L4    | Nucleosome assembly protein 1-like 4                                                 | 0.80 |
| 120 | SF3B3     | Splicing factor 3B subunit 3                                                         | 0.80 |
| 121 | EIF1      | Eukaryotic translation initiation factor 1                                           | 0.80 |
| 122 | ATP5B     | ATP synthase subunit beta                                                            | 0.80 |
| 123 | CHMP5     | Charged multivesicular body protein 5                                                | 0.80 |
| 124 | SEPT2     | Septin-2                                                                             | 0.80 |
| 125 | DCTPP1    | dCTP pyrophosphatase 1                                                               | 0.80 |
| 126 | TFG       | Protein TFG                                                                          | 0.80 |
| 127 | ALDOA     | Fructose-bisphosphate aldolase A                                                     | 0.80 |
| 128 | FKBP10    | Peptidylprolyl isomerase                                                             | 0.80 |
| 129 | LDHB      | L-lactate dehydrogenase B chain                                                      | 0.80 |
| 130 | ATP5A1    | ATP synthase subunit alpha, mitochondrial                                            | 0.80 |
| 131 | SMARCE1   | SWI/SNF-related matrix-associated actin-dependent regulator of chromatin subfamily   | 0.80 |
| 132 | RPS27     | 40S ribosomal protein S27                                                            | 0.80 |
| 133 | SF3B1     | Splicing factor 3B subunit 1                                                         | 0.80 |
| 134 | PPP4C     | Serine/threonine-protein phosphatase                                                 | 0.80 |
| 135 | ACOT7     | Cytosolic acyl coenzyme A thioester hydrolase                                        | 0.80 |
| 136 | ATP5B     | ATP synthase subunit beta, mitochondrial                                             | 0.80 |
| 137 | MYBBP1A   | Myb-binding protein 1A                                                               | 0.80 |
| 138 | SULT1B1   | Sulfotransferase family cytosolic 1B member 1                                        | 0.80 |
| 139 | COPE      | Coatomer protein complex, subunit epsilon, isoform CRA_g                             | 0.80 |
| 140 | VIM       | Vimentin                                                                             | 0.80 |
| 141 | TMEM109   | Transmembrane protein 109                                                            | 0.79 |
| 142 | ALDOA     | Fructose-bisphosphate aldolase                                                       | 0.79 |
| 143 | PYGB      | Glycogen phosphorylase, brain form                                                   | 0.79 |
| 144 | KRI1      | Protein KRI1 homolog                                                                 | 0.79 |
| 145 | EIF2S1    | Eukaryotic translation initiation factor 2 subunit 1                                 | 0.79 |
| 146 | HIST1H1E  | Histone H1.4                                                                         | 0.79 |
| 147 | CCT5      | T-complex protein 1 subunit epsilon                                                  | 0.79 |
| 148 | FHL1      | Four and a half LIM domains protein 1                                                | 0.79 |
| 149 | MCM2      | DNA helicase                                                                         | 0.79 |
| 150 | ACPI      | Low molecular weight phosphotyrosine protein phosphatase                             | 0.79 |
| 151 | TNPO3     | Transportin-3                                                                        | 0.79 |
| 152 | NME1-NME2 | Nucleoside diphosphate kinase                                                        | 0.79 |
| 153 | NIFK      | MKI67 FHA domain-interacting nucleolar phosphoprotein                                | 0.79 |
| 154 | FDPS      | Farnesyl diphosphate synthase (Farnesyl pyrophosphate synthetase, dimethylallyltrans | 0.79 |
| 155 | MARS      | Methionine--tRNA ligase, cytoplasmic                                                 | 0.79 |
| 156 | CLEC16A   | Protein CLEC16A                                                                      | 0.79 |
| 157 | HSD17B4   | Peroxisomal multifunctional enzyme type 2                                            | 0.79 |
| 158 | RAB1B     | Ras-related protein Rab-1B                                                           | 0.79 |
| 159 | GMPS      | GMP synthase [glutamine-hydrolyzing]                                                 | 0.79 |

|     |            |                                                       |      |
|-----|------------|-------------------------------------------------------|------|
| 160 | LDHA       | L-lactate dehydrogenase A chain                       | 0.79 |
| 161 | HMG1       | High mobility group protein HMG-I/HMG-Y               | 0.79 |
| 162 | COL6A2     | Collagen alpha-2(VI) chain                            | 0.79 |
| 163 | RPL8       | 60S ribosomal protein L8                              | 0.79 |
| 164 | DBR1       | Lariat debranching enzyme                             | 0.79 |
| 165 | CSDE1      | Cold shock domain-containing protein E1               | 0.79 |
| 166 | EIF3J      | Eukaryotic translation initiation factor 3 subunit J  | 0.79 |
| 167 | FKBP5      | Peptidyl-prolyl cis-trans isomerase FKBP5             | 0.79 |
| 168 | STIP1      | Stress-induced-phosphoprotein 1                       | 0.79 |
| 169 | ACOT7      | Cytosolic acyl coenzyme A thioester hydrolase         | 0.79 |
| 170 | ST13       | Hsc70-interacting protein                             | 0.79 |
| 171 | NIFK       | MKI67 FHA domain-interacting nucleolar phosphoprotein | 0.78 |
| 172 | HEXIM1     | Protein HEXIM1                                        | 0.78 |
| 173 | VDAC1      | Voltage-dependent anion-selective channel protein 1   | 0.78 |
| 174 | NME1       | Nucleoside diphosphate kinase A                       | 0.78 |
| 175 | RPL6       | 60S ribosomal protein L6                              | 0.78 |
| 176 | DDX39B     | Spliceosome RNA helicase DDX39B                       | 0.78 |
| 177 | EBNA1BP2   | EBNA1 binding protein 2, isoform CRA_d                | 0.78 |
| 178 | CBX3       | Chromobox protein homolog 3                           | 0.78 |
| 179 | UBB        | Polyubiquitin-B                                       | 0.78 |
| 180 | ESPNL      | Espin-like protein                                    | 0.78 |
| 181 | AHCY       | Adenosylhomocysteinase                                | 0.78 |
| 182 | NAA50      | N-alpha-acetyltransferase 50                          | 0.78 |
| 183 | HSPE1-MOB4 | HSPE1-MOB4 readthrough                                | 0.78 |
| 184 | RPL18      | 60S ribosomal protein L18                             | 0.78 |
| 185 | AKAP12     | A-kinase anchor protein 12                            | 0.78 |
| 186 | PA2G4      | Proliferation-associated protein 2G4                  | 0.78 |
| 187 | RPS18      | 40S ribosomal protein S18                             | 0.78 |
| 188 | MSH6       | DNA mismatch repair protein Msh6                      | 0.78 |
| 189 | PCBP2      | Poly(rC)-binding protein 2                            | 0.78 |
| 190 | PEBP1      | Phosphatidylethanolamine-binding protein 1            | 0.78 |
| 191 | DISC1      | Disrupted in schizophrenia 1 isoform 49               | 0.78 |
| 192 | ATP5B      | ATP synthase subunit beta, mitochondrial              | 0.78 |
| 193 | QARS       | Glutamine--tRNA ligase                                | 0.78 |
| 194 | KARS       | Lysine--tRNA ligase                                   | 0.78 |
| 195 | DDX23      | Probable ATP-dependent RNA helicase DDX23             | 0.78 |
| 196 | MRPL3      | 39S ribosomal protein L3, mitochondrial               | 0.78 |
| 197 | PSMB6      | Proteasome subunit beta type-6                        | 0.78 |
| 198 | CANX       | Calnexin                                              | 0.78 |
| 199 | LANCL1     | LanC-like protein 1                                   | 0.78 |
| 200 | RAB1A      | Ras-related protein Rab-1A                            | 0.77 |
| 201 | EEF1D      | Elongation factor 1-delta                             | 0.77 |
| 202 | FKBP1A     | Peptidylprolyl isomerase                              | 0.77 |
| 203 | PFN2       | Profilin                                              | 0.77 |
| 204 | PRMT3      | Protein arginine N-methyltransferase 3                | 0.77 |
| 205 | VDAC1      | Voltage-dependent anion-selective channel protein 1   | 0.77 |
| 206 | RPL22      | 60S ribosomal protein L22                             | 0.77 |
| 207 | RAB2A      | Ras-related protein Rab-2A                            | 0.77 |
| 208 | RPS20      | 40S ribosomal protein S20                             | 0.77 |
| 209 | PABPC4     | Polyadenylate-binding protein 4                       | 0.77 |
| 210 | GCN1       | eIF-2-alpha kinase activator GCN1                     | 0.77 |
| 211 | HNRNPU     | Heterogeneous nuclear ribonucleoprotein U             | 0.77 |
| 212 | ATOX1      | Copper transport protein ATOX1                        | 0.77 |
| 213 | MYL6       | Myosin light polypeptide 6                            | 0.77 |
| 214 | PMPCB      | Mitochondrial-processing peptidase subunit beta       | 0.77 |



|     |          |                                                                       |      |
|-----|----------|-----------------------------------------------------------------------|------|
| 215 | RARS     | Arginine--tRNA ligase, cytoplasmic                                    | 0.77 |
| 216 | PSAT1    | Phosphoserine aminotransferase                                        | 0.77 |
| 217 | IDH1     | Isocitrate dehydrogenase [NADP] cytoplasmic                           | 0.77 |
| 218 | COX17    | Cytochrome c oxidase copper chaperone                                 | 0.77 |
| 219 | DDX5     | Probable ATP-dependent RNA helicase DDX5                              | 0.77 |
| 220 | NUCKS1   | Nuclear ubiquitous casein and cyclin-dependent kinase substrate 1     | 0.77 |
| 221 | RPL23    | 60S ribosomal protein L23                                             | 0.77 |
| 222 | RDX      | Radixin                                                               | 0.77 |
| 223 | FAHD2A   | Fumarylacetoacetate hydrolase domain-containing protein 2A            | 0.77 |
| 224 | TXNDC9   | Thioredoxin domain containing 9, isoform CRA_a                        | 0.77 |
| 225 | SRM      | Spermidine synthase                                                   | 0.77 |
| 226 | MDH1     | Malate dehydrogenase, cytoplasmic                                     | 0.77 |
| 227 | PRPF4    | U4/U6 small nuclear ribonucleoprotein Prp4                            | 0.77 |
| 228 | PRDX2    | Peroxiredoxin-2                                                       | 0.77 |
| 229 | HIST1H4A | Histone H4                                                            | 0.77 |
| 230 | PRDX1    | Peroxiredoxin-1                                                       | 0.76 |
| 231 | DCTN2    | Dynactin subunit 2                                                    | 0.76 |
| 232 | LAP3     | Cytosol aminopeptidase                                                | 0.76 |
| 233 | HARS2    | Probable histidine--tRNA ligase, mitochondrial                        | 0.76 |
| 234 | ILF2     | Interleukin enhancer-binding factor 2                                 | 0.76 |
| 235 | UBE2O    | (E3-independent) E2 ubiquitin-conjugating enzyme                      | 0.76 |
| 236 | AK2      | Adenylate kinase 2, mitochondrial                                     | 0.76 |
| 237 | ADSS     | Adenylosuccinate synthetase isozyme 2                                 | 0.76 |
| 238 | AIMP1    | Aminoacyl tRNA synthase complex-interacting multifunctional protein 1 | 0.76 |
| 239 | PRDX1    | Peroxiredoxin-1                                                       | 0.76 |
| 240 | DFFA     | DNA fragmentation factor subunit alpha                                | 0.76 |
| 241 | RPL8     | 60S ribosomal protein L8                                              | 0.76 |
| 242 | NFYA     | Nuclear transcription factor Y subunit alpha                          | 0.76 |
| 243 | RPL35    | 60S ribosomal protein L35                                             | 0.76 |
| 244 | MAK16    | Protein MAK16 homolog                                                 | 0.76 |
| 245 | ALDH16A1 | Aldehyde dehydrogenase family 16 member A1                            | 0.76 |
| 246 | CAMSAP2  | Calmodulin-regulated spectrin-associated protein 2                    | 0.76 |
| 247 | DCTN1    | Dynactin subunit 1                                                    | 0.76 |
| 248 | CCT6A    | T-complex protein 1 subunit zeta                                      | 0.76 |
| 249 | TST      | Thiosulfate sulfurtransferase                                         | 0.76 |
| 250 | RRP12    | RRP12-like protein                                                    | 0.76 |
| 251 | TUFM     | Elongation factor Tu, mitochondrial                                   | 0.76 |
| 252 | FLNB     | Filamin-B                                                             | 0.76 |
| 253 | LASP1    | LIM and SH3 domain protein 1                                          | 0.76 |
| 254 | MATR3    | Matrin-3                                                              | 0.76 |
| 255 | DCTN2    | Dynactin subunit 2                                                    | 0.76 |
| 256 | TPM1     | Tropomyosin 1 (Alpha), isoform CRA_f                                  | 0.76 |
| 257 | RPS3     | 40S ribosomal protein S3                                              | 0.76 |
| 258 | IARS     | Isoleucine--tRNA ligase, cytoplasmic                                  | 0.75 |
| 259 | ACYP1    | Acylphosphatase                                                       | 0.75 |
| 260 | ELOB     | Elongin-B                                                             | 0.75 |
| 261 | SMC1A    | Structural maintenance of chromosomes protein 1A                      | 0.75 |
| 262 | EIF3D    | Eukaryotic translation initiation factor 3 subunit D                  | 0.75 |
| 263 | DNMT1    | DNA (cytosine-5)-methyltransferase 1                                  | 0.75 |
| 264 | EXOSC2   | Exosome complex component RRP4                                        | 0.75 |
| 265 | PRDX2    | Peroxiredoxin 2, isoform CRA_a                                        | 0.75 |
| 266 | VPS35    | Vacuolar protein sorting-associated protein 35                        | 0.75 |
| 267 | CSE1L    | Exportin-2                                                            | 0.75 |
| 268 | MCM7     | DNA replication licensing factor MCM7                                 | 0.75 |
| 269 | HNRNPU   | Heterogeneous nuclear ribonucleoprotein U                             | 0.75 |

|     |         |                                                                                   |      |
|-----|---------|-----------------------------------------------------------------------------------|------|
| 270 | SRP14   | Signal recognition particle 14 kDa protein                                        | 0.75 |
| 271 | TUBA1B  | Tubulin alpha-1B chain                                                            | 0.75 |
| 272 | SLIRP   | SRA stem-loop-interacting RNA-binding protein, mitochondrial                      | 0.75 |
| 273 | SARS    | Serine--tRNA ligase, cytoplasmic                                                  | 0.75 |
| 274 | RECQL5  | ATP-dependent DNA helicase Q5                                                     | 0.75 |
| 275 | CDV3    | Protein CDV3 homolog                                                              | 0.75 |
| 276 | WDR77   | Methylosome protein 50                                                            | 0.75 |
| 277 | SRPRB   | Signal recognition particle receptor subunit beta                                 | 0.75 |
| 278 | EIF3G   | Eukaryotic translation initiation factor 3 subunit G                              | 0.75 |
| 279 | TRAP1   | Heat shock protein 75 kDa, mitochondrial                                          | 0.75 |
| 280 | RPS27L  | 40S ribosomal protein S27                                                         | 0.75 |
| 281 | EIF4A3  | Eukaryotic initiation factor 4A-III                                               | 0.75 |
| 282 | MCM4    | DNA replication licensing factor MCM4                                             | 0.75 |
| 283 | RPL17   | 60S ribosomal protein L17                                                         | 0.75 |
| 284 | SF3B2   | Splicing factor 3B subunit 2                                                      | 0.75 |
| 285 | CHMP4B  | Charged multivesicular body protein 4b                                            | 0.75 |
| 286 | MMP3    | Stromelysin-1                                                                     | 0.75 |
| 287 | CCT8    | T-complex protein 1 subunit theta                                                 | 0.75 |
| 288 | PPP2R1A | Serine/threonine-protein phosphatase 2A 65 kDa regulatory subunit A alpha isoform | 0.75 |
| 289 | TBR1    | T-box brain protein 1                                                             | 0.75 |
| 290 | ASNS    | Asparagine synthetase [glutamine-hydrolyzing]                                     | 0.75 |
| 291 | UCHL5   | Ubiquitin carboxyl-terminal hydrolase                                             | 0.75 |
| 292 | CYB5A   | Cytochrome b5                                                                     | 0.75 |
| 293 | SKP1    | S-phase kinase-associated protein 1                                               | 0.75 |
| 294 | BAG3    | BAG family molecular chaperone regulator 3                                        | 0.75 |
| 295 | CELF1   | CUG triplet repeat, RNA binding protein 1, isoform CRA_c                          | 0.75 |
| 296 | PAF1    | RNA polymerase II-associated factor 1 homolog                                     | 0.74 |
| 297 | DPYSL5  | Dihydropyrimidinase-related protein 5                                             | 0.74 |
| 298 | CCT4    | T-complex protein 1 subunit delta                                                 | 0.74 |
| 299 | ADSL    | Adenylosuccinate lyase                                                            | 0.74 |
| 300 | API5    | Apoptosis inhibitor 5                                                             | 0.74 |
| 301 | AIMP1   | Aminoacyl tRNA synthase complex-interacting multifunctional protein 1             | 0.74 |
| 302 | LARP1   | La-related protein 1                                                              | 0.74 |
| 303 | MRPS26  | 28S ribosomal protein S26, mitochondrial                                          | 0.74 |
| 304 | PSMD12  | 26S proteasome non-ATPase regulatory subunit 12                                   | 0.74 |
| 305 | BOP1    | Ribosome biogenesis protein BOP1                                                  | 0.74 |
| 306 | RAB14   | Ras-related protein Rab-14                                                        | 0.74 |
| 307 | FUBP1   | Far upstream element-binding protein 1                                            | 0.74 |
| 308 | DDB1    | DNA damage-binding protein 1                                                      | 0.74 |
| 309 | AP3B1   | AP-3 complex subunit beta-1                                                       | 0.74 |
| 310 | PSMA4   | Proteasome endopeptidase complex                                                  | 0.74 |
| 311 | AP1B1   | AP-1 complex subunit beta-1                                                       | 0.74 |
| 312 | EXOSC2  | Exosome complex component RRP4                                                    | 0.74 |
| 313 | ADAR    | Double-stranded RNA-specific adenosine deaminase                                  | 0.74 |
| 314 | MAPRE1  | Microtubule-associated protein RP/EB family member 1                              | 0.74 |
| 315 | EIF3M   | Eukaryotic translation initiation factor 3 subunit M                              | 0.74 |
| 316 | PRPF4B  | Serine/threonine-protein kinase PRP4 homolog                                      | 0.74 |
| 317 | PSMC5   | 26S protease regulatory subunit 8                                                 | 0.74 |
| 318 | RPS16   | 40S ribosomal protein S16                                                         | 0.74 |
| 319 | THUMPD1 | THUMP domain-containing protein 1                                                 | 0.74 |
| 320 | ZRANB2  | Zinc finger Ran-binding domain-containing protein 2                               | 0.74 |
| 321 | SNX2    | Sorting nexin-2                                                                   | 0.74 |
| 322 | ETF1    | Eukaryotic peptide chain release factor subunit 1                                 | 0.74 |
| 323 | EIF3M   | Eukaryotic translation initiation factor 3 subunit M                              | 0.74 |
| 324 | BUB3    | Mitotic checkpoint protein BUB3                                                   | 0.74 |

|     |           |                                                                 |      |
|-----|-----------|-----------------------------------------------------------------|------|
| 325 | RPL32     | 60S ribosomal protein L32                                       | 0.74 |
| 326 | EPN1      | Epsin-1                                                         | 0.73 |
| 327 | EZR       | Ezrin                                                           | 0.73 |
| 328 | CORO1B    | Coronin-1B                                                      | 0.73 |
| 329 | MOGS      | Mannosyl-oligosaccharide glucosidase                            | 0.73 |
| 330 | ADSL      | Adenylosuccinate lyase                                          | 0.73 |
| 331 | IMPDH1    | Inosine-5'-monophosphate dehydrogenase 1                        | 0.73 |
| 332 | PDCD6IP   | Programmed cell death 6-interacting protein                     | 0.73 |
| 333 | STUB1     | E3 ubiquitin-protein ligase CHIP                                | 0.73 |
| 334 | PMPCA     | Mitochondrial-processing peptidase subunit alpha                | 0.73 |
| 335 | DCXR      | L-xylulose reductase                                            | 0.73 |
| 336 | ANKRD17   | Ankyrin repeat domain-containing protein 17                     | 0.73 |
| 337 | VARS      | Valine--tRNA ligase                                             | 0.73 |
| 338 | PCCA      | Propionyl-CoA carboxylase alpha chain, mitochondrial            | 0.73 |
| 339 | DUT       | Deoxyuridine 5'-triphosphate nucleotidohydrolase, mitochondrial | 0.73 |
| 340 | EEF2      | Elongation factor 2                                             | 0.73 |
| 341 | PDLIM1    | PDZ and LIM domain protein 1                                    | 0.73 |
| 342 | CTNBL1    | Beta-catenin-like protein 1                                     | 0.73 |
| 343 | VBP1      | Prefoldin subunit 3                                             | 0.73 |
| 344 | PSMB2     | Proteasome subunit beta type-2                                  | 0.73 |
| 345 | MTHFD1L   | Monofunctional C1-tetrahydrofolate synthase, mitochondrial      | 0.73 |
| 346 | EPS15L1   | Epidermal growth factor receptor substrate 15-like 1            | 0.73 |
| 347 | SRCAP     | Helicase SRCAP                                                  | 0.73 |
| 348 | RTN4      | Reticulon                                                       | 0.73 |
| 349 | SMC1A     | Structural maintenance of chromosomes protein                   | 0.73 |
| 350 | CHORDC1   | Cysteine and histidine-rich domain-containing protein 1         | 0.73 |
| 351 | ARL6IP4   | ADP-ribosylation factor-like protein 6-interacting protein 4    | 0.73 |
| 352 | RCN2      | Reticulocalbin-2                                                | 0.73 |
| 353 | EWSR1     | RNA-binding protein EWS                                         | 0.73 |
| 354 | UBTF      | Nucleolar transcription factor 1                                | 0.73 |
| 355 | TRIM28    | Transcription intermediary factor 1-beta                        | 0.73 |
| 356 | CTPS1     | CTP synthase 1                                                  | 0.73 |
| 357 | VDAC2     | Voltage-dependent anion-selective channel protein 2             | 0.73 |
| 358 | PTMS      | Parathymosin                                                    | 0.73 |
| 359 | GNPDA1    | Glucosamine-6-phosphate isomerase                               | 0.73 |
| 360 | PLIN3     | Perilipin-3                                                     | 0.73 |
| 361 | STAG2     | Cohesin subunit SA-2                                            | 0.73 |
| 362 | GEMIN5    | Gem-associated protein 5                                        | 0.73 |
| 363 | KTN1      | Kinectin                                                        | 0.73 |
| 364 | TXNL1     | Thioredoxin-like protein 1                                      | 0.73 |
| 365 | SNRNP70   | U1 small nuclear ribonucleoprotein 70 kDa                       | 0.73 |
| 366 | HIST1H2BN | Histone H2B                                                     | 0.73 |
| 367 | BOP1      | Ribosome biogenesis protein BOP1                                | 0.73 |
| 368 | SSRP1     | FACT complex subunit SSRP1                                      | 0.73 |
| 369 | PPP1R7    | Protein phosphatase 1 regulatory subunit 7                      | 0.73 |
| 370 | NAMPT     | Nicotinamide phosphoribosyltransferase                          | 0.73 |
| 371 | RABGAP1   | Rab GTPase-activating protein 1                                 | 0.72 |
| 372 | RBM17     | Splicing factor 45                                              | 0.72 |
| 373 | PRPSAP2   | Phosphoribosyl pyrophosphate synthase-associated protein 2      | 0.72 |
| 374 | GAF3      | FGF-2 activity-associated protein 3                             | 0.72 |
| 375 | S100A13   | Protein S100-A13                                                | 0.72 |
| 376 | EIF3I     | Eukaryotic translation initiation factor 3 subunit I            | 0.72 |
| 377 | EIF2S1    | Eukaryotic translation initiation factor 2 subunit 1            | 0.72 |
| 378 | AGL       | Glycogen debranching enzyme                                     | 0.72 |
| 379 | FLNA      | Filamin-A                                                       | 0.72 |

|     |             |                                                                   |      |
|-----|-------------|-------------------------------------------------------------------|------|
| 380 | SPG20       | Spartin                                                           | 0.72 |
| 381 | EEF1A1      | Elongation factor 1-alpha 1                                       | 0.72 |
| 382 | PPID        | Peptidyl-prolyl cis-trans isomerase D                             | 0.72 |
| 383 | CNDP2       | Cytosolic non-specific dipeptidase                                | 0.72 |
| 384 | ELAC2       | ElaC homolog 2 (E. coli), isoform CRA_a                           | 0.72 |
| 385 | RPS10-NUDT3 | RPS10-NUDT3 readthrough                                           | 0.72 |
| 386 | STARD9      | StAR-related lipid transfer protein 9                             | 0.72 |
| 387 | GINS3       | DNA replication complex GINS protein PSF3                         | 0.72 |
| 388 | NAP1L1      | Nucleosome assembly protein 1-like 1                              | 0.72 |
| 389 | OTUB1       | Ubiquitin thioesterase                                            | 0.72 |
| 390 | ACACA       | Acetyl-CoA carboxylase 1                                          | 0.72 |
| 391 | CHD4        | Chromodomain-helicase-DNA-binding protein 4                       | 0.72 |
| 392 | ALPI        | Intestinal-type alkaline phosphatase                              | 0.72 |
| 393 | PDCD5       | Programmed cell death protein 5                                   | 0.72 |
| 394 | AHCYL2      | Adenosylhomocysteinase                                            | 0.72 |
| 395 | PSMA6       | Proteasome subunit alpha type                                     | 0.72 |
| 396 | KIN         | DNA/RNA-binding protein KIN17                                     | 0.72 |
| 397 | BCLAF1      | Bel-2-associated transcription factor 1                           | 0.72 |
| 398 | VPS26A      | Vacuolar protein sorting-associated protein 26A                   | 0.72 |
| 399 | AP2B1       | AP-2 complex subunit beta                                         | 0.72 |
| 400 | CDK1        | Cyclin-dependent kinase 1                                         | 0.72 |
| 401 | PPIE        | Peptidyl-prolyl cis-trans isomerase                               | 0.72 |
| 402 | TPM3        | Tropomyosin alpha-3 chain                                         | 0.72 |
| 403 | COX6B1      | Cytochrome c oxidase subunit 6B1                                  | 0.71 |
| 404 | MYL12A      | Myosin regulatory light chain 12A                                 | 0.71 |
| 405 | EIF3CL      | Eukaryotic translation initiation factor 3 subunit C-like protein | 0.71 |
| 406 | HIST1H2BJ   | Histone H2B type 1-J                                              | 0.71 |
| 407 | MDN1        | Midasin                                                           | 0.71 |
| 408 | DDX18       | ATP-dependent RNA helicase DDX18                                  | 0.71 |
| 409 | BAZ1B       | Tyrosine-protein kinase BAZ1B                                     | 0.71 |
| 410 | COPA        | Coatomer subunit alpha                                            | 0.71 |
| 411 | ARHGDI1     | Rho GDP-dissociation inhibitor 1                                  | 0.71 |
| 412 | GART        | Trifunctional purine biosynthetic protein adenosine-3             | 0.71 |
| 413 | DYNC1H1     | Cytoplasmic dynein 1 heavy chain 1                                | 0.71 |
| 414 | GTF2F1      | General transcription factor IIF subunit 1                        | 0.71 |
| 415 | ZBTB1       | Zinc finger and BTB domain-containing protein 1                   | 0.71 |
| 416 | RPS29       | 40S ribosomal protein S29                                         | 0.71 |
| 417 | PAPOLA      | Poly(A) polymerase alpha                                          | 0.71 |
| 418 | PRKAR2A     | cAMP-dependent protein kinase type II-alpha regulatory subunit    | 0.71 |
| 419 | EXOSC5      | Exosome complex component RRP46                                   | 0.71 |
| 420 | LRRFIP1     | Leucine-rich repeat flightless-interacting protein 1              | 0.71 |
| 421 | CARS        | Cysteine--tRNA ligase, cytoplasmic                                | 0.71 |
| 422 | PSME1       | Proteasome activator complex subunit 1                            | 0.71 |
| 423 | KPNA1       | Importin subunit alpha-5                                          | 0.71 |
| 424 | CCDC43      | CCDC43 protein                                                    | 0.71 |
| 425 | PPT1        | Palmitoyl-protein thioesterase 1                                  | 0.71 |
| 426 | CDV3        | Protein CDV3 homolog                                              | 0.71 |
| 427 | MRPS22      | 28S ribosomal protein S22, mitochondrial                          | 0.71 |
| 428 | PPA2        | Inorganic pyrophosphatase 2, mitochondrial                        | 0.71 |
| 429 | KCTD5       | BTB/POZ domain-containing protein KCTD5                           | 0.71 |
| 430 | EIF4G1      | Eukaryotic translation initiation factor 4 gamma 1                | 0.71 |
| 431 | C7orf50     | Uncharacterized protein C7orf50                                   | 0.71 |
| 432 | GNPDA2      | Glucosamine-6-phosphate isomerase 2                               | 0.71 |
| 433 | SNRNP200    | U5 small nuclear ribonucleoprotein 200 kDa helicase               | 0.71 |
| 434 | RBM17       | Splicing factor 45                                                | 0.71 |

|     |             |                                                                                 |      |
|-----|-------------|---------------------------------------------------------------------------------|------|
| 435 | RACK1       | Receptor of-activated protein C kinase 1                                        | 0.71 |
| 436 | TBCB        | Tubulin-folding cofactor B                                                      | 0.71 |
| 437 | CDKN2A      | Cyclin-dependent kinase inhibitor 2A                                            | 0.71 |
| 438 | TXNDC5      | Thioredoxin domain-containing protein 5                                         | 0.71 |
| 439 | ATXN10      | Ataxin-10                                                                       | 0.71 |
| 440 | C19orf25    | UPF0449 protein C19orf25                                                        | 0.71 |
| 441 | DIABLO      | Diablo homolog, mitochondrial                                                   | 0.71 |
| 442 | P4HA1       | Prolyl 4-hydroxylase subunit alpha-1                                            | 0.71 |
| 443 | VARS        | Valine--tRNA ligase                                                             | 0.71 |
| 444 | EFTUD2      | 116 kDa U5 small nuclear ribonucleoprotein component                            | 0.71 |
| 445 | PPP2R5D     | Serine/threonine-protein phosphatase 2A 56 kDa regulatory subunit delta isoform | 0.71 |
| 446 | FASTKD2     | FAST kinase domain-containing protein 2, mitochondrial                          | 0.71 |
| 447 | CIAO1       | Probable cytosolic iron-sulfur protein assembly protein CIAO1                   | 0.71 |
| 448 | COPS8       | COP9 signalosome complex subunit 8                                              | 0.70 |
| 449 | SETD3       | Histone-lysine N-methyltransferase setd3                                        | 0.70 |
| 450 | YTHDF1      | YTH domain-containing family protein 1                                          | 0.70 |
| 451 | ME2         | NAD-dependent malic enzyme, mitochondrial                                       | 0.70 |
| 452 | ACTR2       | Actin-related protein 2                                                         | 0.70 |
| 453 | PSMD3       | 26S proteasome non-ATPase regulatory subunit 3                                  | 0.70 |
| 454 | SYAP1       | Synapse-associated protein 1                                                    | 0.70 |
| 455 | UPF1        | Regulator of nonsense transcripts 1                                             | 0.70 |
| 456 | TUBA4A      | Tubulin alpha-4A chain                                                          | 0.70 |
| 457 | STAM2       | Signal transducing adapter molecule 2                                           | 0.70 |
| 458 | CUL4B       | Cullin 4B, isoform CRA_e                                                        | 0.70 |
| 459 | EML5        | Echinoderm microtubule-associated protein-like 5                                | 0.70 |
| 460 | ARPC4-TTLL3 | ARPC4-TTLL3 readthrough                                                         | 0.70 |
| 461 | CYB5R3      | NADH-cytochrome b5 reductase 3                                                  | 0.70 |
| 462 | LARP4       | La-related protein 4                                                            | 0.70 |
| 463 | PRPF19      | Pre-mRNA-processing factor 19                                                   | 0.70 |
| 464 | SH3KBP1     | SH3 domain-containing kinase-binding protein 1                                  | 0.70 |
| 465 | POLR2E      | DNA-directed RNA polymerases I, II, and III subunit RPABC1                      | 0.70 |
| 466 | KPNA5       | Importin subunit alpha-6                                                        | 0.70 |
| 467 | CAD         | CAD protein                                                                     | 0.70 |
| 468 | KCTD12      | BTB/POZ domain-containing protein KCTD12                                        | 0.70 |
| 469 | PHLPP1      | PH domain leucine-rich repeat-containing protein phosphatase 1                  | 0.70 |
| 470 | RPS28       | 40S ribosomal protein S28                                                       | 0.70 |
| 471 | CLUH        | Clustered mitochondria protein homolog                                          | 0.70 |
| 472 | RANGAP1     | Ran GTPase-activating protein 1                                                 | 0.70 |
| 473 | SF3A2       | Splicing factor 3A subunit 2                                                    | 0.70 |
| 474 | TOMM34      | Mitochondrial import receptor subunit TOM34                                     | 0.70 |
| 475 | UBE2V1      | Ubiquitin-conjugating enzyme E2 variant 1                                       | 0.70 |
| 476 | EIF3C       | Eukaryotic translation initiation factor 3 subunit C                            | 0.70 |
| 477 | ABCF2       | ATP-binding cassette sub-family F member 2                                      | 0.70 |
| 478 | EMD         | Emerin                                                                          | 0.70 |
| 479 | TACO1       | Translational activator of cytochrome c oxidase 1                               | 0.70 |
| 480 | VTA1        | Chromosome 6 open reading frame 55, isoform CRA_b                               | 0.70 |
| 481 | NOP14       | Nucleolar protein 14                                                            | 0.70 |
| 482 | DDI2        | Protein DDI1 homolog 2                                                          | 0.70 |
| 483 | KDELC2      | KDEL motif-containing protein 2                                                 | 0.70 |
| 484 | POLR2G      | DNA-directed RNA polymerase II subunit RPB7                                     | 0.70 |
| 485 | RPL18       | 60S ribosomal protein L18                                                       | 0.69 |
| 486 | PHB         | Prohibitin                                                                      | 0.69 |
| 487 | HK2         | Hexokinase-2                                                                    | 0.69 |
| 488 | IPO8        | Importin-8                                                                      | 0.69 |
| 489 | NDUFS3      | NADH dehydrogenase [ubiquinone] iron-sulfur protein 3, mitochondrial            | 0.69 |

|     |          |                                                                       |      |
|-----|----------|-----------------------------------------------------------------------|------|
| 490 | KPNA1    | Importin subunit alpha-5                                              | 0.69 |
| 491 | GINS4    | DNA replication complex GINS protein SLD5                             | 0.69 |
| 492 | ATP1A1   | Sodium/potassium-transporting ATPase subunit alpha-1                  | 0.69 |
| 493 | RWDD1    | RWD domain-containing protein 1                                       | 0.69 |
| 494 | UBE2O    | (E3-independent) E2 ubiquitin-conjugating enzyme                      | 0.69 |
| 495 | AIMP2    | Aminoacyl tRNA synthase complex-interacting multifunctional protein 2 | 0.69 |
| 496 | SNX5     | Sorting nexin-5                                                       | 0.69 |
| 497 | DDX3X    | ATP-dependent RNA helicase DDX3X                                      | 0.69 |
| 498 | SRSF5    | Serine/arginine-rich splicing factor 5                                | 0.69 |
| 499 | FSCN1    | Fascin                                                                | 0.69 |
| 500 | CALD1    | Caldesmon                                                             | 0.69 |
| 501 | RAC3     | Ras-related C3 botulinum toxin substrate 3                            | 0.69 |
| 502 | RAB14    | Ras-related protein Rab-14                                            | 0.69 |
| 503 | SRSF4    | Serine/arginine-rich-splicing factor 4                                | 0.69 |
| 504 | FAM50B   | Protein FAM50B                                                        | 0.69 |
| 505 | TKFC     | Triokinase/FMN cyclase                                                | 0.69 |
| 506 | NAP1L1   | Nucleosome assembly protein 1-like 1                                  | 0.69 |
| 507 | HMGB2    | High mobility group protein B2                                        | 0.69 |
| 508 | PRPF4B   | Serine/threonine-protein kinase PRP4 homolog                          | 0.69 |
| 509 | MYL12A   | Myosin regulatory light chain 12A                                     | 0.69 |
| 510 | PPAT     | Amidophosphoribosyltransferase                                        | 0.69 |
| 511 | RPS25    | 40S ribosomal protein S25                                             | 0.69 |
| 512 | FKBP10   | Peptidyl-prolyl cis-trans isomerase FKBP10                            | 0.69 |
| 513 | HSPA14   | Heat shock 70 kDa protein 14                                          | 0.69 |
| 514 | PLCB3    | 1-phosphatidylinositol 4,5-bisphosphate phosphodiesterase beta-3      | 0.69 |
| 515 | POLR2L   | DNA-directed RNA polymerases I, II, and III subunit RPABC5            | 0.69 |
| 516 | MRPL47   | 39S ribosomal protein L47, mitochondrial                              | 0.69 |
| 517 | IMPDH1   | Inosine-5'-monophosphate dehydrogenase 1                              | 0.69 |
| 518 | ARPC5    | Actin-related protein 2/3 complex subunit 5                           | 0.69 |
| 519 | PAFAH1B1 | Platelet-activating factor acetylhydrolase IB subunit alpha           | 0.69 |
| 520 | DDX10    | RNA helicase                                                          | 0.69 |
| 521 | RPL11    | 60S ribosomal protein L11                                             | 0.68 |
| 522 | CFAP20   | Cilia- and flagella-associated protein 20                             | 0.68 |
| 523 | AKR1A1   | Alcohol dehydrogenase [NADP(+)]                                       | 0.68 |
| 524 | CCAR2    | Cell cycle and apoptosis regulator protein 2                          | 0.68 |
| 525 | HSPB11   | Chromosome 1 open reading frame 41, isoform CRA_b                     | 0.68 |
| 526 | POP1     | Ribonucleases P/MRP protein subunit POP1                              | 0.68 |
| 527 | MIB2     | E3 ubiquitin-protein ligase MIB2                                      | 0.68 |
| 528 | RAD23B   | UV excision repair protein RAD23 homolog B                            | 0.68 |
| 529 | PDE12    | 2',5'-phosphodiesterase 12                                            | 0.68 |
| 530 | NACA     | Nascent polypeptide-associated complex subunit alpha                  | 0.68 |
| 531 | PSME2    | Proteasome activator complex subunit 2                                | 0.68 |
| 532 | TRMT1L   | TRMT1-like protein                                                    | 0.68 |
| 533 | ATP5O    | ATP synthase subunit O, mitochondrial                                 | 0.68 |
| 534 | RPS11    | 40S ribosomal protein S11                                             | 0.68 |
| 535 | DHRS7    | Dehydrogenase/reductase SDR family member 7                           | 0.68 |
| 536 | SLK      | STE20-like serine/threonine-protein kinase                            | 0.68 |
| 537 | PNN      | Pinin                                                                 | 0.68 |
| 538 | MYLK     | Myosin light chain kinase, smooth muscle                              | 0.68 |
| 539 | SUPT6H   | Transcription elongation factor SPT6                                  | 0.68 |
| 540 | TPM3     | Tropomyosin alpha-3 chain                                             | 0.68 |
| 541 | UBASH3B  | Ubiquitin-associated and SH3 domain-containing protein B              | 0.68 |
| 542 | SRI      | Sorcin                                                                | 0.68 |
| 543 | COPS7B   | COP9 signalosome complex subunit 7b                                   | 0.68 |
| 544 | CALCOCO2 | Calcium-binding and coiled-coil domain-containing protein 2           | 0.68 |

|     |           |                                                                           |      |
|-----|-----------|---------------------------------------------------------------------------|------|
| 545 | GORASP2   | Golgi reassembly-stacking protein 2                                       | 0.68 |
| 546 | CUTA      | Protein CutA                                                              | 0.68 |
| 547 | TBL3      | Transducin beta-like protein 3                                            | 0.68 |
| 548 | RPRD1B    | Regulation of nuclear pre-mRNA domain-containing protein 1B               | 0.68 |
| 549 | SRPK1     | SRSF protein kinase 1                                                     | 0.68 |
| 550 | ZNF428    | Zinc finger protein 428                                                   | 0.68 |
| 551 | PSMA3     | Proteasome subunit alpha type-3                                           | 0.68 |
| 552 | VPS29     | Vacuolar protein sorting-associated protein 29                            | 0.68 |
| 553 | TUBB3     | Tubulin beta-3 chain                                                      | 0.68 |
| 554 | NOP16     | Nucleolar protein 16                                                      | 0.68 |
| 555 | PSMB1     | Proteasome subunit beta type-1                                            | 0.68 |
| 556 | HECTD1    | E3 ubiquitin-protein ligase HECTD1                                        | 0.68 |
| 557 | FLYWCH1   | FLYWCH-type zinc finger-containing protein 1                              | 0.67 |
| 558 | TAX1BP3   | Tax1-binding protein 3                                                    | 0.67 |
| 559 | BAG2      | BAG family molecular chaperone regulator 2                                | 0.67 |
| 560 | RAB10     | Ras-related protein Rab-10                                                | 0.67 |
| 561 | RAB8A     | Ras-related protein Rab-8A                                                | 0.67 |
| 562 | CISD1     | CDGSH iron-sulfur domain-containing protein 1                             | 0.67 |
| 563 | AP1S1     | AP-1 complex subunit sigma-1A                                             | 0.67 |
| 564 | EIF2A     | Eukaryotic translation initiation factor 2A                               | 0.67 |
| 565 | RPL13     | 60S ribosomal protein L13                                                 | 0.67 |
| 566 | GABARAPL2 | Gamma-aminobutyric acid receptor-associated protein-like 2                | 0.67 |
| 567 | IDH3B     | Isocitrate dehydrogenase [NAD] subunit, mitochondrial                     | 0.67 |
| 568 | KCTD9     | BTB/POZ domain-containing protein KCTD9                                   | 0.67 |
| 569 | RAC2      | Ras-related C3 botulinum toxin substrate 2                                | 0.67 |
| 570 | HNRNPM    | Heterogeneous nuclear ribonucleoprotein M                                 | 0.67 |
| 571 | MFAP1     | Microfibrillar-associated protein 1                                       | 0.67 |
| 572 | FBL       | rRNA 2'-O-methyltransferase fibrillarin                                   | 0.67 |
| 573 | RPS8      | 40S ribosomal protein S8                                                  | 0.67 |
| 574 | CTSB      | Cathepsin B                                                               | 0.67 |
| 575 | HMGCS1    | Hydroxymethylglutaryl-CoA synthase, cytoplasmic                           | 0.67 |
| 576 | ACTL6A    | Actin-like protein 6A                                                     | 0.67 |
| 577 | CPXM2     | Inactive carboxypeptidase-like protein X2                                 | 0.67 |
| 578 | TCEA1     | Transcription elongation factor A protein 1                               | 0.67 |
| 579 | NCAPD2    | Condensin complex subunit 1                                               | 0.67 |
| 580 | UNC45A    | Protein unc-45 homolog A                                                  | 0.67 |
| 581 | RPL11     | 60S ribosomal protein L11                                                 | 0.67 |
| 582 | EEF1A2    | Elongation factor 1-alpha 2                                               | 0.67 |
| 583 | AASDHPPT  | L-aminoadipate-semialdehyde dehydrogenase-phosphopantetheinyl transferase | 0.67 |
| 584 | PGAM5     | Serine/threonine-protein phosphatase PGAM5, mitochondrial                 | 0.67 |
| 585 | TUBB      | Tubulin beta chain                                                        | 0.67 |
| 586 | SON       | Protein SON                                                               | 0.67 |
| 587 | C17orf49  | Chromosome 17 open reading frame 49                                       | 0.66 |
| 588 | EHD4      | EH domain-containing protein 4                                            | 0.66 |
| 589 | COPB2     | Coatomer subunit beta'                                                    | 0.66 |
| 590 | PFDN6     | Prefoldin subunit 6                                                       | 0.66 |
| 591 | RBM10     | RNA binding motif protein 10, isoform CRA_d                               | 0.66 |
| 592 | ATP6V1B2  | V-type proton ATPase subunit B, brain isoform                             | 0.66 |
| 593 | CUL1      | Cullin-1                                                                  | 0.66 |
| 594 | CHMP4A    | Charged multivesicular body protein 4a                                    | 0.66 |
| 595 | ATP6V1A   | V-type proton ATPase catalytic subunit A                                  | 0.66 |
| 596 | GLRX3     | Glutaredoxin-3                                                            | 0.66 |
| 597 | EIF3E     | Eukaryotic translation initiation factor 3 subunit E                      | 0.66 |
| 598 | TUBB2A    | Tubulin beta-2A chain                                                     | 0.66 |
| 599 | HMGB2     | High mobility group protein B2                                            | 0.66 |

|     |           |                                                                       |      |
|-----|-----------|-----------------------------------------------------------------------|------|
| 600 | ATP6V1B2  | V-type proton ATPase subunit B, brain isoform                         | 0.66 |
| 601 | DYNC1I1   | Cytoplasmic dynein 1 intermediate chain 1                             | 0.66 |
| 602 | EDC4      | Enhancer of mRNA-decapping protein 4                                  | 0.66 |
| 603 | LGALSL    | Galectin-related protein                                              | 0.66 |
| 604 | ANXA1     | Annexin                                                               | 0.66 |
| 605 | USP5      | Ubiquitin carboxyl-terminal hydrolase 5                               | 0.66 |
| 606 | FAHD2B    | Fumarylacetoacetate hydrolase domain-containing protein 2B            | 0.66 |
| 607 | RRM2      | Ribonucleoside-diphosphate reductase subunit M2                       | 0.66 |
| 608 | DCUN1D5   | DCN1-like protein 5                                                   | 0.66 |
| 609 | MAP1LC3B  | Microtubule-associated protein 1 light chain 3 beta, isoform CRA_f    | 0.66 |
| 610 | DPYSL5    | Dihydropyrimidinase-related protein 5                                 | 0.66 |
| 611 | ATP1B3    | Sodium/potassium-transporting ATPase subunit beta-3                   | 0.66 |
| 612 | MARCKSL1  | MARCKS-related protein                                                | 0.66 |
| 613 | ZFR       | Zinc finger RNA-binding protein                                       | 0.66 |
| 614 | RUFY1     | RUN and FYVE domain-containing protein 1                              | 0.66 |
| 615 | IPO4      | Importin-4                                                            | 0.66 |
| 616 | DNPH1     | 2'-deoxynucleoside 5'-phosphate N-hydrolase 1                         | 0.66 |
| 617 | XPO5      | Exportin-5                                                            | 0.66 |
| 618 | DNAJA2    | DnaJ homolog subfamily A member 2                                     | 0.66 |
| 619 | CUL5      | Cullin-5                                                              | 0.66 |
| 620 | NAA10     | N-alpha-acetyltransferase 10                                          | 0.66 |
| 621 | GTF3C5    | General transcription factor 3C polypeptide 5                         | 0.66 |
| 622 | TRMT112   | Multifunctional methyltransferase subunit TRM112-like protein         | 0.66 |
| 623 | RBMX      | RNA-binding motif protein, X chromosome                               | 0.66 |
| 624 | TECR      | Very-long-chain enoyl-CoA reductase                                   | 0.66 |
| 625 | COPB1     | Coatomer subunit beta                                                 | 0.66 |
| 626 | PSME3     | Proteasome activator complex subunit 3                                | 0.66 |
| 627 | HMOX1     | Heme oxygenase 1                                                      | 0.66 |
| 628 | DPYSL2    | Dihydropyrimidinase-related protein 2                                 | 0.65 |
| 629 | GTF2IRD2B | General transcription factor II-I repeat domain-containing protein 2B | 0.65 |
| 630 | KPNA2     | Importin subunit alpha-1                                              | 0.65 |
| 631 | MARCKS    | Myristoylated alanine-rich C-kinase substrate                         | 0.65 |
| 632 | LAMTOR1   | Ragulator complex protein LAMTOR1                                     | 0.65 |
| 633 | DNAJC7    | DnaJ homolog subfamily C member 7                                     | 0.65 |
| 634 | AQP3      | Aquaporin-3                                                           | 0.65 |
| 635 | ALDH1A2   | Retinal dehydrogenase 2                                               | 0.65 |
| 636 | HM13      | Minor histocompatibility antigen H13                                  | 0.65 |
| 637 | MBD3      | Methyl-CpG-binding domain protein 3                                   | 0.65 |
| 638 | YWHAH     | 14-3-3 protein eta                                                    | 0.65 |
| 639 | ARF3      | ADP-ribosylation factor 3                                             | 0.65 |
| 640 | PDS5A     | Sister chromatid cohesion protein PDS5 homolog A                      | 0.65 |
| 641 | HDAC1     | Histone deacetylase 1                                                 | 0.65 |
| 642 | SRP9      | Signal recognition particle 9 kDa protein                             | 0.65 |
| 643 | ATP5H     | ATP synthase subunit d, mitochondrial                                 | 0.65 |
| 644 | RPL13A    | 60S ribosomal protein L13a                                            | 0.65 |
| 645 | PAPOLA    | Poly(A) polymerase alpha                                              | 0.65 |
| 646 | ARPC2     | Actin-related protein 2/3 complex subunit 2                           | 0.65 |
| 647 | BCLAF1    | Bcl-2-associated transcription factor 1                               | 0.65 |
| 648 | AARS2     | Alanine--tRNA ligase, mitochondrial                                   | 0.65 |
| 649 | RAB7A     | Ras-related protein Rab-7a                                            | 0.65 |
| 650 | NAA10     | N-alpha-acetyltransferase 10                                          | 0.65 |
| 651 | DARS      | Aspartate--tRNA ligase, cytoplasmic                                   | 0.65 |
| 652 | TDP1      | Tyrosyl-DNA phosphodiesterase 1                                       | 0.65 |
| 653 | DYNC1LI1  | Cytoplasmic dynein 1 light intermediate chain 1                       | 0.65 |
| 654 | ARIH1     | E3 ubiquitin-protein ligase ARIH1                                     | 0.65 |



|     |          |                                                                             |      |
|-----|----------|-----------------------------------------------------------------------------|------|
| 655 | CLUH     | Clustered mitochondria protein homolog                                      | 0.64 |
| 656 | ACPI     | Acid phosphatase 1, soluble, isoform CRA_d                                  | 0.64 |
| 657 | SNX6     | Sorting nexin                                                               | 0.64 |
| 658 | RPL36    | 60S ribosomal protein L36                                                   | 0.64 |
| 659 | UBAP2L   | Ubiquitin-associated protein 2-like                                         | 0.64 |
| 660 | ARF5     | ADP-ribosylation factor 5                                                   | 0.64 |
| 661 | CDK5RAP3 | CDK5 regulatory subunit-associated protein 3                                | 0.64 |
| 662 | PITPNB   | Phosphatidylinositol transfer protein beta isoform                          | 0.64 |
| 663 | VAMP7    | Vesicle-associated membrane protein 7                                       | 0.64 |
| 664 | PRPF40A  | Pre-mRNA-processing factor 40 homolog A                                     | 0.64 |
| 665 | PUS7     | Pseudouridylate synthase 7 homolog                                          | 0.64 |
| 666 | CAP1     | Adenylyl cyclase-associated protein 1                                       | 0.64 |
| 667 | UBXN1    | UBX domain-containing protein 1                                             | 0.64 |
| 668 | SHTN1    | Shootin-1                                                                   | 0.64 |
| 669 | HDLBP    | High density lipoprotein binding protein (Vigilin), isoform CRA_a           | 0.64 |
| 670 | CDC73    | Parafibromin                                                                | 0.64 |
| 671 | RPL38    | 60S ribosomal protein L38                                                   | 0.64 |
| 672 | DDA1     | DET1- and DDB1-associated protein 1                                         | 0.64 |
| 673 | THOC6    | THO complex subunit 6 homolog                                               | 0.64 |
| 674 | URM1     | Ubiquitin-related modifier 1                                                | 0.64 |
| 675 | QKI      | Protein quaking                                                             | 0.64 |
| 676 | NPIPA2   | Nuclear pore complex-interacting protein family member A2                   | 0.64 |
| 677 | TMOD3    | Tropomodulin-3                                                              | 0.64 |
| 678 | LRRC47   | Leucine-rich repeat-containing protein 47                                   | 0.64 |
| 679 | OGDH     | 2-oxoglutarate dehydrogenase, mitochondrial                                 | 0.64 |
| 680 | ALDH1B1  | Aldehyde dehydrogenase X, mitochondrial                                     | 0.64 |
| 681 | CCAR2    | Cell cycle and apoptosis regulator protein 2                                | 0.63 |
| 682 | UGDH     | UDP-glucose 6-dehydrogenase                                                 | 0.63 |
| 683 | PPA2     | Inorganic pyrophosphatase 2, mitochondrial                                  | 0.63 |
| 684 | SBDS     | Ribosome maturation protein SBDS                                            | 0.63 |
| 685 | DARS     | Aspartate--tRNA ligase, cytoplasmic                                         | 0.63 |
| 686 | HBS1L    | HBS1-like protein                                                           | 0.63 |
| 687 | STAU1    | Double-stranded RNA-binding protein Staufen homolog 1                       | 0.63 |
| 688 | ALDH7A1  | Alpha-aminoacidic semialdehyde dehydrogenase                                | 0.63 |
| 689 | CDK2     | Cyclin-dependent kinase 2                                                   | 0.63 |
| 690 | KIF11    | Kinesin-like protein KIF11                                                  | 0.63 |
| 691 | WDR82    | WD repeat-containing protein 82                                             | 0.63 |
| 692 | MAT2B    | Methionine adenosyltransferase 2 subunit beta                               | 0.63 |
| 693 | SART3    | Squamous cell carcinoma antigen recognized by T-cells 3                     | 0.63 |
| 694 | MRI1     | Methylthioribose-1-phosphate isomerase                                      | 0.63 |
| 695 | RPL7     | 60S ribosomal protein L7                                                    | 0.63 |
| 696 | AKAP1    | A-kinase anchor protein 1, mitochondrial                                    | 0.63 |
| 697 | CNOT1    | CCR4-NOT transcription complex subunit 1                                    | 0.63 |
| 698 | TWF1     | Twinfilin-1                                                                 | 0.63 |
| 699 | PPP3CA   | Serine/threonine-protein phosphatase                                        | 0.63 |
| 700 | DAD1     | Dolichyl-diphosphooligosaccharide--protein glycosyltransferase subunit DAD1 | 0.63 |
| 701 | GPKOW    | G patch domain and KOW motifs-containing protein                            | 0.63 |
| 702 | SCP2     | Non-specific lipid-transfer protein                                         | 0.63 |
| 703 | CUL3     | Cullin-3                                                                    | 0.63 |
| 704 | PACSN2   | Protein kinase C and casein kinase substrate in neurons protein 2           | 0.63 |
| 705 | COPS4    | COP9 signalosome complex subunit 4                                          | 0.63 |
| 706 | C15orf57 | Uncharacterized protein C15orf57                                            | 0.63 |
| 707 | PSMD8    | 26S proteasome non-ATPase regulatory subunit 8                              | 0.63 |
| 708 | SCLY     | Selenocysteine lyase                                                        | 0.63 |
| 709 | PAFAH1B3 | Platelet-activating factor acetylhydrolase IB subunit gamma                 | 0.63 |

|     |         |                                                                                    |      |
|-----|---------|------------------------------------------------------------------------------------|------|
| 710 | PSMD7   | 26S proteasome non-ATPase regulatory subunit 7                                     | 0.62 |
| 711 | PPIH    | Peptidyl-prolyl cis-trans isomerase                                                | 0.62 |
| 712 | MYO15A  | Unconventional myosin-XV                                                           | 0.62 |
| 713 | VAMP2   | Vesicle-associated membrane protein 2                                              | 0.62 |
| 714 | AP2A1   | AP-2 complex subunit alpha-1                                                       | 0.62 |
| 715 | H2AFY2  | Histone H2A                                                                        | 0.62 |
| 716 | ESYT1   | Extended synaptotagmin-1                                                           | 0.62 |
| 717 | PHPT1   | 14 kDa phosphohistidine phosphatase                                                | 0.62 |
| 718 | DRG2    | Developmentally-regulated GTP-binding protein 2                                    | 0.62 |
| 719 | NRDC    | Nardilysin                                                                         | 0.62 |
| 720 | AGBL4   | Cytosolic carboxypeptidase 6                                                       | 0.62 |
| 721 | PES1    | Pescadillo homolog                                                                 | 0.62 |
| 722 | HAGH    | Hydroxyacylglutathione hydrolase, mitochondrial                                    | 0.62 |
| 723 | PFDN2   | Prefoldin subunit 2                                                                | 0.62 |
| 724 | RAB6B   | Ras-related protein Rab-6B                                                         | 0.62 |
| 725 | POLR2A  | DNA-directed RNA polymerase subunit                                                | 0.62 |
| 726 | COPG1   | Coatomer subunit gamma-1                                                           | 0.62 |
| 727 | MTA1    | Metastasis-associated protein MTA1                                                 | 0.62 |
| 728 | ZNF513  | Zinc finger protein 513                                                            | 0.62 |
| 729 | MAT2B   | Methionine adenosyltransferase 2 subunit beta                                      | 0.62 |
| 730 | RPP30   | Ribonuclease P protein subunit p30                                                 | 0.62 |
| 731 | UFC1    | Ubiquitin-fold modifier-conjugating enzyme 1                                       | 0.62 |
| 732 | SMARCE1 | SWI/SNF-related matrix-associated actin-dependent regulator of chromatin subfamily | 0.62 |
| 733 | CDK4    | Cyclin-dependent kinase 4                                                          | 0.62 |
| 734 | POLR1C  | DNA-directed RNA polymerases I and III subunit RPAC1                               | 0.62 |
| 735 | PGM2    | Phosphoglucomutase-2                                                               | 0.61 |
| 736 | HDAC2   | Histone deacetylase 2                                                              | 0.61 |
| 737 | TPM2    | Tropomyosin beta chain                                                             | 0.61 |
| 738 | SEC24C  | Protein transport protein Sec24C                                                   | 0.61 |
| 739 | DCAF7   | DDB1- and CUL4-associated factor 7                                                 | 0.61 |
| 740 | HUWE1   | E3 ubiquitin-protein ligase HUWE1                                                  | 0.61 |
| 741 | UBE2T   | Ubiquitin-conjugating enzyme E2 T                                                  | 0.61 |
| 742 | PRRC2C  | Protein PRRC2C                                                                     | 0.61 |
| 743 | ZNF345  | Zinc finger protein 345                                                            | 0.61 |
| 744 | MRPS28  | 28S ribosomal protein S28, mitochondrial                                           | 0.61 |
| 745 | DARS2   | Aspartate--tRNA ligase, mitochondrial                                              | 0.61 |
| 746 | TOP2A   | DNA topoisomerase 2-alpha                                                          | 0.61 |
| 747 | EPB41L3 | Band 4.1-like protein 3                                                            | 0.61 |
| 748 | EIF3K   | Eukaryotic translation initiation factor 3 subunit K                               | 0.61 |
| 749 | BSG     | Basigin                                                                            | 0.61 |
| 750 | SRP54   | Signal recognition particle 54 kDa protein                                         | 0.61 |
| 751 | UBA52   | Ubiquitin-60S ribosomal protein L40                                                | 0.61 |
| 752 | NUP205  | Nuclear pore complex protein Nup205                                                | 0.61 |
| 753 | MYD88   | Myeloid differentiation primary response protein MyD88                             | 0.61 |
| 754 | ENAH    | Protein enabled homolog                                                            | 0.61 |
| 755 | COX7A2  | Cytochrome c oxidase subunit 7A2, mitochondrial                                    | 0.61 |
| 756 | CALM2   | Calmodulin                                                                         | 0.61 |
| 757 | UQCRC2  | Cytochrome b-c1 complex subunit 2, mitochondrial                                   | 0.61 |
| 758 | MRPS23  | 28S ribosomal protein S23, mitochondrial                                           | 0.61 |
| 759 | IQGAP1  | Ras GTPase-activating-like protein IQGAP1                                          | 0.61 |
| 760 | SDF4    | 45 kDa calcium-binding protein                                                     | 0.61 |
| 761 | KPNA4   | Importin subunit alpha-3                                                           | 0.61 |
| 762 | TRA2B   | Transformer-2 protein homolog beta                                                 | 0.61 |
| 763 | CPOX    | Oxygen-dependent coproporphyrinogen-III oxidase, mitochondrial                     | 0.61 |
| 764 | PMM2    | Phosphomannomutase                                                                 | 0.61 |

|     |              |                                                               |      |
|-----|--------------|---------------------------------------------------------------|------|
| 765 | CFDP1        | Craniofacial development protein 1                            | 0.61 |
| 766 | PCK2         | Phosphoenolpyruvate carboxykinase [GTP], mitochondrial        | 0.61 |
| 767 | IPO8         | Importin-8                                                    | 0.61 |
| 768 | LOC105372343 | Uncharacterized protein                                       | 0.61 |
| 769 | PHB2         | Prohibitin-2                                                  | 0.61 |
| 770 | DDX54        | ATP-dependent RNA helicase DDX54                              | 0.61 |
| 771 | MRPL13       | 39S ribosomal protein L13, mitochondrial                      | 0.61 |
| 772 | TTN          | Titin                                                         | 0.61 |
| 773 | SH3BGRL3     | SH3 domain-binding glutamic acid-rich-like protein 3          | 0.61 |
| 774 | MOCS2        | Molybdopterin synthase sulfur carrier subunit                 | 0.61 |
| 775 | POLR2J3      | DNA-directed RNA polymerase II subunit RPB11-b2               | 0.61 |
| 776 | WNK1         | Serine/threonine-protein kinase WNK1                          | 0.60 |
| 777 | PABPC1       | Polyadenylate-binding protein 1                               | 0.60 |
| 778 | RPUSD3       | RNA pseudouridylate synthase domain-containing protein 3      | 0.60 |
| 779 | IFT27        | Intraflagellar transport protein 27 homolog                   | 0.60 |
| 780 | UGDH         | UDP-glucose 6-dehydrogenase                                   | 0.60 |
| 781 | RAB11B       | Ras-related protein Rab-11B                                   | 0.60 |
| 782 | RRM2         | Ribonucleoside-diphosphate reductase subunit M2               | 0.60 |
| 783 | RAP1GDS1     | Rap1 GTPase-GDP dissociation stimulator 1                     | 0.60 |
| 784 | SH3D19       | SH3 domain-containing protein 19                              | 0.60 |
| 785 | SNRNP40      | Small Nuclear Ribonucleoprotein U5 Subunit 40                 | 0.60 |
| 786 | PAF1         | RNA polymerase II-associated factor 1 homolog                 | 0.60 |
| 787 | RBBP5        | Retinoblastoma-binding protein 5                              | 0.60 |
| 788 | ZCCHC11      | Terminal uridylyltransferase 4                                | 0.60 |
| 789 | SMC2         | Structural maintenance of chromosomes protein 2               | 0.60 |
| 790 | SLC16A5      | Monocarboxylate transporter 6                                 | 0.60 |
| 791 | RRM1         | Ribonucleoside-diphosphate reductase large subunit            | 0.60 |
| 792 | STAT1        | Signal transducer and activator of transcription              | 0.60 |
| 793 | TCOF1        | Treacle protein                                               | 0.60 |
| 794 | DOCK2        | Dedicator of cytokinesis protein 2                            | 0.60 |
| 795 | CDR2L        | Cerebellar degeneration-related protein 2-like                | 0.60 |
| 796 | SMU1         | WD40 repeat-containing protein SMU1                           | 0.59 |
| 797 | RAE1         | mRNA export factor                                            | 0.59 |
| 798 | STAT1        | Signal transducer and activator of transcription 1-alpha/beta | 0.59 |
| 799 | TBCD         | Tubulin-specific chaperone D                                  | 0.59 |
| 800 | TSR1         | Pre-rRNA-processing protein TSR1 homolog                      | 0.59 |
| 801 | KDM7A        | Lysine-specific demethylase 7A                                | 0.59 |
| 802 | ATP5J2-PTCD1 | ATP5J2-PTCD1 readthrough                                      | 0.59 |
| 803 | TWF1         | Twinfilin-1                                                   | 0.59 |
| 804 | KIF2A        | Kinesin-like protein KIF2A                                    | 0.59 |
| 805 | OSBP         | Oxysterol-binding protein 1                                   | 0.59 |
| 806 | GULP1        | PTB domain-containing engulfment adapter protein 1            | 0.59 |
| 807 | EFHD1        | EF-hand domain-containing protein D1                          | 0.59 |
| 808 | GINS2        | DNA replication complex GINS protein PSF2                     | 0.59 |
| 809 | GNPDA1       | Glucosamine-6-phosphate isomerase 1                           | 0.59 |
| 810 | RPRD1A       | Regulation of nuclear pre-mRNA domain-containing protein 1A   | 0.59 |
| 811 | HBS1L        | HBS1-like protein                                             | 0.59 |
| 812 | PSMD11       | 26S proteasome non-ATPase regulatory subunit 11               | 0.59 |
| 813 | RAB11A       | Ras-related protein Rab-11A                                   | 0.59 |
| 814 | COX5B        | Cytochrome c oxidase subunit 5B, mitochondrial                | 0.59 |
| 815 | NOC4L        | Nucleolar complex protein 4 homolog                           | 0.59 |
| 816 | DRAP1        | Dr1-associated corepressor                                    | 0.59 |
| 817 | PPP1R12A     | Protein phosphatase 1 regulatory subunit 12A                  | 0.59 |
| 818 | FASN         | Fatty acid synthase                                           | 0.59 |
| 819 | RPS16        | 40S ribosomal protein S16                                     | 0.58 |

|     |          |                                                                    |      |
|-----|----------|--------------------------------------------------------------------|------|
| 820 | SND1     | Staphylococcal nuclease domain-containing protein 1                | 0.58 |
| 821 | GLA      | Alpha-galactosidase A                                              | 0.58 |
| 822 | CDC27    | Cell division cycle protein 27 homolog                             | 0.58 |
| 823 | RPAP3    | RNA polymerase II-associated protein 3                             | 0.58 |
| 824 | SLC25A44 | Solute carrier family 25 member 44                                 | 0.58 |
| 825 | RPL26    | 60S ribosomal protein L26                                          | 0.58 |
| 826 | MSTO1    | Protein misato homolog 1                                           | 0.58 |
| 827 | PAAF1    | Proteasomal ATPase-associated factor 1                             | 0.58 |
| 828 | MCCC2    | Methylcrotonoyl-CoA carboxylase beta chain, mitochondrial          | 0.58 |
| 829 | WDR70    | WD repeat-containing protein 70                                    | 0.58 |
| 830 | CKAP5    | Cytoskeleton-associated protein 5                                  | 0.58 |
| 831 | TUBB3    | HCG1983504, isoform CRA_d                                          | 0.58 |
| 832 | TRMT1    | tRNA (guanine(26)-N(2))-dimethyltransferase                        | 0.58 |
| 833 | NUDC     | Nuclear migration protein nudC                                     | 0.58 |
| 834 | TRIT1    | tRNA dimethylallyltransferase, mitochondrial                       | 0.58 |
| 835 | PELP1    | Proline-, glutamic acid- and leucine-rich protein 1                | 0.58 |
| 836 | FANCI    | Fanconi anemia group I protein                                     | 0.58 |
| 837 | NDUFA5   | NADH dehydrogenase [ubiquinone] 1 alpha subcomplex subunit 5       | 0.58 |
| 838 | DHX16    | Putative pre-mRNA-splicing factor ATP-dependent RNA helicase DHX16 | 0.58 |
| 839 | CKAP5    | Cytoskeleton-associated protein 5                                  | 0.58 |
| 840 | SAR1A    | GTP-binding protein SAR1a                                          | 0.58 |
| 841 | WDHD1    | WD repeat and HMG-box DNA-binding protein 1                        | 0.58 |
| 842 | KPNA6    | Importin subunit alpha-7                                           | 0.58 |
| 843 | UBFD1    | Ubiquitin domain-containing protein UBFD1                          | 0.58 |
| 844 | RRBP1    | Ribosome-binding protein 1                                         | 0.58 |
| 845 | MAPRE2   | Microtubule-associated protein RP/EB family member 2               | 0.58 |
| 846 | TP53RK   | TP53-regulating kinase                                             | 0.58 |
| 847 | SNCA     | Alpha-synuclein                                                    | 0.58 |
| 848 | PELO     | Protein pelota homolog                                             | 0.58 |
| 849 | MICALL1  | MICAL-like protein 1                                               | 0.58 |
| 850 | DTYMK    | Thymidylate kinase                                                 | 0.58 |
| 851 | UBE2Z    | Ubiquitin-conjugating enzyme E2 Z                                  | 0.58 |
| 852 | ATXN2    | Ataxin-2                                                           | 0.57 |
| 853 | NOL9     | Polynucleotide 5'-hydroxyl-kinase NOL9                             | 0.57 |
| 854 | TBCE     | Tubulin-specific chaperone E                                       | 0.57 |
| 855 | ATG3     | Ubiquitin-like-conjugating enzyme ATG3                             | 0.57 |
| 856 | ATXN2L   | Ataxin-2-like protein                                              | 0.57 |
| 857 | LSM7     | U6 snRNA-associated Sm-like protein LSM7                           | 0.57 |
| 858 | NIP7     | 60S ribosome subunit biogenesis protein NIP7 homolog               | 0.57 |
| 859 | PITPNA   | Phosphatidylinositol transfer protein alpha isoform                | 0.57 |
| 860 | THOC3    | THO complex subunit 3                                              | 0.57 |
| 861 | IMMT     | MICOS complex subunit MIC60                                        | 0.57 |
| 862 | RPS13    | 40S ribosomal protein S13                                          | 0.57 |
| 863 | PFDN5    | Prefoldin subunit 5                                                | 0.57 |
| 864 | PDZRN4   | PDZ domain-containing RING finger protein 4                        | 0.57 |
| 865 | ELP3     | Elongator complex protein 3                                        | 0.56 |
| 866 | RAD18    | E3 ubiquitin-protein ligase RAD18                                  | 0.56 |
| 867 | ABCD3    | ATP-binding cassette sub-family D member 3                         | 0.56 |
| 868 | LAS1L    | Ribosomal biogenesis protein LAS1L                                 | 0.56 |
| 869 | UTP14A   | U3 small nucleolar RNA-associated protein 14 homolog A             | 0.56 |
| 870 | SPEN     | Msx2-interacting protein                                           | 0.56 |
| 871 | FAM184B  | Protein FAM184B                                                    | 0.56 |
| 872 | CMPK1    | UMP-CMP kinase                                                     | 0.56 |
| 873 | PRKAR2A  | cAMP-dependent protein kinase type II-alpha regulatory subunit     | 0.56 |
| 874 | BCAP31   | B-cell receptor-associated protein 31                              | 0.56 |

|     |          |                                                          |      |
|-----|----------|----------------------------------------------------------|------|
| 875 | FXN      | Frataxin, mitochondrial                                  | 0.56 |
| 876 | CACNG6   | Voltage-dependent calcium channel gamma-6 subunit        | 0.56 |
| 877 | COLGALT1 | Procollagen galactosyltransferase 1                      | 0.56 |
| 878 | MED29    | Intersex-like (Drosophila)                               | 0.56 |
| 879 | ZNF503   | Zinc finger protein 503                                  | 0.56 |
| 880 | PYCR2    | Pyrroline-5-carboxylate reductase 2                      | 0.56 |
| 881 | TPM4     | Tropomyosin alpha-4 chain                                | 0.56 |
| 882 | FAM98A   | Protein FAM98A                                           | 0.56 |
| 883 | SHCBP1L  | Testicular spindle-associated protein SHCBP1L            | 0.56 |
| 884 | BCAT1    | Branched-chain-amino-acid aminotransferase, cytosolic    | 0.56 |
| 885 | PIN4     | Peptidyl-prolyl cis-trans isomerase NIMA-interacting 4   | 0.56 |
| 886 | TXLNA    | Alpha-taxilin                                            | 0.55 |
| 887 | DSP      | Desmoplakin                                              | 0.55 |
| 888 | CFAP36   | Cilia- and flagella-associated protein 36                | 0.55 |
| 889 | NUMA1    | Nuclear mitotic apparatus protein 1                      | 0.55 |
| 890 | NOB1     | RNA-binding protein NOB1                                 | 0.55 |
| 891 | VPS4A    | Vacuolar protein sorting-associated protein 4A           | 0.55 |
| 892 | GRIPAP1  | GRIP1-associated protein 1                               | 0.55 |
| 893 | ATP6V1G1 | V-type proton ATPase subunit G 1                         | 0.55 |
| 894 | NUDT15   | Nucleotide triphosphate diphosphatase NUDT15             | 0.55 |
| 895 | EEF1E1   | Eukaryotic translation elongation factor 1 epsilon-1     | 0.55 |
| 896 | TSEN34   | tRNA-splicing endonuclease subunit Sen34                 | 0.55 |
| 897 | NCKAP1   | Nck-associated protein 1                                 | 0.55 |
| 898 | ACO1     | Cytoplasmic aconitate hydratase                          | 0.55 |
| 899 | CUL2     | Cullin-2                                                 | 0.55 |
| 900 | RGPD8    | RANBP2-like and GRIP domain-containing protein 8         | 0.55 |
| 901 | UBAP2L   | Ubiquitin-associated protein 2-like                      | 0.55 |
| 902 | DDX56    | DEAD (Asp-Glu-Ala-Asp) box polypeptide 56, isoform CRA_a | 0.55 |
| 903 | WDR19    | WD repeat-containing protein 19                          | 0.55 |
| 904 | MRPS5    | 28S ribosomal protein S5, mitochondrial                  | 0.55 |
| 905 | PGRMC1   | Membrane-associated progesterone receptor component 1    | 0.55 |
| 906 | IPO11    | Importin-11                                              | 0.55 |
| 907 | CNBP     | Cellular nucleic acid-binding protein                    | 0.55 |
| 908 | ATP6V1C1 | V-type proton ATPase subunit C 1                         | 0.54 |
| 909 | LYPLA2   | Acyl-protein thioesterase 2                              | 0.54 |
| 910 | TACC3    | Transforming acidic coiled-coil-containing protein 3     | 0.54 |
| 911 | KYAT3    | Kynurenine--oxoglutarate transaminase 3                  | 0.54 |
| 912 | DHX57    | Putative ATP-dependent RNA helicase DHX57                | 0.54 |
| 913 | ANKRD1   | Ankyrin repeat domain-containing protein 1               | 0.54 |
| 914 | PFDN5    | Prefoldin subunit 5                                      | 0.54 |
| 915 | HAS1     | Hyaluronan synthase 1                                    | 0.54 |
| 916 | ENAH     | Protein enabled homolog                                  | 0.54 |
| 917 | NOLC1    | Nucleolar and coiled-body phosphoprotein 1               | 0.54 |
| 918 | HRAS     | GTPase HRas                                              | 0.54 |
| 919 | PRPF38B  | Pre-mRNA-splicing factor 38B                             | 0.54 |
| 920 | DSTN     | Destrin                                                  | 0.54 |
| 921 | APEH     | Acylamino-acid-releasing enzyme                          | 0.54 |
| 922 | ASH2L    | Set1/Ash2 histone methyltransferase complex subunit ASH2 | 0.54 |
| 923 | GTF2F1   | General transcription factor IIF subunit 1               | 0.54 |
| 924 | TRIM28   | Transcription intermediary factor 1-beta                 | 0.54 |
| 925 | HIBADH   | 3-hydroxyisobutyrate dehydrogenase, mitochondrial        | 0.54 |
| 926 | COASY    | Bifunctional coenzyme A synthase                         | 0.54 |
| 927 | PGP      | Glycerol-3-phosphate phosphatase                         | 0.54 |
| 928 | EED      | Polycomb protein EED                                     | 0.54 |
| 929 | MRPL43   | 39S ribosomal protein L43, mitochondrial                 | 0.54 |

|     |             |                                                                  |      |
|-----|-------------|------------------------------------------------------------------|------|
| 930 | LIMA1       | LIM domain and actin-binding protein 1                           | 0.54 |
| 931 | GNB2        | Guanine nucleotide-binding protein G(I)/G(S)/G(T) subunit beta-2 | 0.53 |
| 932 | RPL21       | 60S ribosomal protein L21                                        | 0.53 |
| 933 | PRPF6       | Pre-mRNA-processing factor 6                                     | 0.53 |
| 934 | CCM2L       | Cerebral cavernous malformations 2 protein-like                  | 0.53 |
| 935 | CHMP2B      | Charged multivesicular body protein 2b                           | 0.53 |
| 936 | HES1        | Transcription factor HES-1                                       | 0.53 |
| 937 | SNX1        | Sorting nexin-1                                                  | 0.53 |
| 938 | SNX3        | Sorting nexin-3                                                  | 0.53 |
| 939 | MESDC2      | LDLR chaperone MESD                                              | 0.53 |
| 940 | AP2A2       | AP-2 complex subunit alpha-2                                     | 0.53 |
| 941 | CPSF7       | Cleavage and polyadenylation-specificity factor subunit 7        | 0.53 |
| 942 | GEMIN4      | Gem-associated protein 4                                         | 0.53 |
| 943 | UBR5        | E3 ubiquitin-protein ligase UBR5                                 | 0.53 |
| 944 | ANXA2       | Annexin A2                                                       | 0.53 |
| 945 | NIPSNAP1    | Protein NipSnap homolog 1                                        | 0.53 |
| 946 | KIF1BP      | KIF1-binding protein                                             | 0.53 |
| 947 | POLR1A      | DNA-directed RNA polymerase subunit                              | 0.53 |
| 948 | MYO18A      | Unconventional myosin-XVIIIa                                     | 0.53 |
| 949 | LAGE3       | EKC/KEOPS complex subunit LAGE3                                  | 0.53 |
| 950 | AP1M1       | AP-1 complex subunit mu-1                                        | 0.52 |
| 951 | MCM4        | DNA replication licensing factor MCM4                            | 0.52 |
| 952 | ARL1        | ADP-ribosylation factor-like protein 1                           | 0.52 |
| 953 | SH3KBP1     | SH3 domain-containing kinase-binding protein 1                   | 0.52 |
| 954 | TYMS        | Thymidylate synthase                                             | 0.52 |
| 955 | LASP1       | LIM and SH3 domain protein 1                                     | 0.52 |
| 956 | PLOD2       | Procollagen-lysine,2-oxoglutarate 5-dioxygenase 2                | 0.52 |
| 957 | AMPD2       | AMP deaminase 2                                                  | 0.52 |
| 958 | ABCF1       | ATP-binding cassette sub-family F member 1                       | 0.52 |
| 959 | NXN         | Nucleoredoxin                                                    | 0.52 |
| 960 | GPATCH4     | G patch domain-containing protein 4                              | 0.52 |
| 961 | MRPL58      | Peptidyl-tRNA hydrolase ICT1, mitochondrial                      | 0.52 |
| 962 | AKAP6       | A-kinase anchor protein 6                                        | 0.52 |
| 963 | COIL        | Coilin                                                           | 0.52 |
| 964 | CORO7-PAM16 | Coronin                                                          | 0.52 |
| 965 | TXN2        | Thioredoxin, mitochondrial                                       | 0.52 |
| 966 | COPZ1       | Coatomer subunit zeta-1                                          | 0.52 |
| 967 | TTC19       | Tetratricopeptide repeat protein 19, mitochondrial               | 0.52 |
| 968 | GIPC1       | PDZ domain-containing protein GIPC1                              | 0.52 |
| 969 | NUP133      | Nuclear pore complex protein Nup133                              | 0.52 |
| 970 | EMC2        | ER membrane protein complex subunit 2                            | 0.52 |
| 971 | EIF3H       | Eukaryotic translation initiation factor 3 subunit H             | 0.51 |
| 972 | MAP2K1      | Dual specificity mitogen-activated protein kinase kinase 1       | 0.51 |
| 973 | CIAPIN1     | Anamorsin                                                        | 0.51 |
| 974 | PARD3B      | Partitioning defective 3 homolog B                               | 0.51 |
| 975 | ARGLU1      | Arginine and glutamate-rich protein 1                            | 0.51 |
| 976 | DUS1L       | tRNA-dihydrouridine(16/17) synthase [NAD(P)(+)]-like             | 0.51 |
| 977 | NUP98       | Nuclear pore complex protein Nup98-Nup96                         | 0.51 |
| 978 | IFT172      | Intraflagellar transport protein 172 homolog                     | 0.51 |
| 979 | TCAF1       | TRPM8 channel-associated factor 1                                | 0.51 |
| 980 | TRIP12      | E3 ubiquitin-protein ligase TRIP12                               | 0.51 |
| 981 | SRPK2       | SRSF protein kinase 2                                            | 0.51 |
| 982 | TMED9       | Transmembrane emp24 domain-containing protein 9                  | 0.51 |
| 983 | SUMO1       | Small ubiquitin-related modifier 1                               | 0.51 |
| 984 | PSMG1       | Proteasome assembly chaperone 1                                  | 0.51 |

|      |          |                                                                            |      |
|------|----------|----------------------------------------------------------------------------|------|
| 985  | ANAPC7   | Anaphase-promoting complex subunit 7                                       | 0.51 |
| 986  | RALA     | Ras-related protein Ral-A                                                  | 0.51 |
| 987  | MRPL1    | 39S ribosomal protein L1, mitochondrial                                    | 0.50 |
| 988  | TSPYL1   | Testis-specific Y-encoded-like protein 1                                   | 0.50 |
| 989  | SCRIB    | Protein scribble homolog                                                   | 0.50 |
| 990  | CSTB     | Cystatin-B                                                                 | 0.50 |
| 991  | CDC123   | Cell division cycle protein 123 homolog                                    | 0.50 |
| 992  | TOP2B    | DNA topoisomerase 2                                                        | 0.50 |
| 993  | RRP15    | RRP15-like protein                                                         | 0.50 |
| 994  | PPP3CB   | Serine/threonine-protein phosphatase                                       | 0.50 |
| 995  | KLHL33   | Kelch-like protein 33                                                      | 0.50 |
| 996  | MRPS11   | 28S ribosomal protein S11, mitochondrial                                   | 0.49 |
| 997  | RPL34    | 60S ribosomal protein L34                                                  | 0.49 |
| 998  | MRPL45   | 39S ribosomal protein L45, mitochondrial                                   | 0.49 |
| 999  | ANKS3    | Ankyrin repeat and SAM domain-containing protein 3                         | 0.49 |
| 1000 | CBWD1    | COBW domain-containing protein 1                                           | 0.49 |
| 1001 | ATXN2L   | Ataxin-2-like protein                                                      | 0.49 |
| 1002 | RABGGTA  | Geranylgeranyl transferase type-2 subunit alpha                            | 0.49 |
| 1003 | EEF1E1   | Eukaryotic translation elongation factor 1 epsilon-1                       | 0.49 |
| 1004 | SETD7    | Histone-lysine N-methyltransferase                                         | 0.49 |
| 1005 | ZNF593   | Zinc finger protein 593                                                    | 0.49 |
| 1006 | TPT1     | Translationally-controlled tumor protein                                   | 0.49 |
| 1007 | POR      | NADPH--cytochrome P450 reductase                                           | 0.49 |
| 1008 | RFC1     | Replication factor C subunit 1                                             | 0.49 |
| 1009 | ARL8A    | ADP-ribosylation factor-like protein 8A                                    | 0.49 |
| 1010 | GBF1     | Golgi-specific brefeldin A-resistance guanine nucleotide exchange factor 1 | 0.49 |
| 1011 | EIF2AK2  | Interferon-induced, double-stranded RNA-activated protein kinase           | 0.48 |
| 1012 | MCCC2    | Methylcrotonoyl-CoA carboxylase 2 isoform 1                                | 0.48 |
| 1013 | DIAPH1   | Protein diaphanous homolog 1                                               | 0.48 |
| 1014 | GTF3C4   | General transcription factor 3C polypeptide 4                              | 0.48 |
| 1015 | TOX3     | TOX high mobility group box family member 3                                | 0.48 |
| 1016 | RPL22L1  | 60S ribosomal protein L22-like 1                                           | 0.48 |
| 1017 | NAA16    | N-alpha-acetyltransferase 16, NatA auxiliary subunit                       | 0.48 |
| 1018 | NAPA     | Alpha-soluble NSF attachment protein                                       | 0.47 |
| 1019 | CYB5B    | Cytochrome b5 type B                                                       | 0.47 |
| 1020 | PRKACA   | cAMP-dependent protein kinase catalytic subunit alpha                      | 0.47 |
| 1021 | ACKR2    | Atypical chemokine receptor 2                                              | 0.47 |
| 1022 | EPB41L2  | Band 4.1-like protein 2                                                    | 0.47 |
| 1023 | SAAL1    | Protein SAAL1                                                              | 0.47 |
| 1024 | TRAPPC3  | Trafficking protein particle complex subunit 3                             | 0.47 |
| 1025 | PYROXD2  | Pyridine nucleotide-disulfide oxidoreductase domain-containing protein 2   | 0.47 |
| 1026 | ISYNA1   | Inositol-3-phosphate synthase 1                                            | 0.47 |
| 1027 | NUCB2    | Nucleobindin 2, isoform CRA_b                                              | 0.47 |
| 1028 | SF3B6    | Splicing factor 3B subunit 6                                               | 0.46 |
| 1029 | PRKACB   | cAMP-dependent protein kinase catalytic subunit beta                       | 0.46 |
| 1030 | CPE      | Carboxypeptidase E                                                         | 0.46 |
| 1031 | RPS26P11 | Putative 40S ribosomal protein S26-like 1                                  | 0.46 |
| 1032 | TBC1D15  | TBC1 domain family member 15                                               | 0.46 |
| 1033 | TELO2    | Telomere length regulation protein TEL2 homolog                            | 0.46 |
| 1034 | NME7     | Nucleoside diphosphate kinase 7                                            | 0.46 |
| 1035 | BAG6     | BCL2 Associated Athanogene 6                                               | 0.46 |
| 1036 | NGDN     | Neuroguidin                                                                | 0.46 |
| 1037 | RANBP10  | Ran-binding protein 10                                                     | 0.46 |
| 1038 | MYO5A    | Unconventional myosin-Va                                                   | 0.46 |
| 1039 | PCNT     | Pericentrin                                                                | 0.46 |

|      |          |                                                                                     |      |
|------|----------|-------------------------------------------------------------------------------------|------|
| 1040 | GPD2     | Glycerol-3-phosphate dehydrogenase, mitochondrial                                   | 0.46 |
| 1041 | CKAP4    | Cytoskeleton-associated protein 4                                                   | 0.46 |
| 1042 | NECAP1   | Adaptin ear-binding coat-associated protein 1                                       | 0.45 |
| 1043 | UBC      | Polyubiquitin-C                                                                     | 0.45 |
| 1044 | ASS1     | Argininosuccinate synthase                                                          | 0.45 |
| 1045 | TTC1     | Tetratricopeptide repeat protein 1                                                  | 0.45 |
| 1046 | DHCR24   | Delta(24)-sterol reductase                                                          | 0.45 |
| 1047 | CTNND1   | Catenin delta-1                                                                     | 0.45 |
| 1048 | BZW2     | Basic leucine zipper and W2 domain-containing protein 2                             | 0.45 |
| 1049 | TRIM33   | E3 ubiquitin-protein ligase TRIM33                                                  | 0.45 |
| 1050 | AKT1S1   | Proline-rich AKT1 substrate 1                                                       | 0.45 |
| 1051 | UQCRFS1  | Cytochrome b-c1 complex subunit Rieske, mitochondrial                               | 0.45 |
| 1052 | EPB41L3  | Band 4.1-like protein 3                                                             | 0.44 |
| 1053 | LXN      | Latexin                                                                             | 0.44 |
| 1054 | IMPDH1   | Inosine-5'-monophosphate dehydrogenase                                              | 0.44 |
| 1055 | DPCD     | Protein DPCD                                                                        | 0.44 |
| 1056 | DLAT     | Dihydrolipoyllysine-residue acetyltransferase component of pyruvate dehydrogenase c | 0.44 |
| 1057 | NDUFA9   | NADH dehydrogenase [ubiquinone] 1 alpha subcomplex subunit 9, mitochondrial         | 0.44 |
| 1058 | RAB18    | Ras-related protein Rab-18                                                          | 0.44 |
| 1059 | C18orf25 | Uncharacterized protein C18orf25                                                    | 0.44 |
| 1060 | ARFIP1   | Arfaptin-1                                                                          | 0.44 |
| 1061 | PLK1     | Serine/threonine-protein kinase PLK1                                                | 0.44 |
| 1062 | RPS6KA3  | Ribosomal protein S6 kinase alpha-3                                                 | 0.43 |
| 1063 | RPF2     | Ribosome production factor 2 homolog                                                | 0.43 |
| 1064 | RIF1     | Telomere-associated protein RIF1                                                    | 0.43 |
| 1065 | ECHDC1   | Ethylmalonyl-CoA decarboxylase                                                      | 0.43 |
| 1066 | HSPBP1   | Hsp70-binding protein 1                                                             | 0.43 |
| 1067 | ADPRHL2  | Poly(ADP-ribose) glycohydrolase ARH3                                                | 0.43 |
| 1068 | CHD3     | Chromodomain-helicase-DNA-binding protein 3                                         | 0.42 |
| 1069 | KIFC3    | Kinesin-like protein KIFC3                                                          | 0.42 |
| 1070 | UBE2C    | Ubiquitin-conjugating enzyme E2                                                     | 0.42 |
| 1071 | TUBG1    | Tubulin gamma-1 chain                                                               | 0.42 |
| 1072 | NFATC4   | Nuclear factor of activated T-cells, cytoplasmic 4                                  | 0.42 |
| 1073 | ARHGAP1  | Rho GTPase-activating protein 1                                                     | 0.42 |
| 1074 | PRPF3    | U4/U6 small nuclear ribonucleoprotein Prp3                                          | 0.42 |
| 1075 | FAH      | Fumarylacetoacetase                                                                 | 0.42 |
| 1076 | QKI      | Protein quaking                                                                     | 0.42 |
| 1077 | ARPC3    | Actin-related protein 2/3 complex subunit 3                                         | 0.41 |
| 1078 | NMD3     | 60S ribosomal export protein NMD3                                                   | 0.41 |
| 1079 | FADD     | FAS-associated death domain protein                                                 | 0.41 |
| 1080 | DYNLL1   | Dynein light chain 1, cytoplasmic                                                   | 0.41 |
| 1081 | NCF2     | Neutrophil cytosol factor 2                                                         | 0.41 |
| 1082 | CRK      | Adapter molecule crk                                                                | 0.41 |
| 1083 | NIF3L1   | NIF3-like protein 1                                                                 | 0.41 |
| 1084 | EFHD2    | EF-hand domain-containing protein D2                                                | 0.40 |
| 1085 | FAM117B  | Protein FAM117B                                                                     | 0.40 |
| 1086 | MCMBP    | Mini-chromosome maintenance complex-binding protein                                 | 0.40 |
| 1087 | MRPL11   | 39S ribosomal protein L11, mitochondrial                                            | 0.40 |
| 1088 | STRC     | Stereocilin                                                                         | 0.39 |
| 1089 | STAT3    | Signal transducer and activator of transcription                                    | 0.39 |
| 1090 | SLC39A11 | Zinc transporter ZIP11                                                              | 0.39 |
| 1091 | CCDC12   | Coiled-coil domain containing 12, isoform CRA_a                                     | 0.39 |
| 1092 | AGPS     | Alkylglycerone-phosphate synthase                                                   | 0.39 |
| 1093 | MID1     | E3 ubiquitin-protein ligase Midline-1                                               | 0.39 |
| 1094 | TEX33    | Testis-expressed protein 33                                                         | 0.39 |



|      |         |                                                                                  |      |
|------|---------|----------------------------------------------------------------------------------|------|
| 1095 | MBIP    | MAP3K12-binding inhibitory protein 1                                             | 0.38 |
| 1096 | PRX     | Periaxin                                                                         | 0.38 |
| 1097 | UQCRC1  | Cytochrome b-c1 complex subunit 1, mitochondrial                                 | 0.38 |
| 1098 | MAGEB4  | Melanoma-associated antigen B4                                                   | 0.38 |
| 1099 | LBR     | Lamin-B receptor                                                                 | 0.38 |
| 1100 | AACS    | Acetoacetyl-CoA synthetase                                                       | 0.38 |
| 1101 | CDK7    | Cyclin-dependent kinase 7                                                        | 0.38 |
| 1102 | DDX56   | Probable ATP-dependent RNA helicase DDX56                                        | 0.38 |
| 1103 | PTDSS1  | Phosphatidylserine synthase 1                                                    | 0.38 |
| 1104 | FAM186A | Protein FAM186A                                                                  | 0.38 |
| 1105 | GNAO1   | Guanine nucleotide-binding protein G(o) subunit alpha                            | 0.38 |
| 1106 | USP19   | Ubiquitin carboxyl-terminal hydrolase 19                                         | 0.37 |
| 1107 | ZNF346  | Zinc finger protein 346                                                          | 0.37 |
| 1108 | TRPT1   | tRNA 2'-phosphotransferase 1                                                     | 0.37 |
| 1109 | NVL     | Nuclear valosin-containing protein-like                                          | 0.37 |
| 1110 | PRKAR1A | cAMP-dependent protein kinase type I-alpha regulatory subunit                    | 0.36 |
| 1111 | PLAA    | Phospholipase A-2-activating protein                                             | 0.36 |
| 1112 | SIRT5   | NAD-dependent protein deacylase sirtuin-5, mitochondrial                         | 0.36 |
| 1113 | PDXDC1  | Pyridoxal-dependent decarboxylase domain-containing protein 1                    | 0.36 |
| 1114 | TRNT1   | CCA tRNA nucleotidyltransferase 1, mitochondrial                                 | 0.36 |
| 1115 | MAP7    | Enscosin                                                                         | 0.35 |
| 1116 | HGH1    | Protein HGH1 homolog                                                             | 0.35 |
| 1117 | MRFAP1  | MORF4 family-associated protein 1                                                | 0.35 |
| 1118 | PRR3    | Proline-rich protein 3                                                           | 0.35 |
| 1119 | RNF181  | E3 ubiquitin-protein ligase RNF181                                               | 0.34 |
| 1120 | POLR2B  | DNA-directed RNA polymerase subunit beta                                         | 0.34 |
| 1121 | MAGOH   | Protein mago nashi homolog                                                       | 0.34 |
| 1122 | EIF1AD  | Probable RNA-binding protein EIF1AD                                              | 0.34 |
| 1123 | UPF3B   | Regulator of nonsense transcripts 3B                                             | 0.34 |
| 1124 | POLR2I  | DNA-directed RNA polymerase II subunit RPB9                                      | 0.34 |
| 1125 | FAU     | 40S ribosomal protein S30                                                        | 0.33 |
| 1126 | TXNL1   | Thioredoxin-like protein 1                                                       | 0.33 |
| 1127 | RPN2    | Dolichyl-diphosphooligosaccharide--protein glycosyltransferase subunit 2         | 0.33 |
| 1128 | PACS1   | Phosphofurin acidic cluster sorting protein 1                                    | 0.33 |
| 1129 | TIMM8B  | Mitochondrial import inner membrane translocase subunit Tim8 B                   | 0.32 |
| 1130 | NAGK    | N-acetyl-D-glucosamine kinase                                                    | 0.32 |
| 1131 | RANGRF  | Ran guanine nucleotide release factor                                            | 0.32 |
| 1132 | SUCLG2  | Succinate--CoA ligase [GDP-forming] subunit beta, mitochondrial                  | 0.31 |
| 1133 | HELLS   | Helicase, lymphoid-specific, isoform CRA_d                                       | 0.31 |
| 1134 | MEA1    | Male-enhanced antigen 1                                                          | 0.31 |
| 1135 | SNAP23  | Synaptosomal-associated protein                                                  | 0.30 |
| 1136 | ATP5J   | ATP synthase-coupling factor 6, mitochondrial                                    | 0.30 |
| 1137 | TAB1    | TGF-beta-activated kinase 1 and MAP3K7-binding protein 1                         | 0.29 |
| 1138 | OGT     | UDP-N-acetylglucosamine--peptide N-acetylglucosaminyltransferase 110 kDa subunit | 0.29 |
| 1139 | RAD23A  | UV excision repair protein RAD23 homolog A                                       | 0.29 |
| 1140 | C2      | Complement C2                                                                    | 0.28 |
| 1141 | MAPK7   | Mitogen-activated protein kinase 7                                               | 0.28 |
| 1142 | GYG1    | Glycogenin 1, isoform CRA_e                                                      | 0.28 |
| 1143 | CENPC   | Centromere protein C                                                             | 0.28 |
| 1144 | MKLN1   | Muskelin                                                                         | 0.28 |
| 1145 | NCAPG2  | Condensin-2 complex subunit G2                                                   | 0.27 |
| 1146 | LIG3    | DNA ligase 3                                                                     | 0.27 |
| 1147 | SNX17   | Sorting nexin-17                                                                 | 0.27 |
| 1148 | PPP6R3  | Serine/threonine-protein phosphatase 6 regulatory subunit 3                      | 0.27 |
| 1149 | PPIC    | Peptidyl-prolyl cis-trans isomerase C                                            | 0.25 |

|      |            |                                                                       |      |
|------|------------|-----------------------------------------------------------------------|------|
| 1150 | HEXB       | Beta-hexosaminidase subunit beta                                      | 0.25 |
| 1151 | GADD45GIP1 | Growth arrest and DNA damage-inducible proteins-interacting protein 1 | 0.25 |
| 1152 | VSTM2A     | V-set and transmembrane domain-containing protein 2A                  | 0.25 |
| 1153 | BIRC5      | Baculoviral IAP repeat-containing protein 5                           | 0.24 |
| 1154 | RPS19      | 40S ribosomal protein S19                                             | 0.24 |
| 1155 | MRPS21     | 28S ribosomal protein S21, mitochondrial                              | 0.24 |
| 1156 | TRIM21     | E3 ubiquitin-protein ligase TRIM21                                    | 0.24 |
| 1157 | ASCC2      | Activating signal cointegrator 1 complex subunit 2                    | 0.23 |
| 1158 | AHCYL1     | Adenosylhomocysteinase 2                                              | 0.22 |
| 1159 | STK4       | Serine/threonine-protein kinase 4                                     | 0.22 |
| 1160 | TOM1       | Target of Myb protein 1                                               | 0.22 |
| 1161 | LUZP1      | Leucine zipper protein 1                                              | 0.22 |
| 1162 | FAM208A    | Protein TASOR                                                         | 0.22 |
| 1163 | MORF4L2    | Mortality factor 4-like protein 2                                     | 0.21 |
| 1164 | TRMT5      | tRNA (guanine(37)-N1)-methyltransferase                               | 0.21 |
| 1165 | KIAA0556   | Protein KIAA0556                                                      | 0.21 |
| 1166 | BUD31      | Protein BUD31 homolog                                                 | 0.21 |
| 1167 | HEXB       | Beta-hexosaminidase subunit beta                                      | 0.19 |
| 1168 | RPL29      | 60S ribosomal protein L29                                             | 0.19 |
| 1169 | CROCC      | Rootletin                                                             | 0.18 |
| 1170 | LIPE       | Hormone-sensitive lipase                                              | 0.17 |
| 1171 | SAV1       | Protein salvador homolog 1                                            | 0.16 |
| 1172 | MRPL27     | 39S ribosomal protein L27, mitochondrial                              | 0.16 |
| 1173 | FAM162A    | Protein FAM162A                                                       | 0.15 |
| 1174 | SNW1       | SNW domain-containing protein 1                                       | 0.15 |
| 1175 | TAF3       | Transcription initiation factor TFIID subunit 3                       | 0.13 |
| 1176 | TAF1L      | Transcription initiation factor TFIID subunit 1-like                  | 0.12 |
| 1177 | IRGQ       | Immunity-related GTPase family Q protein                              | 0.11 |
| 1178 | PDDC1      | Parkinson disease 7 domain-containing protein 1                       | 0.10 |
| 1179 | FBXW8      | F-box/WD repeat-containing protein 8                                  | 0.10 |
| 1180 | NRBP1      | Nuclear receptor-binding protein                                      | 0.10 |
| 1181 | CHRD1      | Chordin-like protein 1                                                | 0.09 |
| 1182 | GLTSCR2    | Glioma tumor suppressor candidate region gene 2 protein               | 0.07 |
| 1183 | ANXA1      | Annexin A1                                                            | 0.06 |
| 1184 | OR4A15     | Olfactory receptor 4A15                                               | 0.05 |
| 1185 | IFT81      | Intraflagellar transport protein 81 homolog                           | 0.03 |

---

**Studies of glyoxalase 1-linked multidrug resistance reveal glycolysis-derived reactive metabolite, methylglyoxal, is a common contributor in cancer chemotherapy targeting the spliceosome.**

Muhanad Alhujaily et al.

**Table S3. Proteins of the cytoplasmic extract containing MG-H1 residues and increased by HEK293 cells treatment with methylglyoxal**

| No | Gene     | Name of protein                                                           | Fold change |
|----|----------|---------------------------------------------------------------------------|-------------|
| 1  | MEGF11   | Multiple epidermal growth factor-like domains protein 11                  | 14.0        |
| 2  | TSTA3    | GDP-L-fucose synthase                                                     | 5.7         |
| 3  | NLRP2    | NACHT, LRR and PYD domains-containing protein 2                           | 4.1         |
| 4  | TRIM52   | Tripartite motif-containing protein 52                                    | 3.6         |
| 5  | CHMP2A   | Charged multivesicular body protein 2a                                    | 3.5         |
| 6  | GPR119   | Glucose-dependent insulinotropic receptor                                 | 3.4         |
| 7  | KRT9     | Keratin, type I cytoskeletal 9                                            | 3.3         |
| 8  | ABHD12B  | Alpha/Beta Hydrolase Domain-Containing Protein 12B                        | 3.2         |
| 9  | CACNA1H  | Voltage-dependent T-type calcium channel subunit alpha-1H                 | 3.2         |
| 10 | SV2B     | Synaptic vesicle glycoprotein 2B                                          | 3.2         |
| 11 | THRA     | Thyroid hormone receptor alpha                                            | 2.7         |
| 12 | KIAA0355 | Uncharacterized protein KIAA0355                                          | 2.6         |
| 13 | FAAP20   | Fanconi anemia core complex-associated protein 20                         | 2.6         |
| 14 | REXO2    | Oligoribonuclease, mitochondrial                                          | 2.4         |
| 15 | CIITA    | MHC class II transactivator                                               | 2.4         |
| 16 | MZT2A    | Mitotic-spindle organizing protein 2A                                     | 2.3         |
| 17 | PTPRN2   | Receptor-type tyrosine-protein phosphatase N2                             | 2.1         |
| 18 | SLC25A37 | Mitoferrin-1                                                              | 2.1         |
| 19 | TUBGCP6  | Gamma-tubulin complex component 6                                         | 2.0         |
| 20 | CLN5     | Ceroid-lipofuscinosis neuronal protein 5                                  | 2.0         |
| 21 | MACF1    | Microtubule-actin cross-linking factor 1, isoforms 1/2/3/5                | 2.0         |
| 22 | COL27A1  | Collagen alpha-1(XXVII) chain                                             | 2.0         |
| 23 | PLCB1    | Phosphoinositide phospholipase C                                          | 1.9         |
| 24 | C19orf68 | Uncharacterized protein C19orf68                                          | 1.9         |
| 25 | SEMA4B   | Semaphorin-4B                                                             | 1.8         |
| 26 | CABIN1   | Calcineurin-binding protein cabin-1                                       | 1.8         |
| 27 | SLC6A9   | Fanconi Anemia Core Complex Associated Protein 20                         | 1.7         |
| 28 | MYEF2    | Myelin expression factor 2                                                | 1.7         |
| 29 | MUC20    | Mucin-20                                                                  | 1.6         |
| 30 | SAMD11   | Sterile alpha motif domain-containing protein 11                          | 1.6         |
| 31 | CEP250   | Centrosome-associated protein CEP250                                      | 1.6         |
| 32 | WDR33    | pre-mRNA 3' end processing protein WDR33                                  | 1.6         |
| 33 | PPP4R1L  | Putative serine/threonine-protein phosphatase 4 regulatory subunit 1-like | 1.5         |
| 34 | SNTG2    | Gamma-2-syntrophin                                                        | 1.5         |
| 35 | DAP3     | 28S ribosomal protein S29, mitochondrial                                  | 1.5         |
| 36 | WNK3     | Serine/threonine-protein kinase WNK3                                      | 1.4         |
| 37 | EDC3     | Enhancer of mRNA-decapping protein 3                                      | 1.4         |
| 38 | FAM27E3  | Family With Sequence Similarity 27 Member E3                              | 1.3         |
| 39 | SMG6     | Telomerase-binding protein EST1A                                          | 1.3         |
| 40 | POM121C  | Nuclear envelope pore membrane protein POM 121C                           | 1.2         |
| 41 | NASP     | Nuclear autoantigenic sperm protein                                       | 1.2         |

**Studies of glyoxalase 1-linked multidrug resistance reveal glycolysis-derived reactive metabolite, methylglyoxal, is a common contributor in cancer chemotherapy targeting the spliceosome.**

Muhanad Alhujaily et al.

**Table S4. Proteins of the cytoplasmic extract containing MG-H1 residues and decreased by HEK293 cells treatment with methylglyoxal**

| No | Gene         | Name of protein                                                | Fold change |
|----|--------------|----------------------------------------------------------------|-------------|
| 1  | HNRNPK       | Heterogeneous nuclear ribonucleoprotein K                      | 0.91        |
| 2  | FUS          | RNA-binding protein FUS                                        | 0.86        |
| 3  | ZCCHC2       | Zinc finger CCHC domain-containing protein 2                   | 0.84        |
| 4  | DHX15        | Pre-mRNA-splicing factor ATP-dependent RNA helicase            | 0.82        |
| 5  | TRIM46       | Tripartite motif-containing protein 46                         | 0.81        |
| 6  | CSNK2A2      | Casein kinase II subunit alpha'                                | 0.81        |
| 7  | HNRNPM       | Heterogeneous nuclear ribonucleoprotein M                      | 0.81        |
| 8  | EWSR1        | RNA-binding protein EWS                                        | 0.81        |
| 9  | KRI1         | Protein KRI1 homolog                                           | 0.79        |
| 10 | LDHA         | L-lactate dehydrogenase A chain                                | 0.79        |
| 11 | ESPNL        | Espin-like protein                                             | 0.78        |
| 12 | MSH6         | DNA mismatch repair protein Msh6                               | 0.78        |
| 13 | ILF2         | Interleukin enhancer-binding factor 2                          | 0.76        |
| 14 | PRDX1        | Peroxiredoxin-1                                                | 0.76        |
| 15 | MAK16        | Protein MAK16 homolog OS                                       | 0.76        |
| 16 | HNRNPU       | Heterogeneous nuclear ribonucleoprotein U                      | 0.75        |
| 17 | RECQL5       | ATP-dependent DNA helicase                                     | 0.75        |
| 18 | EEF2         | Elongation factor 2                                            | 0.73        |
| 19 | HIST1H2BN    | Histone H2B                                                    | 0.73        |
| 20 | BAZ1B        | Tyrosine-protein kinase BAZ1B                                  | 0.71        |
| 21 | ATXN10       | Ataxin-10                                                      | 0.71        |
| 22 | PHLPP1       | PH domain leucine-rich repeat-containing protein phosphatase 1 | 0.70        |
| 23 | SUPT6H       | Transcription elongation factor SPT6                           | 0.68        |
| 24 | KCTD9        | BTB/POZ domain-containing protein KCTD9                        | 0.67        |
| 25 | CPXM2        | Inactive carboxypeptidase-like protein X2                      | 0.67        |
| 26 | USP5         | Ubiquitin carboxyl-terminal hydrolase 5                        | 0.66        |
| 27 | ZFR          | Zinc finger RNA-binding protein                                | 0.66        |
| 28 | NPIPA2       | Nuclear pore complex-interacting protein family member A2      | 0.64        |
| 29 | MYO15A       | Unconventional myosin-XV                                       | 0.62        |
| 30 | AGBL4        | Cytosolic carboxypeptidase 6                                   | 0.62        |
| 31 | HAGH         | Hydroxyacylglutathione hydrolase, mitochondrial                | 0.62        |
| 32 | ZNF513       | Zinc finger protein 513                                        | 0.62        |
| 33 | ZNF345       | Zinc finger protein 345                                        | 0.61        |
| 34 | SRP54        | Signal recognition particle 54 kDa protein                     | 0.61        |
| 35 | UBA52        | Ubiquitin-60S ribosomal protein L40                            | 0.61        |
| 36 | MYD88        | Myeloid differentiation primary response protein MyD88         | 0.61        |
| 37 | LOC105372343 | Uncharacterized protein                                        | 0.61        |
| 38 | RPUSD3       | RNA pseudouridylate synthase domain-containing protein 3       | 0.60        |
| 39 | DOCK2        | Dedicator of cytokinesis protein 2                             | 0.60        |
| 40 | TRIT1        | tRNA dimethylallyltransferase, mitochondrial                   | 0.58        |
| 41 | SPEN         | Msx2-interacting protein                                       | 0.56        |
| 42 | DSP          | Desmoplakin                                                    | 0.55        |
| 43 | ANKRD1       | Ankyrin repeat domain-containing protein 1                     | 0.54        |
| 44 | POLR1A       | DNA-directed RNA polymerase subunit                            | 0.53        |
| 45 | MYO18A       | Unconventional myosin-XVIIIa                                   | 0.53        |

|    |          |                                                      |      |
|----|----------|------------------------------------------------------|------|
| 46 | AKAP6    | A-kinase anchor protein 6                            | 0.52 |
| 47 | PARD3B   | Partitioning defective 3 homolog B                   | 0.51 |
| 48 | IFT172   | Intraflagellar transport protein 172 homolog         | 0.51 |
| 49 | TOP2B    | DNA topoisomerase 2                                  | 0.50 |
| 50 | KLHL33   | Kelch-like protein 33                                | 0.50 |
| 51 | ANKS3    | Ankyrin repeat and SAM domain-containing protein 3   | 0.49 |
| 52 | ACKR2    | Atypical chemokine receptor 2                        | 0.47 |
| 53 | CPE      | Carboxypeptidase E                                   | 0.46 |
| 54 | GPD2     | Glycerol-3-phosphate dehydrogenase, mitochondrial    | 0.46 |
| 55 | CHD3     | Chromodomain-helicase-DNA-binding protein 3          | 0.42 |
| 56 | SLC39A11 | Zinc transporter ZIP11                               | 0.39 |
| 57 | TEX33    | Testis-expressed protein 33                          | 0.39 |
| 58 | MBIP     | MAP3K12-binding inhibitory protein 1                 | 0.38 |
| 59 | PRX      | Periaxin                                             | 0.38 |
| 60 | MAP7     | Ensconsin                                            | 0.35 |
| 61 | VSTM2A   | V-set and transmembrane domain-containing protein 2A | 0.25 |
| 62 | MRPS21   | 28S ribosomal protein S21, mitochondrial             | 0.24 |
| 63 | TRIM21   | E3 ubiquitin-protein ligase TRIM21                   | 0.24 |
| 64 | KIAA0556 | Protein KIAA0556                                     | 0.21 |
| 65 | CROCC    | Rootletin                                            | 0.18 |
| 66 | LIPE     | Hormone-sensitive lipase                             | 0.17 |
| 67 | TAF3     | Transcription initiation factor TFIID subunit 3      | 0.13 |
| 68 | FBXW8    | F-box/WD repeat-containing protein 8                 | 0.10 |
| 69 | OR4A15   | Olfactory receptor 4A15                              | 0.05 |

---

**Studies of glyoxalase 1-linked multidrug resistance reveal glycolysis-derived reactive metabolite, methylglyoxal, is a common contributor in cancer chemotherapy targeting the spliceosome.**

Muhanad Alhujaily et al.

**Table S5. Proteins in the nuclear extract increased in abundance by treatment with methylglyoxal.**

| No | Gene     | Name of protein                                                   | Fold change |
|----|----------|-------------------------------------------------------------------|-------------|
| 1  | MLXIPL   | Carbohydrate-responsive element-binding protein                   | 262.6       |
| 2  | ATXN7L1  | Ataxin-7-like protein 1                                           | 216.1       |
| 3  | PPBP     | Platelet basic protein                                            | 48.3        |
| 4  | IGHG2    | Immunoglobulin heavy constant gamma 2                             | 23.8        |
| 5  | TAC1     | Protachykinin-1                                                   | 20.6        |
| 6  | L1TD1    | LINE-1 type transposase domain-containing protein 1               | 19.5        |
| 7  | RBM10    | RNA binding motif protein 10, isoform CRA_d                       | 19.1        |
| 8  | KNG1     | Kininogen-1                                                       | 17.3        |
| 9  | ACAA2    | 3-ketoacyl-CoA thiolase, mitochondrial                            | 14.7        |
| 10 | IGHA2    | Ig alpha-2 chain C region                                         | 14.5        |
| 11 | HPX      | HPX protein                                                       | 13.9        |
| 12 | HRG      | Histidine-rich glycoprotein                                       | 11.3        |
| 13 | PF4      | Platelet factor 4                                                 | 10.9        |
| 14 | APOA1    | Apolipoprotein A-I                                                | 9.6         |
| 15 | IGHG1    | Ig gamma-1 chain C region                                         | 9.2         |
| 16 | TF       | Transferrin                                                       | 8.5         |
| 17 | IGHG3    | Immunoglobulin heavy constant gamma 3                             | 7.8         |
| 18 | DPH1     | Diphthamide biosynthesis protein 1                                | 6.7         |
| 19 | A2M      | Alpha-2-macroglobulin                                             | 6.3         |
| 20 | PRRC1    | Protein PRRC1 (Proline-rich and coiled-coil-containing protein 1) | 6.2         |
| 21 | ALB      | Albumin                                                           | 6.2         |
| 22 | EIF4EBP1 | Eukaryotic translation initiation factor 4E-binding protein 1     | 5.4         |
| 23 | MRPL28   | 39S ribosomal protein L28, mitochondrial                          | 4.7         |
| 24 | NCF2     | Neutrophil cytosol factor 2                                       | 4.0         |
| 25 | AHSA1    | Activator of 90 kDa heat shock protein ATPase homolog 1           | 3.0         |
| 26 | WDR66    | WD repeat-containing protein 66                                   | 2.9         |
| 27 | CNPY3    | Protein canopy homolog 3                                          | 2.8         |
| 28 | CHTOP    | Chromatin target of PRMT1 protein                                 | 2.7         |
| 29 | SUCLG2   | Succinate--CoA ligase [GDP-forming] subunit beta, mitochondrial   | 2.3         |
| 30 | RWDD1    | RWD domain-containing protein 1                                   | 2.2         |
| 31 | SCAMP3   | Secretory carrier-associated membrane protein 3                   | 2.2         |
| 32 | CCDC158  | Coiled-coil domain-containing protein 158                         | 2.1         |
| 33 | ECHS1    | Enoyl-CoA hydratase, mitochondrial                                | 2.0         |
| 34 | SLC9A3R1 | Na(+)/H(+) exchange regulatory cofactor NHE-RF1                   | 1.9         |
| 35 | POTEE    | POTE ankyrin domain family member E                               | 1.8         |
| 36 | NENF     | Neudesin                                                          | 1.6         |
| 37 | PDIA3    | Protein disulfide-isomerase A3                                    | 1.6         |
| 38 | ACTB     | Actin, cytoplasmic 1                                              | 1.6         |
| 39 | ACTBL2   | Beta-actin-like protein 2                                         | 1.6         |
| 40 | IDE      | Insulin-degrading enzyme                                          | 1.5         |
| 41 | CAPZA1   | F-actin-capping protein subunit alpha-1                           | 1.5         |
| 42 | ACTC1    | Actin, alpha cardiac muscle 1                                     | 1.5         |
| 43 | PTPN1    | Tyrosine-protein phosphatase non-receptor type                    | 1.5         |
| 44 | HSPA8    | Heat shock cognate 71 kDa protein                                 | 1.4         |
| 45 | PSAP     | Prosaposin                                                        | 1.3         |

|    |       |                                       |     |
|----|-------|---------------------------------------|-----|
| 46 | MMP25 | Matrix metalloproteinase-25           | 1.3 |
| 47 | COX17 | Cytochrome c oxidase copper chaperone | 1.2 |
| 48 | GAA   | Lysosomal alpha-glucosidase           | 1.2 |

---

**Studies of glyoxalase 1-linked multidrug resistance reveal glycolysis-derived reactive metabolite, methylglyoxal, is a common contributor in cancer chemotherapy targeting the spliceosome.**

Muhanad Alhujaily et al.

**Table S6. Proteins in the nuclear extract decreased in abundance by treatment with methylglyoxal.**

| No | Gene      | Name of protein                                                   | Fold change |
|----|-----------|-------------------------------------------------------------------|-------------|
| 1  | XRCC5     | X-ray repair cross-complementing protein 5                        | 0.78        |
| 2  | PYCR2     | Pyrroline-5-carboxylate reductase                                 | 0.77        |
| 3  | MAGOHB    | Protein mago nashi homolog 2                                      | 0.72        |
| 4  | CPSF1     | Cleavage and polyadenylation specificity factor subunit 1         | 0.71        |
| 5  | HNRNPUL1  | Heterogeneous nuclear ribonucleoprotein U-like protein 1          | 0.67        |
| 6  | CIRBP     | Cold-inducible RNA-binding protein                                | 0.67        |
| 7  | 4SV       | Uncharacterized protein                                           | 0.67        |
| 8  | SNRPA1    | U2 small nuclear ribonucleoprotein A'                             | 0.66        |
| 9  | RPS5      | 40S ribosomal protein S5                                          | 0.64        |
| 10 | PCBP2     | Poly(rC)-binding protein 2                                        | 0.63        |
| 11 | FAM136A   | Family With Sequence Similarity 136 Member A                      | 0.61        |
| 12 | RPL36A    | 60S ribosomal protein L36a                                        | 0.60        |
| 13 | ZFR       | Zinc finger RNA-binding protein                                   | 0.60        |
| 14 | PHC2      | Polyhomeotic-like protein 2                                       | 0.59        |
| 15 | NIP7      | 60S ribosome subunit biogenesis protein NIP7 homolog              | 0.58        |
| 16 | TEX15     | Testis-expressed protein 15                                       | 0.57        |
| 17 | FAM50A    | Protein FAM50A                                                    | 0.56        |
| 18 | GLO1      | Glyoxalase 1                                                      | 0.56        |
| 19 | SNRPD1    | Small nuclear ribonucleoprotein Sm D1                             | 0.56        |
| 20 | PTBP1     | Polypyrimidine tract-binding protein 1                            | 0.55        |
| 21 | PYCR1     | Pyrroline-5-carboxylate reductase 1, mitochondrial                | 0.50        |
| 22 | PRMT1     | Protein arginine N-methyltransferase 1                            | 0.50        |
| 23 | ODF3L2    | Outer dense fiber protein 3-like protein 2                        | 0.50        |
| 24 | ARHGAP4   | Rho GTPase-activating protein 4                                   | 0.49        |
| 25 | RPL28     | 60S ribosomal protein L28 OS                                      | 0.49        |
| 26 | MAZ       | Myc-associated zinc finger protein                                | 0.47        |
| 27 | SUB1      | Activated RNA polymerase II transcriptional coactivator p15       | 0.47        |
| 28 | FSHR      | Follicle-stimulating hormone receptor                             | 0.47        |
| 29 | PUS1      | tRNA pseudouridine synthase                                       | 0.46        |
| 30 | DKC1      | H/ACA ribonucleoprotein complex subunit 4                         | 0.44        |
| 31 | NAT10     | RNA cytidine acetyltransferase                                    | 0.43        |
| 32 | CHD8      | Chromodomain-helicase-DNA-binding protein 8                       | 0.43        |
| 33 | SF3B4     | Splicing factor 3B subunit 4                                      | 0.42        |
| 34 | HADH      | Hydroxyacyl-coenzyme A dehydrogenase, mitochondrial               | 0.42        |
| 35 | STK38L    | Serine/threonine-protein kinase 38-like                           | 0.42        |
| 36 | MAP4      | Microtubule-associated protein                                    | 0.41        |
| 37 | BCKDHB    | 2-oxoisovalerate dehydrogenase subunit beta, mitochondrial        | 0.40        |
| 38 | CETN2     | Centrin-2                                                         | 0.39        |
| 39 | PRRC2B    | Protein PRRC2B (Proline-rich coiled-coil protein 2B)              | 0.38        |
| 40 | NIF3L1BP1 | Ngg1 interacting factor 3 like 1 binding protein 1, isoform CRA_b | 0.37        |
| 41 | CBR4      | Carbonyl reductase family member 4                                | 0.36        |
| 42 | C19orf53  | Leydig cell tumor 10 kDa protein homolog                          | 0.36        |
| 43 | LYST      | Lysosomal-trafficking regulator                                   | 0.34        |
| 44 | LMNTD2    | Lamin tail domain-containing protein 2                            | 0.31        |
| 45 | TERF2IP   | Telomeric repeat-binding factor 2-interacting protein 1           | 0.30        |



|    |          |                                                                  |      |
|----|----------|------------------------------------------------------------------|------|
| 46 | ATPIF1   | ATPase inhibitor, mitochondrial                                  | 0.29 |
| 47 | RPS27L   | 40S ribosomal protein S27                                        | 0.26 |
| 48 | HMGGA2   | High mobility group protein HMGI-C                               | 0.20 |
| 49 | THOC5    | THO complex subunit 5 homolog                                    | 0.20 |
| 50 | ITPRIPL2 | Inositol 1,4,5-trisphosphate receptor-interacting protein-like 2 | 0.19 |
| 51 | LSM7     | U6 snRNA-associated Sm-like protein LSm7                         | 0.18 |
| 52 | AASS     | Alpha-aminoadipic semialdehyde synthase, mitochondrial           | 0.17 |
| 53 | GTF2E2   | Transcription initiation factor IIE subunit beta                 | 0.17 |
| 54 | GYS1     | Glycogen [starch] synthase, muscle                               | 0.16 |
| 55 | GCDH     | Glutaryl-CoA dehydrogenase, mitochondrial                        | 0.13 |
| 56 | ABHD14A  | Alpha/beta hydrolase domain-containing protein 14A               | 0.09 |
| 57 | PSMD7    | 26S proteasome non-ATPase regulatory subunit 7                   | 0.08 |
| 58 | RBM3     | RNA-binding protein 3                                            | 0.02 |

---

**Studies of glyoxalase 1-linked multidrug resistance reveal glycolysis-derived reactive metabolite, methylglyoxal, is a common contributor in cancer chemotherapy targeting the spliceosome.**

Muhanad Alhujaily et al.

**Table S7. Proteins in the mitochondrial matrix and intermembrane space extract increased in abundance by treatment with methylglyoxal.**

| No | Gene     | Name of protein                               | Fold change |
|----|----------|-----------------------------------------------|-------------|
| 1  | CRYAB    | crystallin alpha B                            | 49.3        |
| 2  | TERF2    | telomeric repeat binding factor 2             | 27.3        |
| 3  | ALDH3A1  | aldehyde dehydrogenase 3 family member A1     | 20.6        |
| 4  | KRT5     | keratin 5                                     | 18.4        |
| 5  | SLC26A10 | solute carrier family 26 member 10            | 10.7        |
| 6  | SAFB2    | scaffold attachment factor B2                 | 8           |
| 7  | MTSS1    | MTSS1, I-BAR domain containing                | 6.8         |
| 8  | IRAK4    | interleukin 1 receptor associated kinase 4    | 6.6         |
| 9  | CALML5   | calmodulin like 5                             | 4.1         |
| 10 | CASP14   | caspase 14                                    | 3           |
| 11 | MYL6     | myosin light chain 6                          | 2           |
| 12 | RPL21    | ribosomal protein L21                         | 1.9         |
| 13 | RPL3     | ribosomal protein L3                          | 1.7         |
| 14 | RNPS1    | RNA binding protein with serine rich domain 1 | 1.7         |
| 15 | RPL3     | ribosomal protein L3                          | 1.6         |
| 16 | SOD1     | superoxide dismutase 1, soluble               | 1.4         |

**Studies of glyoxalase 1-linked multidrug resistance reveal glycolysis-derived reactive metabolite, methylglyoxal, is a common contributor in cancer chemotherapy targeting the spliceosome.**

Muhanad Alhujaily et al.

**Table S8. Proteins in the mitochondrial matrix and intermembrane space extract decreased in abundance by treatment with methylglyoxal.**

| No | Gene      | Name of protein                                                           | Fold change |
|----|-----------|---------------------------------------------------------------------------|-------------|
| 1  | NAP1L4    | Nucleosome assembly protein 1-like 4 OS                                   | 0.79        |
| 2  | PTPN11    | Tyrosine-protein phosphatase non-receptor type 11 OS                      | 0.75        |
| 3  | METAP2    | Methionine aminopeptidase 2 OS                                            | 0.74        |
| 4  | RANBP1    | Ran-specific GTPase-activating protein OS                                 | 0.74        |
| 5  | NUMA1     | Nuclear mitotic apparatus protein 1 OS                                    | 0.73        |
| 6  | NAP1L1    | Nucleosome assembly protein 1-like 1 (Fragment) OS                        | 0.72        |
| 7  | ANP32B    | Acidic leucine-rich nuclear phosphoprotein 32 family member B OS          | 0.71        |
| 8  | NAP1L1    | Nucleosome assembly protein 1-like 1 OS                                   | 0.71        |
| 9  | WDR12     | Ribosome biogenesis protein WDR12 OS                                      | 0.71        |
| 10 | MAD2L1    | Mitotic spindle assembly checkpoint protein MAD2A OS                      | 0.70        |
| 11 | UCHL3     | Ubiquitin carboxyl-terminal hydrolase OS                                  | 0.69        |
| 12 | GIGYF2    | PERQ amino acid-rich with GYF domain-containing protein 2 OS              | 0.68        |
| 13 | NAPA      | Alpha-soluble NSF attachment protein OS                                   | 0.67        |
| 14 | EIF5A     | Eukaryotic translation initiation factor 5A (Fragment) OS                 | 0.67        |
| 15 | CCT8      | T-complex protein 1 subunit theta OS                                      | 0.67        |
| 16 | RNASEH2A  | Ribonuclease H2 subunit A OS                                              | 0.67        |
| 17 | API5      | Apoptosis inhibitor 5 OS                                                  | 0.66        |
| 18 | NAE1      | NEDD8-activating enzyme E1 regulatory subunit OS                          | 0.66        |
| 19 | NELFE     | Negative elongation factor E OS                                           | 0.65        |
| 20 | TRMT6     | tRNA (adenine(58)-N(1))-methyltransferase non-catalytic subunit TRM6 OS   | 0.65        |
| 21 | PLS3      | Plastin-3 OS                                                              | 0.65        |
| 22 | PAFAH1B3  | Platelet-activating factor acetylhydrolase IB subunit gamma (Fragment) OS | 0.62        |
| 23 | NMD3      | 60S ribosomal export protein NMD3 OS                                      | 0.62        |
| 24 | OSBP      | Oxysterol-binding protein 1 OS                                            | 0.61        |
| 25 | ACP1      | Low molecular weight phosphotyrosine protein phosphatase OS               | 0.61        |
| 26 | ARHGDI1   | Rho GDP-dissociation inhibitor 1 (Fragment) OS                            | 0.60        |
| 27 | UBTF      | Nucleolar transcription factor 1 OS                                       | 0.60        |
| 28 | EIF2B2    | Translation initiation factor eIF-2B subunit beta OS                      | 0.59        |
| 29 | SRPK2     | SRSF protein kinase 2 OS                                                  | 0.59        |
| 30 | KHSRP     | Far upstream element-binding protein 2 OS                                 | 0.59        |
| 31 | JMJD6     | Bifunctional arginine demethylase and lysyl-hydroxylase JMJD6 OS          | 0.59        |
| 32 | APOA1     | Apolipoprotein A-I OS                                                     | 0.59        |
| 33 | SMARCC1   | SWI/SNF complex subunit SMARCC1 OS                                        | 0.58        |
| 34 | C14orf166 | UPF0568 protein C14orf166 OS                                              | 0.58        |
| 35 | ECM29     | Proteasome-associated protein ECM29 homolog OS                            | 0.57        |
| 36 | GSTM3     | Glutathione S-transferase OS                                              | 0.57        |
| 37 | TROVE2    | 60 kDa SS-A/Ro ribonucleoprotein (Fragment) OS                            | 0.57        |
| 38 | CLUH      | Clustered mitochondria protein homolog (Fragment) OS                      | 0.56        |
| 39 | KLC1      | Kinesin light chain 1 OS                                                  | 0.56        |
| 40 | CCDC124   | Coiled-coil domain-containing protein 124 OS                              | 0.55        |
| 41 | CCDC43    | CCDC43 protein OS                                                         | 0.55        |
| 42 | VIM       | Vimentin OS                                                               | 0.55        |
| 43 | TCERG1    | Transcription elongation regulator 1 OS                                   | 0.54        |
| 44 | VTA1      | Chromosome 6 open reading frame 55, isoform CRA_b OS                      | 0.54        |
| 45 | APIP      | Methylthioribulose-1-phosphate dehydratase OS                             | 0.54        |

|    |          |                                                                 |      |
|----|----------|-----------------------------------------------------------------|------|
| 46 | ZC3H15   | Zinc finger CCCH domain-containing protein 15 OS                | 0.54 |
| 47 | DNAJC2   | DnaJ homolog subfamily C member 2 OS                            | 0.54 |
| 48 | STAT1    | Signal transducer and activator of transcription OS             | 0.54 |
| 49 | PRPF31   | U4/U6 small nuclear ribonucleoprotein Prp31 OS                  | 0.54 |
| 50 | CLUH     | Clustered mitochondria protein homolog OS                       | 0.54 |
| 51 | ARMT1    | Protein-glutamate O-methyltransferase OS                        | 0.53 |
| 52 | CNDP2    | Cytosolic non-specific dipeptidase OS                           | 0.53 |
| 53 | EDC4     | Enhancer of mRNA-decapping protein 4 OS                         | 0.52 |
| 54 | SURF2    | Surfeit locus protein 2 OS                                      | 0.52 |
| 55 | SNX5     | Sorting nexin-5 OS                                              | 0.51 |
| 56 | IFT88    | Intraflagellar transport protein 88 homolog (Fragment) OS       | 0.51 |
| 57 | TFG      | Protein TFG (Fragment) OS                                       | 0.51 |
| 58 | GLOD4    | Glyoxalase domain-containing protein 4 OS                       | 0.50 |
| 59 | ATXN7L3B | Putative ataxin-7-like protein 3B OS                            | 0.49 |
| 60 | EAPP     | E2F-associated phosphoprotein OS                                | 0.48 |
| 61 | PKN2     | Serine/threonine-protein kinase N2 OS                           | 0.48 |
| 62 | CTTN     | Src substrate cortactin OS                                      | 0.47 |
| 63 | GTPBP1   | GTP-binding protein 1 OS                                        | 0.47 |
| 64 | PPIA     | Peptidyl-prolyl cis-trans isomerase A                           | 0.47 |
| 65 | CBSL     | Cystathionine beta-synthase-like protein OS                     | 0.46 |
| 66 | RABGGTB  | Geranylgeranyl transferase type-2 subunit beta OS               | 0.46 |
| 67 | UBE2G1   | Ubiquitin-conjugating enzyme E2 G1 OS                           | 0.46 |
| 68 | TST      | Thiosulfate sulfurtransferase OS                                | 0.45 |
| 69 | ADI1     | 1,2-dihydroxy-3-keto-5-methylthiopentene dioxygenase OS         | 0.45 |
| 70 | NUP133   | Nuclear pore complex protein Nup133 OS                          | 0.44 |
| 71 | HSD17B4  | Peroxisomal multifunctional enzyme type 2 OS                    | 0.44 |
| 72 | DDX55    | RNA helicase OS                                                 | 0.44 |
| 73 | HSPB11   | Chromosome 1 open reading frame 41, isoform CRA_b OS            | 0.43 |
| 74 | GINS1    | DNA replication complex GINS protein PSF1 OS                    | 0.43 |
| 75 | RIOK1    | Serine/threonine-protein kinase RIO1 OS                         | 0.42 |
| 76 | DSP      | Desmoplakin OS                                                  | 0.42 |
| 77 | PREP     | Prolyl endopeptidase OS                                         | 0.42 |
| 78 | ARL6IP4  | ADP-ribosylation factor-like protein 6-interacting protein 4 OS | 0.42 |
| 79 | CDC123   | Cell division cycle protein 123 homolog OS                      | 0.42 |
| 80 | GRB2     | Growth factor receptor-bound protein 2 OS                       | 0.41 |
| 81 | EIF1     | Eukaryotic translation initiation factor 1 OS                   | 0.41 |
| 82 | BLVRA    | Biliverdin reductase A OS                                       | 0.40 |
| 83 | NT5C     | 5'(3')-deoxyribonucleotidase, cytosolic type OS                 | 0.40 |
| 84 | RABL6    | Rab-like protein 6 OS                                           | 0.40 |
| 85 | CWC27    | Peptidyl-prolyl cis-trans isomerase CWC27 homolog OS            | 0.39 |
| 86 | HNRNPH3  | Heterogeneous nuclear ribonucleoprotein H3 OS                   | 0.39 |
| 87 | TXNRD1   | Thioredoxin reductase 1, cytoplasmic OS                         | 0.39 |
| 88 | AFM      | Afamin OS                                                       | 0.39 |
| 89 | PHF6     | PHD finger protein 6 OS                                         | 0.39 |
| 90 | NLN      | Neurolysin, mitochondrial OS                                    | 0.39 |
| 91 | PGM1     | Phosphoglucomutase-1 OS                                         | 0.38 |
| 92 | GTF3C5   | General transcription factor 3C polypeptide 5 OS                | 0.38 |
| 93 | POLR1C   | DNA-directed RNA polymerases I and III subunit RPAC1 OS         | 0.37 |
| 94 | ACTN2    | Alpha-actinin-2 OS                                              | 0.36 |
| 95 | STAU1    | Double-stranded RNA-binding protein Staufen homolog 1 OS        | 0.36 |
| 96 | POLR2G   | DNA-directed RNA polymerase II subunit RPB7 OS                  | 0.36 |

|     |         |                                                                  |      |
|-----|---------|------------------------------------------------------------------|------|
| 97  | VPS29   | Vacuolar protein sorting-associated protein 29 OS                | 0.36 |
| 98  | TLR3    | Toll-like receptor 3 OS                                          | 0.36 |
| 99  | EIF4H   | Eukaryotic translation initiation factor 4H OS                   | 0.34 |
| 100 | AHSA1   | Activator of 90 kDa heat shock protein ATPase homolog 1 OS       | 0.34 |
| 101 | SNX9    | Sorting nexin-9 OS                                               | 0.34 |
| 102 | PABPN1  | Polyadenylate-binding protein 2 (Fragment) OS                    | 0.34 |
| 103 | PPP1R7  | Protein phosphatase 1 regulatory subunit 7 OS                    | 0.33 |
| 104 | TFAM    | Transcription factor A, mitochondrial (Fragment) OS              | 0.32 |
| 105 | POLR2A  | DNA-directed RNA polymerase subunit OS                           | 0.32 |
| 106 | GNL3L   | Guanine nucleotide-binding protein-like 3-like protein OS        | 0.31 |
| 107 | PDXK    | Pyridoxal kinase OS                                              | 0.30 |
| 108 | PRRC2C  | Protein PRRC2C OS                                                | 0.30 |
| 109 | BOLA2   | BolA-like protein 2 OS                                           | 0.28 |
| 110 | WBSCR22 | Probable 18S rRNA (guanine-N(7))-methyltransferase (Fragment) OS | 0.27 |
| 111 | PRPF4   | U4/U6 small nuclear ribonucleoprotein Prp4 OS                    | 0.27 |
| 112 | CCDC40  | Coiled-coil domain-containing protein 40 OS                      | 0.26 |
| 113 | DUSP9   | Dual specificity protein phosphatase 9 OS                        | 0.25 |
| 114 | UTP18   | U3 small nucleolar RNA-associated protein 18 homolog OS          | 0.25 |
| 115 | CRK     | Adapter molecule crk OS                                          | 0.24 |
| 116 | NDUFB10 | NADH dehydrogenase [ubiquinone] 1 beta subcomplex subunit 10 OS  | 0.23 |
| 117 | FAM217A | Protein FAM217A OS                                               | 0.23 |
| 118 | FUBP1   | Far upstream element-binding protein 1 OS                        | 0.23 |
| 119 | ARL2    | ADP-ribosylation factor-like protein 2 OS                        | 0.22 |
| 120 | PFAS    | Phosphoribosylformylglycinamide synthase OS                      | 0.21 |
| 121 | DDX54   | ATP-dependent RNA helicase DDX54 OS                              | 0.17 |
| 122 | HEATR3  | HEAT repeat-containing protein 3 OS                              | 0.14 |
| 123 | MAT2B   | Methionine adenosyltransferase 2 subunit beta (Fragment) OS      | 0.14 |
| 124 | PFDN1   | Prefoldin subunit 1 OS                                           | 0.13 |
| 125 | VPS50   | Syndetin OS                                                      | 0.12 |
| 126 | CPNE8   | Copine-8 OS                                                      | 0.10 |
| 127 | TPP2    | Tripeptidyl-peptidase 2 OS                                       | 0.08 |
| 128 | P2RX4   | P2X purinoceptor 4 OS                                            | 0.06 |
| 129 | ISOC1   | Isochorismatase domain-containing protein 1 (Fragment) OS        | 0.06 |
| 130 | MRPL57  | Ribosomal protein 63, mitochondrial OS                           | 0.04 |
| 131 | DUS3L   | tRNA-dihydrouridine(47) synthase [NAD(P)(+)]-like OS             | 0.02 |
| 132 | BCL9L   | B-cell CLL/lymphoma 9-like protein OS                            | 0.02 |

---

**Studies of glyoxalase 1-linked multidrug resistance reveal glycolysis-derived reactive metabolite, methylglyoxal, is a common contributor in cancer chemotherapy targeting the spliceosome.**

Muhanad Alhujaily et al.

**Table S9. Proteins of the mitochondrial membrane of HEK 293 cells increased by treatment with methylglyoxal.**

| No | Gene   | Protein                                    | Fold change |
|----|--------|--------------------------------------------|-------------|
| 1  | RPS5   | Ribosomal protein S5                       | 9.6         |
| 2  | YLPM1  | YLP motif-containing protein 1             | 9.4         |
| 3  | CRTC3  | CREB-regulated transcription coactivator 3 | 5.0         |
| 4  | GRIN2D | Glutamate receptor ionotropic, NMDA 2D     | 4.4         |
| 5  | RPS23  | 40S ribosomal protein S23                  | 4.0         |
| 6  | STATH  | Statherin                                  | 3.2         |
| 7  | GRM6   | Metabotropic glutamate receptor 6          | 2.7         |
| 8  | PHB    | Prohibitin                                 | 2.5         |
| 9  | UFSP1  | Inactive Ufm1-specific protease 1          | 2.1         |

**Studies of glyoxalase 1-linked multidrug resistance reveal glycolysis-derived reactive metabolite, methylglyoxal, is a common contributor in cancer chemotherapy targeting the spliceosome.**

Muhanad Alhujaily et al.

**Table S10. Proteins of the mitochondrial membrane of HEK 293 cells decreased by treatment with methylglyoxal.**

| No | Gene        | Protein                                                                 | Fold change |
|----|-------------|-------------------------------------------------------------------------|-------------|
| 1  | HSPD1       | 60 kDa heat shock protein, mitochondrial                                | 0.69        |
| 2  | TOPAZ1      | Testis- and ovary-specific PAZ domain-containing protein 1              | 0.53        |
| 3  | PRB1        | Basic salivary proline-rich protein 1                                   | 0.51        |
| 4  | TUBB        | Tubulin beta chain                                                      | 0.47        |
| 5  | SLC25A6     | ADP/ATP translocase 3                                                   | 0.47        |
| 6  | IL4         | Interleukin 4 variant 2                                                 | 0.46        |
| 7  | RPS14       | 40S ribosomal protein S14                                               | 0.43        |
| 8  | ATP5B       | ATP synthase subunit beta, mitochondrial                                | 0.39        |
| 9  | APEH        | Acylamino-acid-releasing enzyme                                         | 0.38        |
| 10 | HSPA1B      | Heat shock 70 kDa protein 1B                                            | 0.38        |
| 11 | HIST1H1D    | Histone H1.3                                                            | 0.37        |
| 12 | ATP5D       | ATP synthase subunit delta, mitochondrial                               | 0.37        |
| 13 | RAVER2      | Ribonucleoprotein PTB-binding 2                                         | 0.35        |
| 14 | hCG_2039566 | Histone H2A                                                             | 0.35        |
| 15 | COX5B       | Cytochrome c oxidase subunit 5B, mitochondrial                          | 0.32        |
| 16 | YBX1        | Nuclease-sensitive element-binding protein 1                            | 0.32        |
| 17 | HSPE1       | 10 kDa heat shock protein, mitochondrial                                | 0.31        |
| 18 | SDHB        | Succinate dehydrogenase [ubiquinone] iron-sulfur subunit, mitochondrial | 0.31        |
| 19 | ATP5A1      | ATP synthase subunit alpha, mitochondrial                               | 0.31        |
| 20 | EPB41L2     | Band 4.1-like protein 2                                                 | 0.31        |
| 21 | STOML2      | Stomatin-like protein 2, mitochondrial                                  | 0.31        |
| 22 | SRSF3       | Serine/arginine-rich splicing factor 3                                  | 0.30        |
| 23 | MDH2        | Malate dehydrogenase, mitochondrial                                     | 0.30        |
| 24 | CAPNS1      | Calpain small subunit 1                                                 | 0.29        |
| 25 | ACADVL      | Very long-chain-specific acyl-CoA dehydrogenase, mitochondrial          | 0.28        |
| 26 | ATP5O       | ATP synthase subunit O, mitochondrial                                   | 0.28        |
| 27 | ACTC1       | Actin, alpha cardiac muscle 1                                           | 0.27        |
| 28 | SHMT2       | Serine hydroxymethyltransferase                                         | 0.27        |
| 29 | GAPDH       | Glyceraldehyde-3-phosphate dehydrogenase                                | 0.26        |
| 30 | UQCRB       | Cytochrome b-c1 complex subunit 7                                       | 0.26        |
| 31 | HSPA8       | Heat shock cognate 71 kDa protein                                       | 0.26        |
| 32 | S100A11     | Protein S100-A11 (Calgizzarin)                                          | 0.25        |
| 33 | LAMP2       | Lysosome-associated membrane glycoprotein                               | 0.25        |
| 34 | PSIP1       | PC4 and SFRS1-interacting protein                                       | 0.25        |
| 35 | MATR3       | Matrin-3                                                                | 0.25        |
| 36 | ATP2A2      | Sarcoplasmic/endoplasmic reticulum calcium ATPase 2                     | 0.25        |
| 37 | PPIA        | Peptidyl-prolyl cis-trans isomerase A                                   | 0.24        |
| 38 | PHC3        | Polyhomeotic-like protein 3                                             | 0.24        |
| 39 | RPLP1       | 60S acidic ribosomal protein P1                                         | 0.23        |
| 40 | HNRNPA1     | Heterogeneous nuclear ribonucleoprotein A1                              | 0.23        |
| 41 | SLC25A11    | Mitochondrial 2-oxoglutarate/malate carrier protein                     | 0.23        |
| 42 | EPHX1       | Epoxide hydrolase 1                                                     | 0.23        |
| 43 | H2AFX       | Histone H2AX                                                            | 0.23        |

|    |              |                                                                          |      |
|----|--------------|--------------------------------------------------------------------------|------|
| 44 | ACTB         | Actin, cytoplasmic 1                                                     | 0.22 |
| 45 | SFXN1        | Sideroflexin-1                                                           | 0.22 |
| 46 | ATP5J2-PTCD1 | ATP synthase membrane subunit f                                          | 0.22 |
| 47 | FAM162A      | Protein FAM162A                                                          | 0.21 |
| 48 | ALYREF       | THO complex subunit 4                                                    | 0.21 |
| 49 | FAM71E1      | Protein FAM71E1                                                          | 0.21 |
| 50 | SEC61B       | Protein transport protein Sec61 subunit beta                             | 0.21 |
| 51 | PPIB         | Peptidyl-prolyl cis-trans isomerase B                                    | 0.21 |
| 52 | BANF1        | Barrier-to-autointegration factor                                        | 0.21 |
| 53 | OCIAD1       | OCIA domain-containing protein 1                                         | 0.20 |
| 54 | COX7C        | Cytochrome c oxidase subunit 7C, mitochondrial                           | 0.20 |
| 55 | ENO1         | Alpha-enolase                                                            | 0.20 |
| 56 | IGF2BP1      | Insulin-like growth factor 2 mRNA-binding protein 1                      | 0.19 |
| 57 | HSPA5        | 78 kDa glucose-regulated protein                                         | 0.19 |
| 58 | IMMT         | MICOS complex subunit MIC60                                              | 0.19 |
| 59 | DDX5         | Probable ATP-dependent RNA helicase DDX5                                 | 0.19 |
| 60 | RCC1         | Regulator of chromosome condensation                                     | 0.19 |
| 61 | BCAP31       | B-cell receptor-associated protein 31                                    | 0.19 |
| 62 | PGRMC1       | Membrane-associated progesterone receptor component 1                    | 0.18 |
| 63 | DNA2         | DNA replication ATP-dependent helicase/nuclease DNA2                     | 0.18 |
| 64 | ENO2         | Gamma-enolase                                                            | 0.18 |
| 65 | STAR         | Steroidogenic acute regulatory protein, mitochondrial                    | 0.18 |
| 66 | RAB7A        | Ras-related protein Rab-7a                                               | 0.18 |
| 67 | CISD1        | CDGSH iron-sulfur domain-containing protein 1                            | 0.18 |
| 68 | FUBP1        | Far upstream element-binding protein 1                                   | 0.18 |
| 69 | UQCR10       | Cytochrome b-c1 complex subunit 9                                        | 0.18 |
| 70 | SUB1         | Activated RNA polymerase II transcriptional coactivator p15              | 0.17 |
| 71 | SCAMP1       | Secretory carrier-associated membrane protein                            | 0.17 |
| 72 | HADHA        | Trifunctional enzyme subunit alpha, mitochondrial                        | 0.16 |
| 73 | LRRC59       | Leucine-rich repeat-containing protein 59                                | 0.16 |
| 74 | EIF5A        | Eukaryotic translation initiation factor 5A                              | 0.16 |
| 75 | CORO7-PAM16  | Coronin                                                                  | 0.15 |
| 76 | TIMM9        | Mitochondrial import inner membrane translocase subunit Tim9             | 0.15 |
| 77 | RPN1         | Dolichyl-diphosphooligosaccharide--protein glycosyltransferase subunit 1 | 0.15 |
| 78 | PRDX1        | Peroxiredoxin-1                                                          | 0.14 |
| 79 | CYCS         | Cytochrome c                                                             | 0.14 |
| 80 | HSP90AA1     | Heat shock protein HSP 90-alpha                                          | 0.14 |
| 81 | CCDC74A      | Coiled-coil domain-containing protein 74A                                | 0.14 |
| 82 | PDIA3        | Protein disulfide-isomerase A3                                           | 0.13 |
| 83 | TAGLN2       | Transgelin-2                                                             | 0.13 |
| 84 | COX5A        | Cytochrome c oxidase subunit 5A, mitochondrial                           | 0.13 |
| 85 | NDUFA4       | Cytochrome c oxidase subunit NDUFA4                                      | 0.13 |
| 86 | ANXA2        | Annexin                                                                  | 0.13 |
| 87 | RBMX         | RNA-binding motif protein, X chromosome                                  | 0.13 |
| 88 | HNRNPH1      | Heterogeneous nuclear ribonucleoprotein H                                | 0.13 |
| 89 | HMGB1        | High mobility group protein B1                                           | 0.12 |
| 90 | HADH         | Hydroxyacyl-coenzyme A dehydrogenase, mitochondrial                      | 0.12 |
| 91 | NPM1         | Nucleophosmin                                                            | 0.11 |
| 92 | PTBP1        | Polypyrimidine tract-binding protein 1                                   | 0.11 |
| 93 | NDUFA5       | NADH dehydrogenase [ubiquinone] 1 alpha subcomplex subunit 5             | 0.11 |



|     |          |                                                                |      |
|-----|----------|----------------------------------------------------------------|------|
| 94  | ATP5H    | ATP synthase subunit d, mitochondrial                          | 0.11 |
| 95  | PDCD5    | Programmed cell death protein 5                                | 0.10 |
| 96  | SNRPC    | U1 small nuclear ribonucleoprotein C                           | 0.10 |
| 97  | SCP2     | Non-specific lipid-transfer protein                            | 0.10 |
| 98  | SSR3     | Translocon-associated protein subunit gamma                    | 0.10 |
| 99  | MTDH     | Protein LYRIC (Metadherin)                                     | 0.09 |
| 100 | CALM2    | Calmodulin                                                     | 0.09 |
| 101 | HNRNPC   | Heterogeneous nuclear ribonucleoproteins C1/C2                 | 0.09 |
| 102 | NDUFB10  | NADH dehydrogenase [ubiquinone] 1 beta subcomplex subunit 10   | 0.09 |
| 103 | MRPS35   | 28S ribosomal protein S35, mitochondrial                       | 0.08 |
| 104 | TECR     | Very-long-chain enoyl-CoA reductase                            | 0.08 |
| 105 | PDIA6    | Protein disulfide-isomerase A6                                 | 0.08 |
| 106 | SRSF1    | Serine/arginine-rich splicing factor 1                         | 0.06 |
| 107 | LMAN2    | Vesicular integral-membrane protein VIP36                      | 0.06 |
| 108 | DOCK8    | Dedicator of cytokinesis protein 8                             | 0.05 |
| 109 | SYCP2    | Synaptonemal complex protein 2                                 | 0.05 |
| 110 | GOT2     | Aspartate aminotransferase, mitochondrial                      | 0.04 |
| 111 | HS3ST3B1 | Heparan sulfate glucosamine 3-O-sulfotransferase 3B1           | 0.04 |
| 112 | HMG2     | Non-histone chromosomal protein HMG-17                         | 0.02 |
| 113 | UACA     | Uveal autoantigen with coiled-coil domains and ankyrin repeats | 0.02 |
| 114 | ANXA5    | Annexin A5                                                     | 0.01 |
| 115 | TIRAP    | Toll/interleukin-1 receptor domain-containing adapter protein  | 0.01 |
| 116 | TAF15    | TATA-binding protein-associated factor 2N                      | 0.00 |

---

**Studies of glyoxalase 1-linked multidrug resistance reveal glycolysis-derived reactive metabolite, methylglyoxal, is a common contributor in cancer chemotherapy targeting the spliceosome.**

Muhanad Alhujaily et al.

**Table S11. Proteins of the mitochondrial membrane extract containing MG-H1 residues and changed in abundance by HEK293 cell treatment with methylglyoxal**

| No | Gene    | Name of protein                                                | Fold change |
|----|---------|----------------------------------------------------------------|-------------|
| 1  | GRIN2D  | Glutamate receptor ionotropic, NMDA 2D                         | 4.44        |
| 2  | GRM6    | Metabotropic glutamate receptor 6                              | 2.71        |
| 3  | TOPAZ1  | Testis- and ovary-specific PAZ domain-containing protein 1     | 0.53        |
| 4  | ACADVL  | Very long-chain-specific acyl-CoA dehydrogenase, mitochondrial | 0.28        |
| 5  | PHC3    | Polyhomeotic-like protein 3                                    | 0.24        |
| 6  | FAM71E1 | Protein FAM71E1                                                | 0.21        |
| 7  | ENO2    | Gamma-enolase                                                  | 0.18        |
| 8  | STAR    | Steroidogenic acute regulatory protein, mitochondrial          | 0.18        |
| 9  | CCDC74A | Coiled-coil domain-containing protein 74A                      | 0.14        |
| 10 | DOCK8   | Dedicator of cytokinesis protein 8                             | 0.05        |
| 11 | SYCP2   | Synaptonemal complex protein 2                                 | 0.05        |
| 12 | TIRAP   | Toll/interleukin-1 receptor domain-containing adapter protein  | 0.01        |

**Studies of glyoxalase 1-linked multidrug resistance reveal glycolysis-derived reactive metabolite, methylglyoxal, is a common contributor in cancer chemotherapy targeting the spliceosome.**

Muhanad Alhujaily et al.

**Table S12. Correlation of gene expression with Glo1 in the CCLE database of human tumor cell lines.**

| Correlation coefficients (Pearson) |       |                       |        |
|------------------------------------|-------|-----------------------|--------|
| Positive correlations              |       | negative correlations |        |
| Gene correlate                     | r     | Gene correlate        | r      |
| 1 PPIL1                            | 0.568 | 1 CHAC1               | -0.134 |
| 2 RPL7L1                           | 0.566 | 2 PDXK                | -0.134 |
| 3 PRIM2                            | 0.531 | 3 NR1H3               | -0.134 |
| 4 CDC5L                            | 0.517 | 4 FBXW8               | -0.135 |
| 5 CCT4                             | 0.506 | 5 ZSWIM8              | -0.135 |
| 6 CENPQ                            | 0.489 | 6 TMEM143             | -0.135 |
| 7 SF3B14                           | 0.481 | 7 SLC39A3             | -0.135 |
| 8 SNRPC                            | 0.479 | 8 RP11.849H4.4        | -0.135 |
| 9 CSE1L                            | 0.463 | 9 DDIT4               | -0.135 |
| 10 AC107081.5                      | 0.458 | 10 SUSD1              | -0.135 |
| 11 GPN3                            | 0.454 | 11 FBXW4              | -0.135 |
| 12 TAF11                           | 0.449 | 12 KCNN4              | -0.135 |
| 13 TTK                             | 0.447 | 13 STAG3L5P.PV        | -0.135 |
| 14 RPS10                           | 0.445 | 14 CTSA               | -0.135 |
| 15 RAD54B                          | 0.445 | 15 MBD1               | -0.135 |
| 16 LSM12                           | 0.443 | 16 SDHAP1             | -0.135 |
| 17 LSM2                            | 0.438 | 17 CTC.512J14.5       | -0.136 |
| 18 CDK1                            | 0.436 | 18 MOGS               | -0.136 |
| 19 RNF8                            | 0.434 | 19 TOM1L2             | -0.136 |
| 20 XPO1                            | 0.431 | 20 WDR13              | -0.136 |
| 21 RRP36                           | 0.428 | 21 RP11.876N24.4      | -0.136 |
| 22 RP11.355B11.2                   | 0.426 | 22 UBALD2             | -0.136 |
| 23 SRSF3                           | 0.424 | 23 ITPKC              | -0.136 |
| 24 MRPL19                          | 0.423 | 24 RP11.425L10.1      | -0.136 |
| 25 MTERFD1                         | 0.418 | 25 ITPR3              | -0.136 |
| 26 GMPS                            | 0.418 | 26 CD44               | -0.136 |
| 27 GMNN                            | 0.417 | 27 KIF13B             | -0.136 |
| 28 SRP9                            | 0.414 | 28 PILRB              | -0.136 |
| 29 LRRC40                          | 0.414 | 29 DUSP28             | -0.136 |
| 30 MAD2L1                          | 0.413 | 30 RASSF7             | -0.136 |
| 31 PAK1IP1                         | 0.413 | 31 SEC24C             | -0.137 |
| 32 ERCC6L                          | 0.412 | 32 SLC3A2             | -0.137 |
| 33 SUMO1                           | 0.411 | 33 AGAP10             | -0.137 |
| 34 HSP90AB1                        | 0.410 | 34 PRDX5              | -0.137 |
| 35 ORC3                            | 0.410 | 35 ANAPC2             | -0.137 |
| 36 OLA1                            | 0.410 | 36 MCEE               | -0.137 |
| 37 MIR3917                         | 0.407 | 37 ANKRD10            | -0.137 |
| 38 HDAC2                           | 0.406 | 38 EXOC3              | -0.137 |
| 39 LIN9                            | 0.406 | 39 NCOR2              | -0.137 |
| 40 NDC1                            | 0.403 | 40 AKAP17A            | -0.137 |

|                 |       |                  |        |
|-----------------|-------|------------------|--------|
| 41 HNRNPC       | 0.401 | 41 MTND1P23      | -0.137 |
| 42 PPP2R5D      | 0.400 | 42 LMAN2         | -0.137 |
| 43 NUP54        | 0.400 | 43 CCDC146       | -0.137 |
| 44 MRPL42       | 0.399 | 44 CYTH2         | -0.137 |
| 45 NUDCD1       | 0.397 | 45 DCUN1D3       | -0.137 |
| 46 UQCC2        | 0.396 | 46 SERINC2       | -0.138 |
| 47 MRPS10       | 0.396 | 47 C21orf2       | -0.138 |
| 48 RPF2         | 0.396 | 48 WBP1          | -0.138 |
| 49 NUP155       | 0.395 | 49 LINC00999     | -0.138 |
| 50 SPC25        | 0.393 | 50 DNAJC3        | -0.138 |
| 51 BTF3L4       | 0.392 | 51 EIF2S3L       | -0.138 |
| 52 NOL11        | 0.392 | 52 ZNF213        | -0.138 |
| 53 SKA2         | 0.391 | 53 RABGGTA       | -0.138 |
| 54 PTGES3       | 0.390 | 54 B4GALT1       | -0.138 |
| 55 CCDC138      | 0.389 | 55 MT.RNR1       | -0.138 |
| 56 MRPL47       | 0.389 | 56 ZNFX1         | -0.138 |
| 57 CCT8         | 0.389 | 57 FADS3         | -0.138 |
| 58 RRM1.AS1     | 0.388 | 58 MIR22HG       | -0.138 |
| 59 NUP43        | 0.388 | 59 COL7A1        | -0.138 |
| 60 MATR3        | 0.387 | 60 IRF2          | -0.138 |
| 61 PCNP         | 0.386 | 61 ARHGAP26      | -0.139 |
| 62 DFFA         | 0.386 | 62 FAM214B       | -0.139 |
| 63 ZBTB9        | 0.386 | 63 ZNF408        | -0.139 |
| 64 NUP35        | 0.386 | 64 TAGLN2        | -0.139 |
| 65 RPP40        | 0.385 | 65 RP11.1246C19. | -0.139 |
| 66 SUV39H2      | 0.385 | 66 TMC4          | -0.139 |
| 67 KHDRBS1      | 0.385 | 67 JAG1          | -0.139 |
| 68 CCT7         | 0.384 | 68 SIL1          | -0.139 |
| 69 GLMN         | 0.384 | 69 PER2          | -0.139 |
| 70 MELK         | 0.384 | 70 CASP8         | -0.139 |
| 71 SGOL2        | 0.384 | 71 WDR90         | -0.139 |
| 72 DHFR         | 0.383 | 72 TMEM62        | -0.139 |
| 73 UTP11L       | 0.382 | 73 AC005154.6    | -0.139 |
| 74 TRMT10C      | 0.382 | 74 XBP1          | -0.139 |
| 75 METTL2A      | 0.382 | 75 GLG1          | -0.140 |
| 76 IPO11        | 0.382 | 76 ANKS3         | -0.140 |
| 77 PSMC1        | 0.381 | 77 ZNF628        | -0.140 |
| 78 KNSTRN       | 0.381 | 78 CCDC107       | -0.140 |
| 79 CKS1B        | 0.381 | 79 CTSK          | -0.140 |
| 80 USP1         | 0.380 | 80 CTD.2547E10.1 | -0.140 |
| 81 MAD2L1BP     | 0.380 | 81 RP11.296I10.6 | -0.140 |
| 82 MRPL13       | 0.378 | 82 RP11.680G24.5 | -0.140 |
| 83 NPM1         | 0.378 | 83 AC084018.1    | -0.140 |
| 84 CENPI        | 0.377 | 84 KIAA0895L     | -0.140 |
| 85 RP11.342K6.1 | 0.376 | 85 ITGA3         | -0.141 |
| 86 PSMD12       | 0.376 | 86 VPS13C        | -0.141 |
| 87 VTA1         | 0.376 | 87 RNH1          | -0.141 |
| 88 PCGF6        | 0.375 | 88 TECPR1        | -0.141 |

|                  |       |                   |        |
|------------------|-------|-------------------|--------|
| 89 KPNA2         | 0.375 | 89 ITGB1P1        | -0.141 |
| 90 CDC25C        | 0.375 | 90 KRT8P33        | -0.141 |
| 91 RP11.138C9.1  | 0.374 | 91 ARID5A         | -0.141 |
| 92 HSPA4         | 0.374 | 92 KRCC1          | -0.141 |
| 93 BYSL          | 0.374 | 93 CDKN1A         | -0.141 |
| 94 XPO5          | 0.374 | 94 TRIM52         | -0.142 |
| 95 NAE1          | 0.374 | 95 ADHFE1         | -0.142 |
| 96 KIF11         | 0.373 | 96 ARHGAP23       | -0.142 |
| 97 TCP1          | 0.373 | 97 MAP3K11        | -0.142 |
| 98 COQ3          | 0.373 | 98 CDK6           | -0.142 |
| 99 APOO          | 0.372 | 99 RP11.927P21.1  | -0.142 |
| 100 KIAA0101     | 0.371 | 100 ATP13A1       | -0.142 |
| 101 CHAF1B       | 0.370 | 101 RPS2P7        | -0.142 |
| 102 XRCC5        | 0.370 | 102 MT.ND2        | -0.142 |
| 103 HAT1         | 0.369 | 103 NME3          | -0.142 |
| 104 PAICS        | 0.369 | 104 TMED9         | -0.142 |
| 105 PNO1         | 0.369 | 105 ERVK13.1      | -0.142 |
| 106 COIL         | 0.368 | 106 OGT           | -0.142 |
| 107 GTF3C4       | 0.368 | 107 ADRBK1        | -0.143 |
| 108 TPRKB        | 0.368 | 108 DHX38         | -0.143 |
| 109 UTP18        | 0.368 | 109 S100A6        | -0.143 |
| 110 DCLRE1B      | 0.367 | 110 RP11.263K19.6 | -0.143 |
| 111 MLF1IP       | 0.367 | 111 AC005594.3    | -0.143 |
| 112 MTBP         | 0.366 | 112 TTC17         | -0.143 |
| 113 CEP78        | 0.366 | 113 CTU1          | -0.143 |
| 114 NAA15        | 0.366 | 114 FER1L4        | -0.143 |
| 115 CTD.2510F5.4 | 0.366 | 115 CTSC          | -0.143 |
| 116 CDC27        | 0.365 | 116 RP11.347C12.2 | -0.144 |
| 117 TAF9B        | 0.364 | 117 TMEM63A       | -0.144 |
| 118 TIPIN        | 0.364 | 118 PROB1         | -0.144 |
| 119 NUSAP1       | 0.364 | 119 FBXW7         | -0.144 |
| 120 PARPBP       | 0.363 | 120 GP1BA         | -0.144 |
| 121 MRPL14       | 0.363 | 121 RP11.458F8.4  | -0.144 |
| 122 AHCTF1       | 0.361 | 122 RP4.669L17.10 | -0.144 |
| 123 FKBPL        | 0.361 | 123 DNAJB2        | -0.144 |
| 124 AMD1         | 0.361 | 124 ENKD1         | -0.144 |
| 125 RP11.360L9.7 | 0.361 | 125 SEL1L3        | -0.144 |
| 126 MMS22L       | 0.361 | 126 CUX1          | -0.144 |
| 127 SNRNP40      | 0.360 | 127 SEC24D        | -0.144 |
| 128 SSB          | 0.360 | 128 TMEM87B       | -0.144 |
| 129 MRPL22       | 0.360 | 129 CMIP          | -0.144 |
| 130 RFC5         | 0.360 | 130 RP11.446E9.1  | -0.144 |
| 131 DEK          | 0.359 | 131 FAM193B       | -0.144 |
| 132 FAM98B       | 0.359 | 132 RPL24P4       | -0.144 |
| 133 RAD51AP1     | 0.359 | 133 RP11.498C9.2  | -0.144 |
| 134 NCAPG        | 0.358 | 134 LBX2.AS1      | -0.144 |
| 135 PSMB1        | 0.358 | 135 TAZ           | -0.145 |
| 136 SNRPE        | 0.357 | 136 CHD2          | -0.145 |

|                   |       |                  |        |
|-------------------|-------|------------------|--------|
| 137 HNRNPK        | 0.357 | 137 CCDC85B      | -0.145 |
| 138 VDAC2         | 0.357 | 138 FERMT3       | -0.146 |
| 139 DYNC1LI1      | 0.357 | 139 MFSD3        | -0.146 |
| 140 CCNB1         | 0.357 | 140 RPS6KA2      | -0.146 |
| 141 VBP1          | 0.356 | 141 TYK2         | -0.146 |
| 142 EEF1E1        | 0.356 | 142 GGT1         | -0.146 |
| 143 HSPD1P1       | 0.355 | 143 TPST2        | -0.146 |
| 144 RP11.303E16.8 | 0.355 | 144 IFI27        | -0.146 |
| 145 SNRPD1        | 0.354 | 145 PSMC1P1      | -0.146 |
| 146 PBK           | 0.354 | 146 MYCBP2       | -0.146 |
| 147 GEMIN6        | 0.354 | 147 RPS7P10      | -0.146 |
| 148 FBXO5         | 0.354 | 148 MPPE1        | -0.146 |
| 149 CACYBP        | 0.353 | 149 NCOA3        | -0.146 |
| 150 SLC25A17      | 0.353 | 150 CIC          | -0.146 |
| 151 HBS1L         | 0.353 | 151 ZNF784       | -0.147 |
| 152 RFC4          | 0.353 | 152 ELL2         | -0.147 |
| 153 UBE2N         | 0.352 | 153 FAM156A      | -0.147 |
| 154 RP11.15L13.4  | 0.352 | 154 PIGQ         | -0.147 |
| 155 CDC7          | 0.352 | 155 ABHD17A      | -0.147 |
| 156 NUF2          | 0.352 | 156 CATSPER2P1   | -0.147 |
| 157 TOP2A         | 0.352 | 157 GPR89B       | -0.147 |
| 158 EIF4E         | 0.351 | 158 TNK2         | -0.147 |
| 159 IPO7          | 0.351 | 159 AC132872.1   | -0.147 |
| 160 RP11.342K6.2  | 0.350 | 160 CYLD         | -0.147 |
| 161 SMIM13        | 0.350 | 161 FICD         | -0.147 |
| 162 PFDN6         | 0.350 | 162 LMF2         | -0.147 |
| 163 RRM1          | 0.350 | 163 SPTBN1       | -0.147 |
| 164 AL590762.1    | 0.350 | 164 AC007969.5   | -0.147 |
| 165 GCFC2         | 0.349 | 165 AC000068.9   | -0.148 |
| 166 PTTG1         | 0.349 | 166 PCNXL3       | -0.148 |
| 167 ESCO2         | 0.349 | 167 LAMP1        | -0.148 |
| 168 CCT5          | 0.349 | 168 RINL         | -0.148 |
| 169 XRCC6         | 0.349 | 169 NLRP1        | -0.148 |
| 170 NUP37         | 0.349 | 170 PLEC         | -0.148 |
| 171 TUBD1         | 0.349 | 171 BMS1P5       | -0.148 |
| 172 RPF1          | 0.348 | 172 MFSD10       | -0.148 |
| 173 ZWILCH        | 0.348 | 173 GBAP1        | -0.148 |
| 174 DSCC1         | 0.348 | 174 SRCAP        | -0.148 |
| 175 KPNB1         | 0.348 | 175 RHOG         | -0.148 |
| 176 MCM10         | 0.348 | 176 DGKQ         | -0.148 |
| 177 ISCA1         | 0.348 | 177 AGAP7        | -0.149 |
| 178 ST13          | 0.348 | 178 RP11.258F1.1 | -0.149 |
| 179 GCSH          | 0.347 | 179 SMAD7        | -0.149 |
| 180 CEP57L1       | 0.347 | 180 CLASRP       | -0.149 |
| 181 STIL          | 0.347 | 181 VPS39        | -0.149 |
| 182 PDCL3         | 0.347 | 182 POLM         | -0.149 |
| 183 BRIX1         | 0.347 | 183 ELF1         | -0.149 |
| 184 BCCIP         | 0.347 | 184 TMEM80       | -0.149 |

|                   |       |                   |        |
|-------------------|-------|-------------------|--------|
| 185 OSGEPL1       | 0.346 | 185 AMY2B         | -0.149 |
| 186 HSF2          | 0.346 | 186 TMEM258       | -0.149 |
| 187 PPP1CC        | 0.346 | 187 RP11.143J12.2 | -0.150 |
| 188 RMI1          | 0.346 | 188 VAMP8         | -0.150 |
| 189 CSNK2B        | 0.346 | 189 TCF25         | -0.150 |
| 190 NSL1          | 0.345 | 190 SPNS1         | -0.150 |
| 191 CENPW         | 0.345 | 191 ANKZF1        | -0.150 |
| 192 VDAC3         | 0.345 | 192 CAPG          | -0.150 |
| 193 SERBP1        | 0.345 | 193 TBC1D3H       | -0.150 |
| 194 RPAP3         | 0.345 | 194 AP001062.7    | -0.151 |
| 195 CTB.43P18.1   | 0.344 | 195 AIM1          | -0.151 |
| 196 UBE2T         | 0.344 | 196 VIMP          | -0.151 |
| 197 UCHL5         | 0.343 | 197 GSTK1         | -0.151 |
| 198 GINS4         | 0.343 | 198 ABHD4         | -0.151 |
| 199 SET           | 0.343 | 199 TXNDC5        | -0.151 |
| 200 LSM5          | 0.342 | 200 CCNL1         | -0.151 |
| 201 AUNIP         | 0.342 | 201 AC009404.2    | -0.151 |
| 202 PSMB3         | 0.342 | 202 TRAF3IP2      | -0.151 |
| 203 LSM3          | 0.342 | 203 CBLB          | -0.151 |
| 204 CCDC58        | 0.342 | 204 PGAM4         | -0.151 |
| 205 ZW10          | 0.341 | 205 TSC22D4       | -0.151 |
| 206 TRIP13        | 0.341 | 206 IDS           | -0.151 |
| 207 TFAM          | 0.341 | 207 ATAD3C        | -0.151 |
| 208 PSMD14        | 0.341 | 208 ARHGEF2       | -0.152 |
| 209 POLR1C        | 0.341 | 209 OTUD5         | -0.152 |
| 210 SGOL1         | 0.340 | 210 INE1          | -0.152 |
| 211 STMN1         | 0.340 | 211 MAN2B1        | -0.152 |
| 212 ATP5F1        | 0.340 | 212 JUND          | -0.152 |
| 213 DLGAP5        | 0.340 | 213 ZFAND2A       | -0.152 |
| 214 PPP2CA        | 0.340 | 214 RP11.361D15.2 | -0.152 |
| 215 DDX20         | 0.340 | 215 ASMTL.AS1     | -0.152 |
| 216 ILF2          | 0.339 | 216 HCLS1         | -0.152 |
| 217 DNA2          | 0.339 | 217 TMEM129       | -0.152 |
| 218 DEPDC1        | 0.339 | 218 HNRNPA1P10    | -0.152 |
| 219 COPS2         | 0.339 | 219 RP11.274B21.1 | -0.152 |
| 220 SUMO2         | 0.339 | 220 NSUN5P1       | -0.152 |
| 221 GEMIN5        | 0.339 | 221 NOMO3         | -0.152 |
| 222 CCT2          | 0.339 | 222 GUK1          | -0.152 |
| 223 POLE2         | 0.339 | 223 RDH14         | -0.152 |
| 224 KIFC1         | 0.338 | 224 SQSTM1        | -0.152 |
| 225 RP5.1113E3.3  | 0.338 | 225 TPP1          | -0.153 |
| 226 DHX9          | 0.337 | 226 ACSF3         | -0.153 |
| 227 NUP107        | 0.337 | 227 SLC25A45      | -0.153 |
| 228 MCM3          | 0.337 | 228 ANXA2P2       | -0.153 |
| 229 KIF15         | 0.337 | 229 CLEC16A       | -0.153 |
| 230 MRPL50        | 0.337 | 230 RP11.39C10.1  | -0.153 |
| 231 RP11.474G23.2 | 0.337 | 231 WWP2          | -0.153 |
| 232 RACGAP1       | 0.336 | 232 ARPC1B        | -0.153 |

|              |       |                   |        |
|--------------|-------|-------------------|--------|
| 233 CCT3     | 0.336 | 233 ARPC2         | -0.153 |
| 234 HPRT1    | 0.336 | 234 PSKH1         | -0.153 |
| 235 CBX1     | 0.336 | 235 SLC10A3       | -0.153 |
| 236 ATAD2    | 0.336 | 236 AP003068.9    | -0.153 |
| 237 ORC4     | 0.336 | 237 RRN3P1        | -0.154 |
| 238 TMEM14B  | 0.336 | 238 RNF31         | -0.154 |
| 239 LTV1     | 0.335 | 239 BMS1P1        | -0.154 |
| 240 TIMM8A   | 0.335 | 240 RP3.368A4.6   | -0.154 |
| 241 HNRNPA3  | 0.335 | 241 NFE2L1        | -0.154 |
| 242 MIS18A   | 0.335 | 242 FTX           | -0.154 |
| 243 RFC2     | 0.335 | 243 TNRC18        | -0.154 |
| 244 KIF4A    | 0.335 | 244 CTD.3126B10.  | -0.154 |
| 245 DTL      | 0.334 | 245 RP11.347C12.1 | -0.154 |
| 246 RPA2     | 0.334 | 246 TBC1D2        | -0.154 |
| 247 C11orf82 | 0.334 | 247 IFI27L2       | -0.155 |
| 248 SSX2IP   | 0.334 | 248 PDF           | -0.155 |
| 249 ARMC1    | 0.334 | 249 SLC12A9       | -0.155 |
| 250 RFC3     | 0.334 | 250 HLA.F         | -0.155 |
| 251 GNAI3    | 0.334 | 251 NUCB1.AS1     | -0.155 |
| 252 DONSON   | 0.334 | 252 LAT2          | -0.155 |
| 253 SLC25A33 | 0.333 | 253 CCDC78        | -0.155 |
| 254 ELAVL1   | 0.333 | 254 CTBP1         | -0.155 |
| 255 ASNSD1   | 0.333 | 255 HLA.C         | -0.156 |
| 256 TIMM23B  | 0.333 | 256 RP11.493K19.3 | -0.156 |
| 257 DARS2    | 0.333 | 257 RP11.179G5.1  | -0.156 |
| 258 CCNB2    | 0.333 | 258 AC021224.1    | -0.156 |
| 259 MDH1     | 0.333 | 259 NARFL         | -0.156 |
| 260 PSMG1    | 0.333 | 260 VDAC1P1       | -0.156 |
| 261 SMC3     | 0.333 | 261 RP11.20I23.8  | -0.156 |
| 262 DBF4     | 0.333 | 262 NPIPA5        | -0.156 |
| 263 UBA2     | 0.332 | 263 GOLGA6L5      | -0.156 |
| 264 DSN1     | 0.332 | 264 HLA.DMA       | -0.156 |
| 265 POLA1    | 0.331 | 265 RP11.395L14.1 | -0.157 |
| 266 DENR     | 0.331 | 266 MYH9          | -0.157 |
| 267 NEDD1    | 0.330 | 267 NUCB1         | -0.157 |
| 268 EIF1AX   | 0.330 | 268 DPP7          | -0.157 |
| 269 SKA3     | 0.330 | 269 FUK           | -0.157 |
| 270 UNG      | 0.330 | 270 IER2          | -0.157 |
| 271 DCAF13   | 0.329 | 271 WDR81         | -0.157 |
| 272 AASDHPPT | 0.329 | 272 STX5          | -0.157 |
| 273 HSPE1    | 0.329 | 273 EML2          | -0.157 |
| 274 MCMBP    | 0.328 | 274 ZNF319        | -0.157 |
| 275 ZCRB1    | 0.328 | 275 PBXIP1        | -0.157 |
| 276 WDYHV1   | 0.328 | 276 HNRNPA1P7     | -0.157 |
| 277 GART     | 0.328 | 277 CCM2          | -0.157 |
| 278 SNRPB    | 0.328 | 278 FAM203B       | -0.157 |
| 279 ANKRD32  | 0.327 | 279 AL162151.3    | -0.158 |
| 280 UBXN2A   | 0.327 | 280 ELMO3         | -0.158 |



|                   |       |                   |        |
|-------------------|-------|-------------------|--------|
| 281 HNRNPA1       | 0.327 | 281 RPL5P4        | -0.158 |
| 282 TMEM177       | 0.327 | 282 CTSD          | -0.158 |
| 283 ETF1          | 0.327 | 283 ACBD4         | -0.158 |
| 284 MED20         | 0.327 | 284 UBQLN4P1      | -0.158 |
| 285 SNRPG         | 0.327 | 285 OVGP1         | -0.159 |
| 286 NUP153        | 0.327 | 286 TBC1D10A      | -0.159 |
| 287 HAUS6         | 0.326 | 287 TRABD         | -0.159 |
| 288 GINS1         | 0.326 | 288 MXD4          | -0.159 |
| 289 FANCB         | 0.325 | 289 SDHAP2        | -0.159 |
| 290 TAF1B         | 0.325 | 290 RRBPI         | -0.160 |
| 291 CENPL         | 0.325 | 291 FKBP2         | -0.160 |
| 292 ORC2          | 0.325 | 292 RP5.1142A6.9  | -0.160 |
| 293 WDR75         | 0.325 | 293 TBRG1         | -0.160 |
| 294 MRTO4         | 0.324 | 294 STUB1         | -0.160 |
| 295 RBMXL1        | 0.324 | 295 DDA1          | -0.160 |
| 296 MCUR1         | 0.324 | 296 MOB2          | -0.160 |
| 297 MAGOHB        | 0.324 | 297 GADD45A       | -0.160 |
| 298 PPAT          | 0.324 | 298 SLC7A7        | -0.160 |
| 299 CCT6A         | 0.324 | 299 MGRN1         | -0.160 |
| 300 UBE2V2        | 0.324 | 300 ZMIZ2         | -0.160 |
| 301 MRPS22        | 0.323 | 301 RP11.112J3.15 | -0.160 |
| 302 CTD.2256P15.4 | 0.323 | 302 ANKH          | -0.160 |
| 303 SKP2          | 0.323 | 303 BANF1P3       | -0.161 |
| 304 PHF13         | 0.323 | 304 AFF1          | -0.161 |
| 305 TMPO          | 0.323 | 305 TMEM243       | -0.161 |
| 306 MRPL39        | 0.323 | 306 CAPN1         | -0.161 |
| 307 ZMYM1         | 0.323 | 307 ANXA11        | -0.161 |
| 308 ABCE1         | 0.322 | 308 SLC8B1        | -0.161 |
| 309 CCZ1B         | 0.322 | 309 MANBA         | -0.161 |
| 310 MRPL3         | 0.322 | 310 MPRIPP1       | -0.161 |
| 311 FAM104B       | 0.322 | 311 AMT           | -0.161 |
| 312 TUBB          | 0.322 | 312 RP11.572P18.1 | -0.162 |
| 313 CDKN2AIPNL    | 0.321 | 313 API5P1        | -0.162 |
| 314 BAG4          | 0.321 | 314 RP5.1050D4.2  | -0.162 |
| 315 CCNE2         | 0.321 | 315 CAPS          | -0.162 |
| 316 SPAG5         | 0.321 | 316 LA16c.349E10. | -0.162 |
| 317 ERAL1         | 0.321 | 317 RP11.252A24.2 | -0.162 |
| 318 CMSS1         | 0.321 | 318 F8A2          | -0.162 |
| 319 TOMM22        | 0.320 | 319 RP11.146F11.1 | -0.162 |
| 320 NUFIP1        | 0.320 | 320 MNT           | -0.162 |
| 321 NEK2          | 0.320 | 321 NAGLU         | -0.162 |
| 322 RP11.144G7.2  | 0.320 | 322 EEF1A1P13     | -0.162 |
| 323 NDC80         | 0.319 | 323 UBE2SP2       | -0.162 |
| 324 NDUFB4        | 0.319 | 324 TNXB          | -0.162 |
| 325 EIF2S1        | 0.319 | 325 RP11.958N24.2 | -0.162 |
| 326 SKP1          | 0.319 | 326 SLC35E1       | -0.162 |
| 327 MAGOH         | 0.319 | 327 ANKRD13D      | -0.163 |
| 328 PSMA4         | 0.319 | 328 ACADVL        | -0.163 |

|                 |       |                   |        |
|-----------------|-------|-------------------|--------|
| 329 WDR46       | 0.318 | 329 DYX1C1.CCPC   | -0.163 |
| 330 TIMM23      | 0.318 | 330 BIRC3         | -0.163 |
| 331 RRM2        | 0.318 | 331 HIVEP2        | -0.163 |
| 332 DESI2       | 0.318 | 332 FASTK         | -0.163 |
| 333 MRPS23      | 0.318 | 333 HSF4          | -0.163 |
| 334 FARSB       | 0.318 | 334 CENPT         | -0.163 |
| 335 EXO1        | 0.318 | 335 RP4.800G7.2   | -0.163 |
| 336 MRPS15      | 0.317 | 336 NPIP5         | -0.163 |
| 337 MRPL51      | 0.317 | 337 TBC1D3G       | -0.163 |
| 338 HAUS1       | 0.316 | 338 LAT           | -0.163 |
| 339 PRPF4       | 0.316 | 339 ISCA1P1       | -0.163 |
| 340 C4orf46     | 0.316 | 340 HM13          | -0.163 |
| 341 KIAA1524    | 0.316 | 341 SLC52A2       | -0.163 |
| 342 USP39       | 0.316 | 342 PISD          | -0.164 |
| 343 MASTL       | 0.316 | 343 HMGN2P5       | -0.164 |
| 344 TPX2        | 0.316 | 344 POLR2J4       | -0.164 |
| 345 C2orf69     | 0.316 | 345 ALPK1         | -0.164 |
| 346 CDC6        | 0.316 | 346 C17orf59      | -0.164 |
| 347 PRIM1       | 0.316 | 347 P4HB          | -0.164 |
| 348 MSH2        | 0.315 | 348 SRPR          | -0.164 |
| 349 KIF23       | 0.315 | 349 EIF5AL1       | -0.164 |
| 350 BRIP1       | 0.315 | 350 RPS3AP25      | -0.165 |
| 351 ZNF146      | 0.315 | 351 RP11.163E9.2  | -0.165 |
| 352 SAYSD1      | 0.315 | 352 RP11.490H24.5 | -0.165 |
| 353 RPL21       | 0.314 | 353 RGPDI         | -0.165 |
| 354 BCAS2       | 0.314 | 354 RPL4P4        | -0.165 |
| 355 CETN3       | 0.314 | 355 ELL           | -0.165 |
| 356 CDC23       | 0.314 | 356 ZFAND2B       | -0.165 |
| 357 PPP3R1      | 0.314 | 357 AC073869.1    | -0.165 |
| 358 HMGB1       | 0.314 | 358 RTN3P1        | -0.165 |
| 359 ACTL6A      | 0.313 | 359 HLA.A         | -0.165 |
| 360 SF3A3       | 0.313 | 360 AC104134.2    | -0.165 |
| 361 TEX10       | 0.313 | 361 MFSD6         | -0.166 |
| 362 MRPS9       | 0.313 | 362 RPL39P3       | -0.166 |
| 363 KIAA1143    | 0.313 | 363 MAP2K3        | -0.166 |
| 364 ZNF644      | 0.313 | 364 NPIP4         | -0.166 |
| 365 RBM27       | 0.313 | 365 FAM157C       | -0.166 |
| 366 AC008132.12 | 0.312 | 366 TAF10         | -0.167 |
| 367 CENPH       | 0.312 | 367 RP11.497H16.5 | -0.167 |
| 368 AURKA       | 0.312 | 368 ADCY7         | -0.167 |
| 369 SNX4        | 0.312 | 369 CTC.338M12.7  | -0.167 |
| 370 RBMX        | 0.312 | 370 STAG3L2       | -0.167 |
| 371 HSPD1       | 0.312 | 371 MT.CYB        | -0.167 |
| 372 RPL6        | 0.312 | 372 RP11.164J13.1 | -0.167 |
| 373 RAD18       | 0.311 | 373 TTLL3         | -0.167 |
| 374 HSP90AA1    | 0.311 | 374 B4GALT7       | -0.167 |
| 375 GTF2H2      | 0.311 | 375 ACRC          | -0.167 |
| 376 E2F6        | 0.311 | 376 RPS7P1        | -0.167 |

|                  |       |                   |        |
|------------------|-------|-------------------|--------|
| 377 H2AFZ        | 0.311 | 377 AC138969.4    | -0.167 |
| 378 NOC3L        | 0.311 | 378 NEK8          | -0.167 |
| 379 METTL6       | 0.310 | 379 NMRK1         | -0.167 |
| 380 TBCE         | 0.310 | 380 RP11.556K13.1 | -0.168 |
| 381 CCDC77       | 0.310 | 381 RP4.673M15.1  | -0.168 |
| 382 C2orf44      | 0.309 | 382 RNPS1P1       | -0.168 |
| 383 FXR1         | 0.309 | 383 PKD1P5        | -0.168 |
| 384 CCNA2        | 0.309 | 384 CYB561D1      | -0.168 |
| 385 CNOT6        | 0.309 | 385 TSR3          | -0.168 |
| 386 WDR5         | 0.309 | 386 LRCH4         | -0.168 |
| 387 ERH          | 0.309 | 387 CCDC9         | -0.168 |
| 388 RNF2         | 0.308 | 388 SLC12A6       | -0.168 |
| 389 KIF20A       | 0.308 | 389 RHOT2         | -0.168 |
| 390 RANBP1       | 0.308 | 390 EML3          | -0.168 |
| 391 RPA3         | 0.308 | 391 TPRA1         | -0.169 |
| 392 NUP85        | 0.308 | 392 CCPG1         | -0.169 |
| 393 ACTR6        | 0.308 | 393 CTD.3065B20.  | -0.169 |
| 394 C5orf34      | 0.307 | 394 RP11.567G24.1 | -0.169 |
| 395 GAR1         | 0.307 | 395 ZNF785        | -0.169 |
| 396 MRPL37       | 0.307 | 396 C4B           | -0.169 |
| 397 KIF2C        | 0.307 | 397 RP11.758P17.3 | -0.169 |
| 398 RAD51C       | 0.306 | 398 ANKRD61       | -0.169 |
| 399 BUB1B        | 0.306 | 399 CSAD          | -0.169 |
| 400 CASP8AP2     | 0.306 | 400 BCL3          | -0.169 |
| 401 SASS6        | 0.306 | 401 SLX1B         | -0.169 |
| 402 COX7A2       | 0.306 | 402 RAB40C        | -0.169 |
| 403 BLM          | 0.306 | 403 VPS51         | -0.169 |
| 404 NDUFB6       | 0.306 | 404 ZFYVE27       | -0.169 |
| 405 VMA21        | 0.306 | 405 TLK2P1        | -0.170 |
| 406 PSRC1        | 0.305 | 406 SLC22A20      | -0.170 |
| 407 NLN          | 0.305 | 407 ANP32AP1      | -0.170 |
| 408 NIF3L1       | 0.305 | 408 CTD.3193O13.  | -0.170 |
| 409 CBX3         | 0.305 | 409 RNF213        | -0.170 |
| 410 CDCA2        | 0.305 | 410 RP11.91A18.4  | -0.170 |
| 411 DRG1         | 0.305 | 411 AC018804.6    | -0.171 |
| 412 H3F3A        | 0.305 | 412 ST3GAL1       | -0.171 |
| 413 RP11.212P7.3 | 0.305 | 413 UVSSA         | -0.171 |
| 414 BZW1         | 0.305 | 414 R3HDM4        | -0.171 |
| 415 RPS26        | 0.305 | 415 TUBA4A        | -0.171 |
| 416 FBXO45       | 0.304 | 416 LINC00894     | -0.171 |
| 417 CEBPZ        | 0.304 | 417 CLSTN3        | -0.171 |
| 418 MRPL18       | 0.304 | 418 CLTB          | -0.171 |
| 419 POC1A        | 0.304 | 419 GPR108        | -0.171 |
| 420 NASP         | 0.304 | 420 SLC39A13      | -0.171 |
| 421 RPL39        | 0.304 | 421 RP11.274B21.4 | -0.171 |
| 422 CKS2         | 0.304 | 422 STAT5A        | -0.171 |
| 423 KLHL23       | 0.303 | 423 SEMA4B        | -0.172 |
| 424 C1orf112     | 0.303 | 424 PARP3         | -0.172 |

|     |              |       |     |               |        |
|-----|--------------|-------|-----|---------------|--------|
| 425 | GTF2H3       | 0.303 | 425 | ARRDC1        | -0.172 |
| 426 | NUS1         | 0.303 | 426 | SLC12A4       | -0.172 |
| 427 | MND1         | 0.303 | 427 | DBNL          | -0.172 |
| 428 | PAPOLA       | 0.303 | 428 | PPP1R12B      | -0.172 |
| 429 | PRDX3        | 0.303 | 429 | HLA.E         | -0.172 |
| 430 | STIP1        | 0.302 | 430 | LCAT          | -0.172 |
| 431 | MCM6         | 0.302 | 431 | AC093818.1    | -0.172 |
| 432 | RNGTT        | 0.302 | 432 | RP11.274B21.2 | -0.172 |
| 433 | NUP205       | 0.302 | 433 | INO80B        | -0.172 |
| 434 | DEPDC4       | 0.302 | 434 | AC004057.1    | -0.172 |
| 435 | NOL10        | 0.302 | 435 | AC068580.6    | -0.172 |
| 436 | ATG4C        | 0.302 | 436 | CTC.471F3.4   | -0.172 |
| 437 | EFTUD2       | 0.302 | 437 | GOLGA6L10.1   | -0.173 |
| 438 | DEPDC1B      | 0.301 | 438 | EHD1          | -0.173 |
| 439 | PAIP1        | 0.301 | 439 | AC018738.2    | -0.173 |
| 440 | KLHDC3       | 0.301 | 440 | CLCN7         | -0.173 |
| 441 | DNAJC8       | 0.301 | 441 | TRIM41        | -0.173 |
| 442 | KIF18A       | 0.301 | 442 | AC083873.4    | -0.173 |
| 443 | METAP2       | 0.301 | 443 | C1S           | -0.173 |
| 444 | MKI67IP      | 0.301 | 444 | MAPK13        | -0.174 |
| 445 | SRPK1        | 0.301 | 445 | NPIPA1        | -0.174 |
| 446 | PFDN4        | 0.300 | 446 | MAVS          | -0.174 |
| 447 | KATNBL1      | 0.300 | 447 | ATG2A         | -0.174 |
| 448 | HNRNPA2B1    | 0.300 | 448 | RP11.783K16.1 | -0.174 |
| 449 | LRPPRC       | 0.300 | 449 | RP11.244H3.1  | -0.174 |
| 450 | CSNK2A1      | 0.300 | 450 | GOLGA3        | -0.174 |
| 451 | LRRC58       | 0.300 | 451 | SNRPEP4       | -0.174 |
| 452 | ZNF451       | 0.300 | 452 | AC027612.1    | -0.174 |
| 453 | USP33        | 0.299 | 453 | ZC3H11B       | -0.174 |
| 454 | ZWINT        | 0.299 | 454 | CFLAR         | -0.174 |
| 455 | PRRC2A       | 0.299 | 455 | CCDC159       | -0.175 |
| 456 | RIOK1        | 0.299 | 456 | TPCN1         | -0.175 |
| 457 | TBC1D31      | 0.299 | 457 | AC015849.19   | -0.175 |
| 458 | CENPF        | 0.299 | 458 | CCDC88B       | -0.175 |
| 459 | BCLAF1       | 0.299 | 459 | CCDC130       | -0.175 |
| 460 | OIP5         | 0.299 | 460 | TRIM73        | -0.175 |
| 461 | CENPK        | 0.299 | 461 | ADCK5         | -0.175 |
| 462 | XXbac.BPG252 | 0.299 | 462 | STOML1        | -0.175 |
| 463 | EXOSC2       | 0.299 | 463 | PIGG          | -0.175 |
| 464 | MZT1         | 0.298 | 464 | SCAMP2        | -0.175 |
| 465 | TTC26        | 0.298 | 465 | SLC1A5        | -0.175 |
| 466 | ATP5O        | 0.298 | 466 | GHDC          | -0.176 |
| 467 | ITGB3BP      | 0.298 | 467 | SZT2.AS1      | -0.176 |
| 468 | PHF6         | 0.298 | 468 | CD27.AS1      | -0.176 |
| 469 | NCAPH        | 0.298 | 469 | PDPK2         | -0.176 |
| 470 | HELLS        | 0.297 | 470 | SEC61A1       | -0.176 |
| 471 | UQCR11       | 0.297 | 471 | LRRC37A2      | -0.176 |
| 472 | STXBP4       | 0.297 | 472 | VMAC          | -0.176 |

|                   |       |                   |        |
|-------------------|-------|-------------------|--------|
| 473 LMNB1         | 0.297 | 473 RP11.473M20.1 | -0.176 |
| 474 GBAS          | 0.297 | 474 GOLGA8I       | -0.176 |
| 475 FASTKD3       | 0.296 | 475 AC138035.2    | -0.176 |
| 476 CDC25A        | 0.296 | 476 ZZEF1         | -0.176 |
| 477 ACAT2         | 0.296 | 477 MR1           | -0.176 |
| 478 ATG5          | 0.296 | 478 MPRIP         | -0.176 |
| 479 WDR3          | 0.296 | 479 ABCA7         | -0.177 |
| 480 SYNCRIP       | 0.296 | 480 CCDC57        | -0.177 |
| 481 NELFE         | 0.296 | 481 RP11.408P14.1 | -0.177 |
| 482 SEH1L         | 0.296 | 482 KIAA0556      | -0.177 |
| 483 E2F3          | 0.295 | 483 TSC2          | -0.177 |
| 484 WDHD1         | 0.295 | 484 MGLL          | -0.177 |
| 485 FKBP3         | 0.295 | 485 ARFGAP1       | -0.177 |
| 486 TARDBP        | 0.295 | 486 C1orf63       | -0.177 |
| 487 SMS           | 0.295 | 487 POU2F2        | -0.177 |
| 488 EIF3E         | 0.295 | 488 FAM73B        | -0.177 |
| 489 RP11.5106.1   | 0.294 | 489 KLF13         | -0.177 |
| 490 PUS7          | 0.294 | 490 SPG7          | -0.177 |
| 491 INTS8         | 0.294 | 491 MKLN1.AS1     | -0.177 |
| 492 NCBP1         | 0.294 | 492 NONOP2        | -0.178 |
| 493 TRMT61B       | 0.294 | 493 CAPN15        | -0.178 |
| 494 PSMC6         | 0.294 | 494 LMO7          | -0.178 |
| 495 CENPE         | 0.294 | 495 LTB4R         | -0.178 |
| 496 WDR76         | 0.294 | 496 SNX29         | -0.178 |
| 497 HNRNPR        | 0.294 | 497 ZCCHC6        | -0.178 |
| 498 RP11.552M11.4 | 0.294 | 498 CIITA         | -0.178 |
| 499 PCMT1         | 0.294 | 499 TRIM21        | -0.178 |
| 500 KIF20B        | 0.294 | 500 GLUD1P3       | -0.178 |
| 501 HRSP12        | 0.294 | 501 MST1          | -0.179 |
| 502 RP3.337H4.10  | 0.294 | 502 C11orf35      | -0.179 |
| 503 WDR77         | 0.294 | 503 LINC01001     | -0.179 |
| 504 RPS18         | 0.293 | 504 EIF2AK3       | -0.179 |
| 505 ATP5J         | 0.293 | 505 NUDT18        | -0.179 |
| 506 CENPA         | 0.293 | 506 CAPN3         | -0.179 |
| 507 SMC2          | 0.293 | 507 ESRRA         | -0.179 |
| 508 MRPL35        | 0.293 | 508 SIDT2         | -0.179 |
| 509 ORC6          | 0.292 | 509 PPIAP22       | -0.179 |
| 510 AIDA          | 0.292 | 510 GLUD2         | -0.179 |
| 511 RP11.156E6.1  | 0.292 | 511 RP11.228B15.4 | -0.179 |
| 512 CAND1         | 0.292 | 512 AP1G2         | -0.180 |
| 513 CKAP2         | 0.292 | 513 C4A           | -0.180 |
| 514 MRPL15        | 0.291 | 514 YWHAZP3       | -0.180 |
| 515 ARHGAP11A     | 0.291 | 515 AC098614.2    | -0.180 |
| 516 EXOSC9        | 0.291 | 516 HAGHL         | -0.180 |
| 517 TRA2B         | 0.291 | 517 RP11.66N24.4  | -0.180 |
| 518 SNHG16        | 0.291 | 518 MST1R         | -0.180 |
| 519 KIAA1429      | 0.291 | 519 RP4.717I23.3  | -0.180 |
| 520 C2orf76       | 0.291 | 520 AC135048.13   | -0.180 |

|                  |       |                   |        |
|------------------|-------|-------------------|--------|
| 521 DNAJA1       | 0.291 | 521 RP3.437C15.1  | -0.180 |
| 522 KDM1A        | 0.291 | 522 C20orf24      | -0.181 |
| 523 EXOSC3       | 0.290 | 523 MC1R          | -0.181 |
| 524 RWDD4        | 0.290 | 524 CREBRF        | -0.181 |
| 525 HSPB11       | 0.290 | 525 KHNYN         | -0.181 |
| 526 PPID         | 0.290 | 526 HDAC7         | -0.182 |
| 527 NUPL1        | 0.290 | 527 LINC00174     | -0.182 |
| 528 ECT2         | 0.290 | 528 CCNDBP1       | -0.182 |
| 529 RUVBL1       | 0.290 | 529 PIEZO1        | -0.182 |
| 530 MORF4L1      | 0.290 | 530 WASH4P        | -0.182 |
| 531 RHNO1        | 0.289 | 531 DNASE1L1      | -0.182 |
| 532 VRK1         | 0.289 | 532 PKD1P6        | -0.182 |
| 533 CDC42        | 0.289 | 533 CHKB          | -0.182 |
| 534 PIP5K1A      | 0.289 | 534 RP11.361L15.4 | -0.182 |
| 535 PLK4         | 0.289 | 535 DENND3        | -0.183 |
| 536 RAE1         | 0.289 | 536 MXD1          | -0.183 |
| 537 CCNC         | 0.289 | 537 AC004878.3    | -0.183 |
| 538 CNOT10       | 0.289 | 538 MAN2B2        | -0.183 |
| 539 PPP4R2       | 0.288 | 539 ORAI2         | -0.183 |
| 540 SNRPF        | 0.288 | 540 RP11.512F24.1 | -0.183 |
| 541 SELRC1       | 0.288 | 541 SBF1          | -0.183 |
| 542 MEA1         | 0.288 | 542 PMS2P2        | -0.184 |
| 543 NKIRAS1      | 0.288 | 543 MMP19         | -0.184 |
| 544 BUB1         | 0.288 | 544 CTD.3185P2.1  | -0.184 |
| 545 LACE1        | 0.288 | 545 ARHGAP27      | -0.184 |
| 546 ARMC8        | 0.287 | 546 SMARCA2       | -0.184 |
| 547 FAM161A      | 0.287 | 547 FAM160A2      | -0.184 |
| 548 UBE2V1       | 0.287 | 548 APOL2         | -0.185 |
| 549 PRIMPOL      | 0.287 | 549 DDRGK1        | -0.185 |
| 550 HAUS2        | 0.287 | 550 PRELID1P1     | -0.185 |
| 551 ECD          | 0.286 | 551 TMEM214       | -0.185 |
| 552 HMGXB4       | 0.286 | 552 GS1.44D20.1   | -0.185 |
| 553 PPP6C        | 0.286 | 553 ANKRD11       | -0.186 |
| 554 TOMM20       | 0.286 | 554 MYD88         | -0.186 |
| 555 TEFM         | 0.286 | 555 TFEB          | -0.186 |
| 556 PHF5A        | 0.286 | 556 ATF4P3        | -0.186 |
| 557 WRNIP1       | 0.286 | 557 RP3.508I15.14 | -0.186 |
| 558 HACE1        | 0.286 | 558 NPIP3         | -0.186 |
| 559 ORC1         | 0.286 | 559 EPS8L2        | -0.186 |
| 560 CENPO        | 0.286 | 560 AC010468.1    | -0.186 |
| 561 LYRM2        | 0.286 | 561 CHPF          | -0.186 |
| 562 RP11.118M9.3 | 0.286 | 562 RP11.274B21.3 | -0.186 |
| 563 YTHDF2       | 0.286 | 563 IRF3          | -0.186 |
| 564 KATNA1       | 0.285 | 564 SPDYE2B       | -0.187 |
| 565 NDUFB5       | 0.285 | 565 SLC16A3       | -0.187 |
| 566 TSN          | 0.285 | 566 GLRX          | -0.187 |
| 567 PPIL4        | 0.284 | 567 GRN           | -0.187 |
| 568 SLIRP        | 0.284 | 568 PKD1P1        | -0.187 |

|                   |       |                  |        |
|-------------------|-------|------------------|--------|
| 569 DHX57         | 0.284 | 569 NPM1P27      | -0.187 |
| 570 PRPF40A       | 0.284 | 570 PPARA        | -0.187 |
| 571 RP11.10N23.4  | 0.284 | 571 C1DP1        | -0.187 |
| 572 GMFB          | 0.284 | 572 AC002310.7   | -0.188 |
| 573 ERI3          | 0.284 | 573 ZNF598       | -0.188 |
| 574 TRIM37        | 0.283 | 574 GS1.124K5.11 | -0.188 |
| 575 EMG1          | 0.283 | 575 COMTD1       | -0.188 |
| 576 PTPLAD1       | 0.283 | 576 NUDT22       | -0.188 |
| 577 PSMA1         | 0.283 | 577 RP11.894P9.1 | -0.188 |
| 578 RPS3A         | 0.283 | 578 CNPPD1       | -0.189 |
| 579 COPS4         | 0.283 | 579 ORAI3        | -0.189 |
| 580 TIPRL         | 0.283 | 580 PPP1R15A     | -0.189 |
| 581 MAP6D1        | 0.283 | 581 ERAP2        | -0.189 |
| 582 LZIC          | 0.283 | 582 RAB4B        | -0.189 |
| 583 L2HGDH        | 0.283 | 583 STK10        | -0.189 |
| 584 BANF1         | 0.283 | 584 ARFRP1       | -0.190 |
| 585 DIMT1         | 0.283 | 585 LENG8.AS1    | -0.190 |
| 586 KIF14         | 0.283 | 586 RP13.996F3.5 | -0.190 |
| 587 ZNF473        | 0.283 | 587 AKAP13       | -0.190 |
| 588 SKIV2L2       | 0.282 | 588 BET1L        | -0.190 |
| 589 ZFP1          | 0.282 | 589 GMIP         | -0.190 |
| 590 DCTN4         | 0.282 | 590 TMEM127      | -0.190 |
| 591 CDK4          | 0.282 | 591 EIF1AXP1     | -0.191 |
| 592 IPO9          | 0.282 | 592 FTLP3        | -0.191 |
| 593 TMEM183A      | 0.282 | 593 TMEM8A       | -0.191 |
| 594 GEMIN2        | 0.282 | 594 AC005822.1   | -0.191 |
| 595 ZNF143        | 0.282 | 595 NABP1        | -0.191 |
| 596 CNOT7         | 0.282 | 596 FAM214A      | -0.191 |
| 597 NAA50         | 0.282 | 597 TGFBR2       | -0.191 |
| 598 RNF5          | 0.281 | 598 ARAP1.AS1    | -0.191 |
| 599 RNASEH2A      | 0.281 | 599 SDF4         | -0.191 |
| 600 CHCHD4        | 0.281 | 600 AC011737.2   | -0.191 |
| 601 AC104655.2    | 0.281 | 601 RPL4P5       | -0.191 |
| 602 YWHAE         | 0.281 | 602 TRIM66       | -0.191 |
| 603 AC000068.10   | 0.280 | 603 RP11.641D5.1 | -0.191 |
| 604 GXYLT1        | 0.280 | 604 CD74         | -0.192 |
| 605 ZMYM4         | 0.280 | 605 WDR24        | -0.192 |
| 606 PRR11         | 0.280 | 606 TPGS1        | -0.192 |
| 607 LYRM4         | 0.280 | 607 GET4         | -0.192 |
| 608 MTFR2         | 0.280 | 608 HLA.B        | -0.192 |
| 609 GTF2H2B       | 0.280 | 609 RP11.84G21.1 | -0.192 |
| 610 RP11.677I18.3 | 0.280 | 610 RHBDL1       | -0.192 |
| 611 AC007390.5    | 0.280 | 611 SQRDL        | -0.192 |
| 612 FKBP4         | 0.280 | 612 ENTHD2       | -0.192 |
| 613 RPL23A        | 0.280 | 613 ABHD17AP1    | -0.192 |
| 614 YEATS4        | 0.280 | 614 RELB         | -0.192 |
| 615 LARP4         | 0.279 | 615 PCNXL2       | -0.193 |
| 616 PSMD11        | 0.279 | 616 CBX4         | -0.193 |

|                   |       |                   |        |
|-------------------|-------|-------------------|--------|
| 617 ORC5          | 0.279 | 617 RP5.1050D4.3  | -0.193 |
| 618 POLR3F        | 0.279 | 618 EIF2S2P4      | -0.193 |
| 619 NUDT21        | 0.279 | 619 CAMTA2        | -0.193 |
| 620 NUP93         | 0.279 | 620 ACAP3         | -0.194 |
| 621 PSMB4         | 0.279 | 621 CTC.250I14.6  | -0.194 |
| 622 MED17         | 0.279 | 622 MT.CO2        | -0.194 |
| 623 NUP133        | 0.279 | 623 RP11.489E7.4  | -0.194 |
| 624 LRR1          | 0.278 | 624 TRAF1         | -0.194 |
| 625 DPM1          | 0.278 | 625 KLC1          | -0.194 |
| 626 ZCCHC17       | 0.278 | 626 SMG1P1        | -0.194 |
| 627 CDC26         | 0.278 | 627 DNHD1         | -0.195 |
| 628 CCDC117       | 0.278 | 628 RP11.20O24.4  | -0.195 |
| 629 ZYG11B        | 0.278 | 629 STX4          | -0.195 |
| 630 CPSF3         | 0.278 | 630 TNFAIP3       | -0.195 |
| 631 GNL3          | 0.278 | 631 DHRS1         | -0.195 |
| 632 DDX50         | 0.278 | 632 LINC00893     | -0.196 |
| 633 DBR1          | 0.278 | 633 HEXDC         | -0.196 |
| 634 YWHAQ         | 0.278 | 634 TBC1D17       | -0.196 |
| 635 PRC1          | 0.278 | 635 LINC00672     | -0.196 |
| 636 SAAL1         | 0.278 | 636 NOL3          | -0.196 |
| 637 MORN2         | 0.278 | 637 CDK10         | -0.197 |
| 638 MEX3A         | 0.278 | 638 SLX1B.SULT1   | -0.197 |
| 639 ENY2          | 0.278 | 639 SERINC3       | -0.197 |
| 640 CCDC59        | 0.278 | 640 LA16c.390E6.5 | -0.197 |
| 641 ZNHIT3        | 0.278 | 641 DTX2          | -0.197 |
| 642 RP11.312J18.5 | 0.278 | 642 CES2          | -0.197 |
| 643 CDKN3         | 0.278 | 643 PEX16         | -0.198 |
| 644 SRSF7         | 0.277 | 644 FBRS          | -0.198 |
| 645 PWP1          | 0.277 | 645 RP11.3P17.3   | -0.198 |
| 646 WARS2         | 0.277 | 646 SULT1A3       | -0.198 |
| 647 RPS7          | 0.277 | 647 RABAC1        | -0.198 |
| 648 TBCA          | 0.276 | 648 GSDMB         | -0.198 |
| 649 FANCI         | 0.276 | 649 CTB.31O20.4   | -0.198 |
| 650 TAF5          | 0.276 | 650 ISG20         | -0.199 |
| 651 USP14         | 0.276 | 651 RPL14P1       | -0.199 |
| 652 RARS2         | 0.276 | 652 MPG           | -0.199 |
| 653 PAIP2         | 0.276 | 653 ARHGEF1       | -0.199 |
| 654 GTF2H5        | 0.276 | 654 RP11.587D21.1 | -0.199 |
| 655 ADSL          | 0.276 | 655 TMEM198B      | -0.200 |
| 656 G3BP1         | 0.276 | 656 CSNK2A3       | -0.200 |
| 657 CLSPN         | 0.276 | 657 RRN3P3        | -0.200 |
| 658 WBP11         | 0.276 | 658 ENSAP2        | -0.200 |
| 659 RAD54L        | 0.276 | 659 ADAM8         | -0.200 |
| 660 RP11.360L9.4  | 0.275 | 660 NR1H2         | -0.201 |
| 661 POLB          | 0.275 | 661 MT.CO1        | -0.201 |
| 662 THUMPD3       | 0.275 | 662 GAK           | -0.201 |
| 663 NDUFC1        | 0.275 | 663 MIR1282       | -0.201 |
| 664 CDCA7         | 0.275 | 664 RPL41P1       | -0.201 |



|                   |       |                   |        |
|-------------------|-------|-------------------|--------|
| 665 RP4.785G19.5  | 0.275 | 665 CPEB2         | -0.202 |
| 666 PSMB2         | 0.275 | 666 PMS2P3        | -0.202 |
| 667 HNRNPAB       | 0.275 | 667 CTGLF11P      | -0.202 |
| 668 CAPN7         | 0.275 | 668 EIF4BP6       | -0.202 |
| 669 LARS          | 0.275 | 669 HNRNPA1P48    | -0.203 |
| 670 SMC4          | 0.274 | 670 OGFOD2        | -0.203 |
| 671 SSBP1         | 0.274 | 671 SH2B1         | -0.203 |
| 672 NFU1          | 0.274 | 672 RP11.203F10.6 | -0.203 |
| 673 SPRTN         | 0.274 | 673 PLK3          | -0.203 |
| 674 CDC40         | 0.274 | 674 RP11.632C17_  | -0.204 |
| 675 STRAP         | 0.274 | 675 RPL7AP30      | -0.204 |
| 676 CDC45         | 0.274 | 676 RP11.47A8.5   | -0.204 |
| 677 CAMTA1        | 0.274 | 677 RP11.108K14.4 | -0.204 |
| 678 POLR2D        | 0.274 | 678 YBX1P1        | -0.204 |
| 679 CHCHD1        | 0.274 | 679 SIRT7         | -0.204 |
| 680 CDCA3         | 0.274 | 680 LPXN          | -0.205 |
| 681 SMARCC1       | 0.274 | 681 NIPAL3        | -0.205 |
| 682 MTCH2         | 0.274 | 682 ANKMY1        | -0.205 |
| 683 SAE1          | 0.274 | 683 TNIP1         | -0.205 |
| 684 RAD21         | 0.274 | 684 PDLIM1        | -0.205 |
| 685 UTP15         | 0.274 | 685 PHYKPL        | -0.205 |
| 686 ERCC8         | 0.274 | 686 SLX1A.SULT1   | -0.206 |
| 687 DENND6A       | 0.273 | 687 AC138783.12   | -0.206 |
| 688 MRPL11        | 0.273 | 688 FTH1P10       | -0.206 |
| 689 THOC1         | 0.273 | 689 SPRYD3        | -0.206 |
| 690 FANCC         | 0.273 | 690 RP11.574K11.2 | -0.206 |
| 691 MRPS28        | 0.273 | 691 UBALD1        | -0.206 |
| 692 RPP30         | 0.272 | 692 MINK1         | -0.206 |
| 693 RP4.635E18.6  | 0.272 | 693 CTD.2139B15.1 | -0.206 |
| 694 MRPS27        | 0.272 | 694 RP11.395P17.3 | -0.206 |
| 695 HSPA14        | 0.272 | 695 APOL6         | -0.206 |
| 696 ERI1          | 0.272 | 696 STAT6         | -0.207 |
| 697 RP11.269F19.2 | 0.272 | 697 SERBP1P5      | -0.207 |
| 698 GNG5          | 0.272 | 698 CDC42P6       | -0.207 |
| 699 CUL3          | 0.272 | 699 TXNIP         | -0.207 |
| 700 ZNF367        | 0.272 | 700 TCP11L2       | -0.207 |
| 701 KBTBD6        | 0.272 | 701 BLCAP         | -0.208 |
| 702 AHCY          | 0.271 | 702 VPS9D1        | -0.208 |
| 703 NDUFA8        | 0.271 | 703 TICAM1        | -0.208 |
| 704 XPO7          | 0.271 | 704 CYP3A5        | -0.208 |
| 705 BIRC5         | 0.271 | 705 C19orf10      | -0.208 |
| 706 PCNA          | 0.271 | 706 ST13P4        | -0.209 |
| 707 DDX18         | 0.271 | 707 RAD51.AS1     | -0.209 |
| 708 BOLA3         | 0.270 | 708 RP5.857K21.7  | -0.209 |
| 709 GTF2H4        | 0.270 | 709 JUNB          | -0.210 |
| 710 RAN           | 0.270 | 710 RP11.324H6.5  | -0.210 |
| 711 RNF138        | 0.270 | 711 ALDH3B1       | -0.210 |
| 712 SNX3          | 0.270 | 712 ZNF276        | -0.210 |

|                  |       |                   |        |
|------------------|-------|-------------------|--------|
| 713 RPL24        | 0.270 | 713 RPS7P11       | -0.211 |
| 714 NUDT15       | 0.270 | 714 FAUP1         | -0.211 |
| 715 RAD1         | 0.270 | 715 TBC1D22A      | -0.211 |
| 716 PSMA5        | 0.270 | 716 TPI1P1        | -0.211 |
| 717 NCAPG2       | 0.269 | 717 MAN2C1        | -0.211 |
| 718 C5orf22      | 0.269 | 718 RPL21P28      | -0.212 |
| 719 C17orf58     | 0.269 | 719 AMPD3         | -0.212 |
| 720 POLR1E       | 0.269 | 720 RP11.9L18.2   | -0.212 |
| 721 NEK4         | 0.269 | 721 NPIPA2        | -0.212 |
| 722 CTB.131K11.1 | 0.269 | 722 CYB561A3      | -0.212 |
| 723 PDRG1        | 0.269 | 723 GTF2IRD2P1    | -0.212 |
| 724 SGOL1.AS1    | 0.269 | 724 RPL12P4       | -0.212 |
| 725 TUBA1B       | 0.269 | 725 MT.ND5        | -0.212 |
| 726 THAP1        | 0.269 | 726 DYNC1I2P1     | -0.212 |
| 727 FANCE        | 0.269 | 727 AC016734.2    | -0.213 |
| 728 PSIP1        | 0.268 | 728 ARHGAP1       | -0.213 |
| 729 FAM136A      | 0.268 | 729 PSD4          | -0.214 |
| 730 ANKRD18EP    | 0.268 | 730 ERN1          | -0.214 |
| 731 XXbac.BPG300 | 0.268 | 731 CYBA          | -0.214 |
| 732 RIF1         | 0.268 | 732 TRIM8         | -0.214 |
| 733 MCM8         | 0.268 | 733 FBXW5         | -0.214 |
| 734 MRPS18B      | 0.268 | 734 RP11.958N24.1 | -0.215 |
| 735 CCDC121      | 0.268 | 735 ZDHHC24       | -0.216 |
| 736 BRMS1L       | 0.268 | 736 RP11.819M15.  | -0.216 |
| 737 NDUFA6       | 0.268 | 737 RP4.592A1.2   | -0.216 |
| 738 SMN2         | 0.268 | 738 RP11.23N2.4   | -0.217 |
| 739 SPAST        | 0.267 | 739 RP11.1212A22  | -0.217 |
| 740 CSDE1        | 0.267 | 740 SEL1L         | -0.217 |
| 741 QTRTD1       | 0.267 | 741 MYO18A        | -0.217 |
| 742 ZC3HC1       | 0.267 | 742 SZT2          | -0.218 |
| 743 SNRPA1       | 0.267 | 743 MGAT1         | -0.218 |
| 744 TMEM126A     | 0.267 | 744 RP11.466H18.1 | -0.218 |
| 745 PSMA3        | 0.267 | 745 NDUFV2P1      | -0.218 |
| 746 ALG6         | 0.267 | 746 IL20RB        | -0.218 |
| 747 ANAPC7       | 0.267 | 747 RP11.64B16.2  | -0.218 |
| 748 DAXX         | 0.266 | 748 EEF1A1P12     | -0.218 |
| 749 PSMB7        | 0.266 | 749 HOOK2         | -0.218 |
| 750 HMGN1        | 0.266 | 750 RP11.46D6.1   | -0.218 |
| 751 NDUFAF4      | 0.266 | 751 EIF4BP3       | -0.219 |
| 752 ADAM11       | 0.266 | 752 AHSA2         | -0.219 |
| 753 SDHC         | 0.266 | 753 POLR2J3       | -0.219 |
| 754 ISOC1        | 0.266 | 754 SLC35C1       | -0.219 |
| 755 RPS6KB1      | 0.266 | 755 IKBKGP1       | -0.219 |
| 756 HNRNPU       | 0.266 | 756 RP11.730G20.2 | -0.219 |
| 757 MTHFD1       | 0.266 | 757 TRAPPC12      | -0.220 |
| 758 LYPLA1       | 0.265 | 758 RP11.1212A22  | -0.220 |
| 759 METTL10      | 0.265 | 759 DGKZP1        | -0.220 |
| 760 ATP5G1       | 0.265 | 760 MKNK2         | -0.220 |

|                   |       |                   |        |
|-------------------|-------|-------------------|--------|
| 761 GOLGA7        | 0.265 | 761 PPIAP29       | -0.220 |
| 762 IMMT          | 0.265 | 762 SUN2          | -0.221 |
| 763 MCM4          | 0.265 | 763 CTD.2047H16.  | -0.221 |
| 764 ARL5A         | 0.265 | 764 ZBTB7A        | -0.221 |
| 765 BARD1         | 0.265 | 765 RP11.567I13.1 | -0.221 |
| 766 SRFBP1        | 0.265 | 766 RPL9P8        | -0.221 |
| 767 RCN2          | 0.265 | 767 RP13.996F3.4  | -0.221 |
| 768 IPO5          | 0.265 | 768 EIF4HP1       | -0.222 |
| 769 DNM1L         | 0.265 | 769 D2HGDH        | -0.222 |
| 770 CSTF3         | 0.264 | 770 AC027601.1    | -0.222 |
| 771 ZNF670        | 0.264 | 771 MON1B         | -0.222 |
| 772 CTPS1         | 0.264 | 772 RP11.571M6.7  | -0.223 |
| 773 SNRPD3        | 0.264 | 773 RPL21P39      | -0.223 |
| 774 FANCG         | 0.264 | 774 NR1D1         | -0.223 |
| 775 GTPBP8        | 0.264 | 775 WASH2P        | -0.223 |
| 776 UTP20         | 0.264 | 776 RPS26P47      | -0.223 |
| 777 COA6          | 0.264 | 777 HERPUD1       | -0.224 |
| 778 CDK2          | 0.264 | 778 TOM1          | -0.224 |
| 779 PRC1.AS1      | 0.264 | 779 AGAP9         | -0.224 |
| 780 COMMD2        | 0.263 | 780 PRKD2         | -0.224 |
| 781 ZNF2          | 0.263 | 781 PPP1R14BP3    | -0.224 |
| 782 GINS3         | 0.263 | 782 DGKA          | -0.225 |
| 783 RP11.32B11.2  | 0.263 | 783 RPL7AP66      | -0.225 |
| 784 MOB1A         | 0.263 | 784 DNAJC4        | -0.225 |
| 785 CENPN         | 0.263 | 785 RP3.508I15.19 | -0.225 |
| 786 XRCC2         | 0.263 | 786 RP11.449P15.2 | -0.225 |
| 787 ANAPC10       | 0.263 | 787 PDCL3P4       | -0.225 |
| 788 TMEM106C      | 0.263 | 788 ERAP1         | -0.226 |
| 789 RMND1         | 0.263 | 789 SBNO2         | -0.226 |
| 790 SENP6         | 0.263 | 790 TBC1D3F       | -0.226 |
| 791 KPNA3         | 0.263 | 791 NEAT1         | -0.226 |
| 792 SMU1          | 0.263 | 792 LA16c.366D1.3 | -0.227 |
| 793 GTF2A2        | 0.263 | 793 RP4.706A16.3  | -0.227 |
| 794 CDC20         | 0.262 | 794 RP5.1142A6.2  | -0.227 |
| 795 DHFRP1        | 0.262 | 795 AQP3          | -0.227 |
| 796 RP4.816N1.7   | 0.262 | 796 UNKL          | -0.229 |
| 797 NDRG3         | 0.262 | 797 TCIRG1        | -0.229 |
| 798 RP11.804A23.2 | 0.262 | 798 MIR611        | -0.229 |
| 799 ZFYVE20       | 0.262 | 799 C16orf58      | -0.230 |
| 800 PNPT1         | 0.262 | 800 MZF1          | -0.230 |
| 801 PAFAH1B3      | 0.262 | 801 RP11.452L6.5  | -0.230 |
| 802 METTL2B       | 0.262 | 802 EEF1A1P19     | -0.231 |
| 803 SMN1          | 0.261 | 803 SLX1A         | -0.231 |
| 804 PMS1          | 0.261 | 804 RP11.122K13.1 | -0.231 |
| 805 UMPS          | 0.261 | 805 ZC3H12A       | -0.231 |
| 806 UHRF1BP1      | 0.261 | 806 BRD7P2        | -0.232 |
| 807 MSH6          | 0.261 | 807 AC093724.2    | -0.232 |
| 808 HNRNPH3       | 0.261 | 808 SPPL2B        | -0.232 |

|                   |       |                   |        |
|-------------------|-------|-------------------|--------|
| 809 ATG10         | 0.261 | 809 EEF1A1P11     | -0.232 |
| 810 RWDD1         | 0.261 | 810 AC017116.11   | -0.232 |
| 811 MUT           | 0.261 | 811 AGAP5         | -0.232 |
| 812 JPX           | 0.261 | 812 STIM1         | -0.232 |
| 813 TLK2          | 0.261 | 813 CTB.54D4.1    | -0.232 |
| 814 DNTTIP2       | 0.261 | 814 EIF3FP3       | -0.232 |
| 815 PRDX6         | 0.261 | 815 ZNF865        | -0.232 |
| 816 RPS27         | 0.261 | 816 AC093106.7    | -0.233 |
| 817 ENOPH1        | 0.261 | 817 AC079250.1    | -0.233 |
| 818 HMMR          | 0.261 | 818 ADPGK.AS1     | -0.233 |
| 819 RP11.386G11.1 | 0.261 | 819 MEF2D         | -0.233 |
| 820 CHEK2         | 0.261 | 820 CTC.575D19.1  | -0.234 |
| 821 RP11.265N6.2  | 0.260 | 821 FTH1P8        | -0.234 |
| 822 RBBP4         | 0.260 | 822 NFKBIZ        | -0.234 |
| 823 SMNDC1        | 0.260 | 823 OS9           | -0.234 |
| 824 ZNF280C       | 0.260 | 824 PKD1          | -0.235 |
| 825 RPA1          | 0.260 | 825 RP11.3P17.4   | -0.235 |
| 826 RIOK2         | 0.260 | 826 C7orf43       | -0.235 |
| 827 UBE3D         | 0.260 | 827 STAT2         | -0.236 |
| 828 ARL6IP6       | 0.260 | 828 ARSA          | -0.236 |
| 829 DGUOK         | 0.260 | 829 ERCC5         | -0.237 |
| 830 EXOSC8        | 0.259 | 830 RP11.448G15.3 | -0.237 |
| 831 URI1          | 0.259 | 831 GOLGA6L3      | -0.238 |
| 832 DPH5          | 0.259 | 832 PSMB8         | -0.238 |
| 833 TRMT5         | 0.259 | 833 B2M           | -0.238 |
| 834 PEX3          | 0.259 | 834 RP11.75L1.2   | -0.238 |
| 835 TOMM70A       | 0.259 | 835 SDCBP2        | -0.238 |
| 836 CTD.2410N18.4 | 0.259 | 836 RP11.395B7.7  | -0.238 |
| 837 KIAA1586      | 0.259 | 837 hsa.mir.6723  | -0.238 |
| 838 ESF1          | 0.259 | 838 RP11.796E2.4  | -0.238 |
| 839 SUPT16H       | 0.259 | 839 FAM3C2        | -0.239 |
| 840 NAA25         | 0.259 | 840 ABTB1         | -0.239 |
| 841 CHCHD3        | 0.259 | 841 UBXN6         | -0.239 |
| 842 RBBP7         | 0.259 | 842 FLYWCH1       | -0.239 |
| 843 C12orf4       | 0.259 | 843 NPIPA8        | -0.240 |
| 844 SUZ12         | 0.259 | 844 LPCAT4        | -0.240 |
| 845 WDR12         | 0.258 | 845 RP11.517A5.4  | -0.241 |
| 846 ABT1          | 0.258 | 846 TUBGCP6       | -0.242 |
| 847 MRPS18A       | 0.258 | 847 CALCOCO1      | -0.242 |
| 848 DLEU2         | 0.258 | 848 LENG8         | -0.242 |
| 849 SNRNP27       | 0.258 | 849 RPL18AP3      | -0.242 |
| 850 TAF9          | 0.258 | 850 CTD.2015B23.1 | -0.242 |
| 851 FAM49B        | 0.258 | 851 TMSB4XP8      | -0.242 |
| 852 ACAT1         | 0.258 | 852 RP11.158M2.3  | -0.243 |
| 853 SPATA5        | 0.257 | 853 RP11.393I23.2 | -0.243 |
| 854 KIAA1191      | 0.257 | 854 RPL13AP20     | -0.245 |
| 855 COPS3         | 0.257 | 855 C19orf60      | -0.245 |
| 856 COX11         | 0.257 | 856 JMJD8         | -0.245 |

|                   |       |                   |        |
|-------------------|-------|-------------------|--------|
| 857 C6orf211      | 0.257 | 857 WHAMM         | -0.245 |
| 858 RRP1B         | 0.257 | 858 AC137934.1    | -0.246 |
| 859 RTN4IP1       | 0.257 | 859 SLC9A8        | -0.246 |
| 860 SMIM11        | 0.257 | 860 COX6A1P2      | -0.246 |
| 861 PIGW          | 0.257 | 861 ZNF688        | -0.247 |
| 862 U2SURP        | 0.257 | 862 FKBP11        | -0.248 |
| 863 TRUB1         | 0.257 | 863 RPLP0P6       | -0.248 |
| 864 ZNF639        | 0.257 | 864 CTD.2260A17.  | -0.248 |
| 865 TRAIP         | 0.256 | 865 RPS26P3       | -0.248 |
| 866 SLBP          | 0.256 | 866 YPEL3         | -0.248 |
| 867 C1QBP         | 0.256 | 867 GTF2IRD2      | -0.248 |
| 868 TMEM194A      | 0.256 | 868 TOLLIP        | -0.249 |
| 869 SMARCA5       | 0.256 | 869 IKBKG         | -0.249 |
| 870 CS            | 0.256 | 870 MIB2          | -0.249 |
| 871 DTYMK         | 0.256 | 871 GDI2P2        | -0.249 |
| 872 RP11.203B9.4  | 0.256 | 872 RP11.66N24.3  | -0.249 |
| 873 HNRNPD        | 0.256 | 873 TEP1          | -0.251 |
| 874 NUP188        | 0.256 | 874 TMEM175       | -0.251 |
| 875 CTD.2555O16.2 | 0.256 | 875 CTD.2287O16.  | -0.251 |
| 876 MAPRE1        | 0.255 | 876 CTD.2192J16.1 | -0.251 |
| 877 RARS          | 0.255 | 877 RP11.592N21.1 | -0.251 |
| 878 BRCA1         | 0.255 | 878 RPS11P5       | -0.251 |
| 879 TATDN1        | 0.255 | 879 PDIA3P        | -0.252 |
| 880               | 0.255 | 880 TECRP1        | -0.252 |
| 881 FEN1          | 0.255 | 881 RN7SL4P       | -0.252 |
| 882 CUL5          | 0.255 | 882 DNAH1         | -0.253 |
| 883 ZNF184        | 0.255 | 883 TYMP          | -0.253 |
| 884 TFB2M         | 0.255 | 884 EME2          | -0.253 |
| 885 DNAJC7        | 0.255 | 885 PML           | -0.253 |
| 886 RPL7          | 0.255 | 886 CHPF2         | -0.254 |
| 887 GABPA         | 0.255 | 887 ST13P15       | -0.255 |
| 888 DDX46         | 0.255 | 888 AP003419.11   | -0.256 |
| 889 C2orf47       | 0.254 | 889 RAC1P2        | -0.256 |
| 890 RNF219        | 0.254 | 890 RABEP2        | -0.256 |
| 891 NKAP          | 0.254 | 891 UBA7          | -0.256 |
| 892 CTB.96E2.7    | 0.254 | 892 RP11.543P15.1 | -0.256 |
| 893 RPSA          | 0.254 | 893 RP11.304L19.4 | -0.257 |
| 894 C12orf29      | 0.254 | 894 SPSB3         | -0.257 |
| 895 NOP58         | 0.254 | 895 CDIPT         | -0.258 |
| 896 NONO          | 0.254 | 896 RNPEPL1       | -0.258 |
| 897 GNL2          | 0.254 | 897 NADSYN1       | -0.258 |
| 898 ELP6          | 0.253 | 898 FBXL15        | -0.258 |
| 899 MAPK9         | 0.253 | 899 RP11.386M24.4 | -0.259 |
| 900 UBE2C         | 0.253 | 900 POLD4         | -0.259 |
| 901 TIMM17A       | 0.253 | 901 EHBP1L1       | -0.259 |
| 902 ZNF627        | 0.253 | 902 MVP           | -0.259 |
| 903 CEP76         | 0.253 | 903 RP11.175B9.3  | -0.259 |
| 904 PSMB6         | 0.253 | 904 PTK2B         | -0.261 |

|                  |       |                   |        |
|------------------|-------|-------------------|--------|
| 905 NUP88        | 0.253 | 905 ST13P6        | -0.261 |
| 906 SIRT1        | 0.253 | 906 RP11.3P17.5   | -0.261 |
| 907 RP4.694A7.2  | 0.252 | 907 RP11.286H14.4 | -0.261 |
| 908 RPL10AP6     | 0.252 | 908 IRF1          | -0.263 |
| 909 KRR1         | 0.252 | 909 PIK3IP1       | -0.263 |
| 910 MRPL45       | 0.252 | 910 AC007238.1    | -0.263 |
| 911 GTPBP4       | 0.252 | 911 UPF3AP1       | -0.264 |
| 912 SNRPB2       | 0.252 | 912 ST13P19       | -0.264 |
| 913 CHAC2        | 0.252 | 913 NPIPA3        | -0.264 |
| 914 CASC5        | 0.252 | 914 ARMC5         | -0.264 |
| 915 SPG21        | 0.252 | 915 TXNDC11       | -0.265 |
| 916 RHOT1        | 0.252 | 916 AP006621.8    | -0.267 |
| 917 DCUN1D1      | 0.252 | 917 HIST2H4A      | -0.267 |
| 918 API5         | 0.252 | 918 AP5Z1         | -0.267 |
| 919 TBC1D22B     | 0.252 | 919 MROH1         | -0.267 |
| 920 UTP6         | 0.252 | 920 RBCK1         | -0.267 |
| 921 GDI2         | 0.251 | 921 PPP1R12C      | -0.267 |
| 922 GRPEL1       | 0.251 | 922 RPL3P4        | -0.267 |
| 923 C8orf59      | 0.251 | 923 RP11.742N3.1  | -0.268 |
| 924 ZC3H15       | 0.251 | 924 NOMO2         | -0.269 |
| 925 TTC21B       | 0.251 | 925 PNPLA2        | -0.269 |
| 926 RP11.345J4.5 | 0.251 | 926 RPS26P8       | -0.269 |
| 927 PHB          | 0.251 | 927 FTH1P23       | -0.270 |
| 928 SERF1B       | 0.251 | 928 RP11.166B2.1  | -0.270 |
| 929 TOPBP1       | 0.251 | 929 RP11.50D9.1   | -0.271 |
| 930 TBCC         | 0.251 | 930 RPL7AP11      | -0.271 |
| 931 FAM35A       | 0.251 | 931 RP3.417G15.1  | -0.272 |
| 932 CDCA8        | 0.251 | 932 RP11.168J18.6 | -0.272 |
| 933 CCBL2        | 0.251 | 933 RP11.16F15.2  | -0.272 |
| 934 GGCT         | 0.250 | 934 KIAA0247      | -0.272 |
| 935 BAG6         | 0.250 | 935 AC092155.1    | -0.273 |
| 936 CWF19L1      | 0.250 | 936 GS1.184P14.2  | -0.273 |
| 937 CYCS         | 0.250 | 937 NLRC5         | -0.273 |
| 938 GPSM2        | 0.250 | 938 RPL21P119     | -0.274 |
| 939 VPS26A       | 0.250 | 939 RP11.475C16.1 | -0.274 |
| 940 SKA1         | 0.250 | 940 ARAP1         | -0.274 |
| 941 CSTF2        | 0.250 | 941 AC022431.1    | -0.276 |
| 942 RP5.867C24.5 | 0.250 | 942 OSBPL7        | -0.277 |
| 943 KPNA4        | 0.250 | 943 UPF3AP2       | -0.277 |
| 944 TYMS         | 0.250 | 944 YIPF2         | -0.277 |
| 945 FAM210A      | 0.250 | 945 C5orf56       | -0.279 |
| 946 DHX29        | 0.250 | 946 RPL13AP5      | -0.280 |
| 947 MRPL1        | 0.250 | 947 CTD.2031P19.4 | -0.280 |
| 948 OPA1         | 0.250 | 948 EEF1B2P3      | -0.281 |
| 949 DHX36        | 0.250 | 949 RP11.761N21.2 | -0.281 |
| 950 ACAD9        | 0.250 | 950 AC093734.1    | -0.281 |
| 951 ALMS1        | 0.250 | 951 SYVN1         | -0.283 |
| 952 ZNF271       | 0.250 | 952 TMEM259       | -0.283 |

|                   |       |                   |        |
|-------------------|-------|-------------------|--------|
| 953 RBM18         | 0.250 | 953 LINC00957     | -0.284 |
| 954 KPNA5         | 0.249 | 954 PLEKHM1P      | -0.286 |
| 955 SRBD1         | 0.249 | 955 SLC38A10      | -0.288 |
| 956 DDX31         | 0.249 | 956 MAFK          | -0.290 |
| 957 HMGN2         | 0.249 | 957 AC116366.6    | -0.290 |
| 958 ZNF326        | 0.249 | 958 MAP1LC3B2     | -0.291 |
| 959 RP11.697E22.2 | 0.249 | 959 ZFP36         | -0.292 |
| 960 UBE2L3        | 0.249 | 960 RASA4B        | -0.293 |
| 961 UTP23         | 0.249 | 961 LRP10         | -0.293 |
| 962 TBPL1         | 0.249 | 962 MT.ND6        | -0.294 |
| 963 CHEK1         | 0.249 | 963 FTH1P2        | -0.296 |
| 964 CRYZL1        | 0.249 | 964 AP000936.1    | -0.298 |
| 965 FANCL         | 0.249 | 965 PCSK7         | -0.299 |
| 966 HMGN4         | 0.249 | 966 TBC1D3C       | -0.301 |
| 967 NCL           | 0.248 | 967 ARAP1.AS2     | -0.303 |
| 968 RPL15         | 0.248 | 968 C1orf132      | -0.303 |
| 969 RP11.650L12.2 | 0.248 | 969 AC107983.4    | -0.303 |
| 970 GINS2         | 0.248 | 970 TTC7A         | -0.303 |
| 971 GAPVD1        | 0.248 | 971 PARP10        | -0.304 |
| 972 RPL22         | 0.248 | 972 RPL13AP7      | -0.304 |
| 973 EIF2B3        | 0.248 | 973 RP11.514P8.8  | -0.305 |
| 974 AZIN1         | 0.248 | 974 CTD.3232M19.  | -0.305 |
| 975 POLA2         | 0.248 | 975 GTF2IRD2B     | -0.307 |
| 976 C1orf109      | 0.248 | 976 RP11.680H20.1 | -0.308 |
| 977 EIF3I         | 0.248 | 977 PLEKHM1       | -0.309 |
| 978 ZNRD1         | 0.248 | 978 PSMB10        | -0.309 |
| 979 HILPDA        | 0.247 | 979 MAPK8IP3      | -0.309 |
| 980 XRN2          | 0.247 | 980 RPL13AP25     | -0.315 |
| 981 RBBP5         | 0.247 | 981 RP11.680G24.4 | -0.316 |
| 982 WRB           | 0.247 | 982 RASA4CP       | -0.319 |
| 983 EXOSC10       | 0.247 | 983 KB.1027C11.4  | -0.321 |
| 984 MRPS30        | 0.247 | 984 CTB.134H23.2  | -0.333 |
| 985 TRMT11        | 0.247 | 985 TAPBPL        | -0.335 |
| 986 CKAP2L        | 0.247 | 986 GNPTG         | -0.336 |
| 987 ATP5H         | 0.247 | 987 RP11.109L13.1 | -0.348 |
| 988 DNAJC9.AS1    | 0.247 | 988 RP11.490O6.2  | -0.351 |
| 989 NAF1          | 0.246 | 989 TRADD         | -0.353 |
| 990 HSPA8         | 0.246 |                   |        |
| 991 MTFR1         | 0.246 |                   |        |
| 992 TFDP2         | 0.246 |                   |        |
| 993 STOML2        | 0.246 |                   |        |
| 994 IDI1          | 0.246 |                   |        |
| 995 UBTD2         | 0.246 |                   |        |
| 996 NARG2         | 0.246 |                   |        |
| 997 COX7B         | 0.246 |                   |        |
| 998 ZFYVE16       | 0.246 |                   |        |
| 999 ARHGAP19      | 0.246 |                   |        |
| 1000 ATAD5        | 0.245 |                   |        |

|                    |       |
|--------------------|-------|
| 1001 UBE2W         | 0.245 |
| 1002 TRMT1L        | 0.245 |
| 1003 FBXO9         | 0.245 |
| 1004 DCLRE1A       | 0.245 |
| 1005 HAUS3         | 0.245 |
| 1006 LSM14A        | 0.245 |
| 1007 RP11.423P10.2 | 0.245 |
| 1008 MRPL44        | 0.245 |
| 1009 CEP55         | 0.245 |
| 1010 HEATR1        | 0.245 |
| 1011 TUBG1         | 0.245 |
| 1012 CUL2          | 0.244 |
| 1013 ZBTB6         | 0.244 |
| 1014 FAM72B        | 0.244 |
| 1015 FANCD2        | 0.244 |
| 1016 CAPRIN1       | 0.244 |
| 1017 DHX40         | 0.244 |
| 1018 CKAP5         | 0.244 |
| 1019 POMP          | 0.244 |
| 1020 UQCR10        | 0.244 |
| 1021 HDAC8         | 0.244 |
| 1022 POLR2H        | 0.243 |
| 1023 POLR1B        | 0.243 |
| 1024 LANCL1        | 0.243 |
| 1025 FH            | 0.243 |
| 1026 PPP1R8        | 0.243 |
| 1027 MYL6B         | 0.243 |
| 1028 GPBP1         | 0.243 |
| 1029 SDHB          | 0.243 |
| 1030 PPT1          | 0.243 |
| 1031 SEC22C        | 0.243 |
| 1032 AAGAB         | 0.243 |
| 1033 NR2C2AP       | 0.242 |
| 1034 POLR2B        | 0.242 |
| 1035 CHRNA5        | 0.242 |
| 1036 ANP32E        | 0.242 |
| 1037 SPC24         | 0.242 |
| 1038 MED27         | 0.242 |
| 1039 SFXN1         | 0.242 |
| 1040 RP5.935K16.1  | 0.242 |
| 1041 MAPK14        | 0.242 |
| 1042 RBL1          | 0.242 |
| 1043 HDAC3         | 0.242 |
| 1044 PSMD8         | 0.242 |
| 1045 CLNS1A        | 0.241 |
| 1046 TMEM38B       | 0.241 |
| 1047 IFT81         | 0.241 |
| 1048 NANP          | 0.241 |



|                    |       |
|--------------------|-------|
| 1049 TSFM          | 0.241 |
| 1050 FAM203A       | 0.241 |
| 1051 FASTKD2       | 0.241 |
| 1052 RPL5          | 0.240 |
| 1053 CDKAL1        | 0.240 |
| 1054 RNF219.AS1    | 0.240 |
| 1055 ALKBH1        | 0.240 |
| 1056 ZNF684        | 0.240 |
| 1057 PDCD2         | 0.240 |
| 1058 RQCD1         | 0.240 |
| 1059 SSRP1         | 0.240 |
| 1060 PHF3          | 0.240 |
| 1061 CCDC167       | 0.240 |
| 1062 RP11.101E13.5 | 0.240 |
| 1063 MAK16         | 0.240 |
| 1064 TADA1         | 0.240 |
| 1065 CDC123        | 0.240 |
| 1066 PIGX          | 0.240 |
| 1067 COPRS         | 0.240 |
| 1068 PRR3          | 0.239 |
| 1069 FAM20B        | 0.239 |
| 1070 FAM173B       | 0.239 |
| 1071 DDHD2         | 0.239 |
| 1072 AK2           | 0.239 |
| 1073 GSTCD         | 0.239 |
| 1074 KAT7          | 0.239 |
| 1075 POLR2G        | 0.239 |
| 1076 TAF8          | 0.239 |
| 1077 MORF4L2       | 0.239 |
| 1078 USP28         | 0.239 |
| 1079 FBXO28        | 0.238 |
| 1080 OAZ2          | 0.238 |
| 1081 MRPL40        | 0.238 |
| 1082 NCBP2.AS1     | 0.238 |
| 1083 TCOF1         | 0.238 |
| 1084 UHRF1BP1L     | 0.238 |
| 1085 TULP3         | 0.238 |
| 1086 RLIM          | 0.238 |
| 1087 CNIH4         | 0.238 |
| 1088 ANKRD40       | 0.238 |
| 1089 RPL29         | 0.238 |
| 1090 THAP5         | 0.238 |
| 1091 DIAPH3        | 0.238 |
| 1092 SNRNP48       | 0.238 |
| 1093 TTC27         | 0.237 |
| 1094 EBNA1BP2      | 0.237 |
| 1095 PRMT3         | 0.237 |
| 1096 ANP32A        | 0.237 |

|                    |       |
|--------------------|-------|
| 1097 SMG8          | 0.237 |
| 1098 GLRX3         | 0.237 |
| 1099 GFM2          | 0.237 |
| 1100 URB2          | 0.237 |
| 1101 ZFR           | 0.237 |
| 1102 NCBP2         | 0.237 |
| 1103 RBX1          | 0.237 |
| 1104 TBC1D15       | 0.237 |
| 1105 RP11.294J22.6 | 0.237 |
| 1106 PPP3CB        | 0.237 |
| 1107 NUDCD2        | 0.237 |
| 1108 C17orf53      | 0.237 |
| 1109 RPL9          | 0.237 |
| 1110 RPL36         | 0.236 |
| 1111 TMEM201       | 0.236 |
| 1112 TNPO1         | 0.236 |
| 1113 MRPS7         | 0.236 |
| 1114 KCTD6         | 0.236 |
| 1115 MTF2          | 0.236 |
| 1116 SIKE1         | 0.236 |
| 1117 NIT2          | 0.236 |
| 1118 HMGCR         | 0.236 |
| 1119 TCEB1         | 0.235 |
| 1120 AGPAT5        | 0.235 |
| 1121 TIMM21        | 0.235 |
| 1122 PDSS1         | 0.235 |
| 1123 OSBPL11       | 0.235 |
| 1124 USMG5         | 0.235 |
| 1125 PHAX          | 0.235 |
| 1126 TTL           | 0.235 |
| 1127 C3orf17       | 0.235 |
| 1128 TRIAP1        | 0.235 |
| 1129 TRAM2.AS1     | 0.235 |
| 1130 ZNF273        | 0.235 |
| 1131 SS18L2        | 0.235 |
| 1132 TROAP         | 0.235 |
| 1133 RPL17         | 0.235 |
| 1134 DCTPP1        | 0.235 |
| 1135 PSMD6         | 0.235 |
| 1136 ZBTB2         | 0.235 |
| 1137 TCF19         | 0.234 |
| 1138 ZNF200        | 0.234 |
| 1139 PPIA          | 0.234 |
| 1140 IARS2         | 0.234 |
| 1141 SF3B5         | 0.234 |
| 1142 GTSE1         | 0.234 |
| 1143 PDS5A         | 0.234 |
| 1144 NVL           | 0.234 |

|                     |       |
|---------------------|-------|
| 1145 MAP3K7         | 0.234 |
| 1146 TAF5L          | 0.234 |
| 1147 RP11.1079K10.  | 0.234 |
| 1148 VDAC1          | 0.234 |
| 1149 RWDD4P2        | 0.234 |
| 1150 MRFAP1         | 0.234 |
| 1151 ZZZ3           | 0.234 |
| 1152 MIR4426        | 0.233 |
| 1153 KB.1608C10.2   | 0.233 |
| 1154 TICRR          | 0.233 |
| 1155 EHMT2          | 0.233 |
| 1156 KIAA0895       | 0.233 |
| 1157 TMEM237        | 0.233 |
| 1158 RP11.603J24.17 | 0.233 |
| 1159 RP1.40E16.11   | 0.233 |
| 1160 CCDC41         | 0.233 |
| 1161 EIF2S2         | 0.233 |
| 1162 ZRANB3         | 0.233 |
| 1163 ABCD3          | 0.233 |
| 1164 CNBP           | 0.233 |
| 1165 WDR61          | 0.233 |
| 1166 HEATR6         | 0.233 |
| 1167 NOLC1          | 0.233 |
| 1168 GTF3C6         | 0.233 |
| 1169 SMYD5          | 0.232 |
| 1170 DDX10          | 0.232 |
| 1171 TCEB3          | 0.232 |
| 1172 MPHOSPH10      | 0.232 |
| 1173 MTCH1          | 0.232 |
| 1174 RPL35          | 0.232 |
| 1175 APEX2          | 0.232 |
| 1176 ZNF92          | 0.232 |
| 1177 MRPL24         | 0.232 |
| 1178 UQCRFS1        | 0.232 |
| 1179 KNTC1          | 0.232 |
| 1180 ARL6IP1        | 0.232 |
| 1181 WRAP53         | 0.232 |
| 1182 CCDC104        | 0.232 |
| 1183 RNF20          | 0.231 |
| 1184 RP11.631M6.2   | 0.231 |
| 1185 POLD3          | 0.231 |
| 1186 CCP110         | 0.231 |
| 1187 ADSS           | 0.231 |
| 1188 SENP1          | 0.231 |
| 1189 NCAPD2         | 0.231 |
| 1190 HDDC2          | 0.231 |
| 1191 HSBP1          | 0.231 |
| 1192 RYK            | 0.231 |

|                   |       |
|-------------------|-------|
| 1193 EIF5B        | 0.230 |
| 1194 MRPL27       | 0.230 |
| 1195 RRP15        | 0.230 |
| 1196 VKORC1L1     | 0.230 |
| 1197 KIAA0196.AS1 | 0.230 |
| 1198 C1D          | 0.230 |
| 1199 PARP2        | 0.230 |
| 1200 TAF2         | 0.230 |
| 1201 WDR70        | 0.230 |
| 1202 ARHGEF39     | 0.230 |
| 1203 TGS1         | 0.230 |
| 1204 STK3         | 0.230 |
| 1205 H2AFV        | 0.229 |
| 1206 KLHL8        | 0.229 |
| 1207 DHX33        | 0.229 |
| 1208 PIN4         | 0.229 |
| 1209 DBT          | 0.229 |
| 1210 C14orf166    | 0.229 |
| 1211 RPL7A        | 0.229 |
| 1212 NOP16        | 0.229 |
| 1213 SEPHS1       | 0.229 |
| 1214 TIMELESS     | 0.229 |
| 1215 AURKB        | 0.229 |
| 1216 VPS72        | 0.229 |
| 1217 CWC22        | 0.229 |
| 1218 KIF22        | 0.228 |
| 1219 SUPV3L1      | 0.228 |
| 1220 YARS2        | 0.228 |
| 1221 C5orf51      | 0.228 |
| 1222 PTPN11       | 0.228 |
| 1223 DLD          | 0.228 |
| 1224 RPL35A       | 0.228 |
| 1225 COA3         | 0.228 |
| 1226 AARS2        | 0.228 |
| 1227 MDC1         | 0.228 |
| 1228 GEMIN4       | 0.228 |
| 1229 PSMD3        | 0.228 |
| 1230 PAK2         | 0.228 |
| 1231 THAP3        | 0.228 |
| 1232 DDX21        | 0.228 |
| 1233 OARD1        | 0.228 |
| 1234 NDUFA5       | 0.228 |
| 1235 ANGEL2       | 0.228 |
| 1236 SLC29A1      | 0.227 |
| 1237 UBA3         | 0.227 |
| 1238 CCSAP        | 0.227 |
| 1239 CAPZA1       | 0.227 |
| 1240 RSBN1        | 0.227 |

|                    |       |
|--------------------|-------|
| 1241 RP11.161H23.9 | 0.227 |
| 1242 PIK3R4        | 0.227 |
| 1243 RP11.973D8.4  | 0.227 |
| 1244 RABEP1        | 0.227 |
| 1245 C17orf104     | 0.227 |
| 1246 DPH3          | 0.227 |
| 1247 SLC25A15      | 0.227 |
| 1248 PRPF38A       | 0.227 |
| 1249 MED4          | 0.226 |
| 1250 MPHOSPH6      | 0.226 |
| 1251 APPBP2        | 0.226 |
| 1252 FUBP3         | 0.226 |
| 1253 CISD2         | 0.226 |
| 1254 TGIF2         | 0.226 |
| 1255 HIBCH         | 0.226 |
| 1256 BOD1          | 0.226 |
| 1257 RP11.95D17.1  | 0.226 |
| 1258 ACOT13        | 0.226 |
| 1259 SMC6          | 0.226 |
| 1260 TTC33         | 0.226 |
| 1261 HN1           | 0.226 |
| 1262 RAD23B        | 0.226 |
| 1263 YWHAZ         | 0.226 |
| 1264 TACC3         | 0.225 |
| 1265 ABCF1         | 0.225 |
| 1266 NRAS          | 0.225 |
| 1267 UPF3B         | 0.225 |
| 1268 PDZD11        | 0.225 |
| 1269 FAM72D        | 0.225 |
| 1270 DDX52         | 0.225 |
| 1271 HAUS8         | 0.225 |
| 1272 TSNAX         | 0.225 |
| 1273 SLC25A32      | 0.225 |
| 1274 TOPORS        | 0.225 |
| 1275 COMMD1        | 0.225 |
| 1276 TPI1          | 0.225 |
| 1277 ZNF138        | 0.224 |
| 1278 POLR3G        | 0.224 |
| 1279 SLC25A3       | 0.224 |
| 1280 PRMT5.AS1     | 0.224 |
| 1281 PSMB5         | 0.224 |
| 1282 HSPH1         | 0.224 |
| 1283 MCM2          | 0.224 |
| 1284 PANK3         | 0.224 |
| 1285 RP3.337H4.9   | 0.224 |
| 1286 FANCM         | 0.224 |
| 1287 METTL14       | 0.224 |
| 1288 SHMT1         | 0.224 |

|                    |       |
|--------------------|-------|
| 1289 TTI1          | 0.224 |
| 1290 RWDD4P1       | 0.224 |
| 1291 PSME3         | 0.224 |
| 1292 USP13         | 0.224 |
| 1293 C1orf52       | 0.223 |
| 1294 RP11.802O23.3 | 0.223 |
| 1295 ATP6V1C1      | 0.223 |
| 1296 GRPEL2        | 0.223 |
| 1297 ITGB1BP1      | 0.223 |
| 1298 RP11.256L6.2  | 0.223 |
| 1299 PTC3          | 0.223 |
| 1300 ARPP19        | 0.223 |
| 1301 WDR43         | 0.223 |
| 1302 COX6A1        | 0.223 |
| 1303 AC091133.1    | 0.223 |
| 1304 POLR2K        | 0.223 |
| 1305 BMPR1A        | 0.223 |
| 1306 PITPNB        | 0.223 |
| 1307 RP1.30M3.5    | 0.223 |
| 1308 TMEM206       | 0.223 |
| 1309 PTBP2         | 0.223 |
| 1310 GTF2E1        | 0.223 |
| 1311 GIN1          | 0.223 |
| 1312 PARP1         | 0.222 |
| 1313 LAS1L         | 0.222 |
| 1314 RBBP9         | 0.222 |
| 1315 MDC1.AS1      | 0.222 |
| 1316 LYAR          | 0.222 |
| 1317 ESPL1         | 0.222 |
| 1318 AC002550.5    | 0.222 |
| 1319 ACER3         | 0.222 |
| 1320 HTATSF1       | 0.222 |
| 1321 UBE3A         | 0.222 |
| 1322 FGD5.AS1      | 0.222 |
| 1323 C18orf54      | 0.222 |
| 1324 ATPAF1        | 0.222 |
| 1325 TROVE2        | 0.222 |
| 1326 BPHL          | 0.222 |
| 1327 CTDSPL2       | 0.222 |
| 1328 FARS2         | 0.222 |
| 1329 ZNF638        | 0.222 |
| 1330 DNAJC9        | 0.222 |
| 1331 MNAT1         | 0.222 |
| 1332 PPIH          | 0.221 |
| 1333 ACP1          | 0.221 |
| 1334 ESD           | 0.221 |
| 1335 ILKAP         | 0.221 |
| 1336 CTC.534A2.2   | 0.221 |

|                   |       |
|-------------------|-------|
| 1337 NLE1         | 0.221 |
| 1338 CCNE1        | 0.221 |
| 1339 GSPT1        | 0.221 |
| 1340 LYRM7        | 0.221 |
| 1341 NMD3         | 0.221 |
| 1342 BOLA2B       | 0.221 |
| 1343 ABCB7        | 0.221 |
| 1344 RP5.886K2.3  | 0.221 |
| 1345 DPH6         | 0.221 |
| 1346 SUB1         | 0.221 |
| 1347 PRKAR2B      | 0.221 |
| 1348 FBL          | 0.221 |
| 1349 RP5.874C20.3 | 0.221 |
| 1350 TMMEM199     | 0.221 |
| 1351 UFSP2        | 0.221 |
| 1352 C11orf73     | 0.220 |
| 1353 ANLN         | 0.220 |
| 1354 SRSF9        | 0.220 |
| 1355 STAU1        | 0.220 |
| 1356 HS2ST1       | 0.220 |
| 1357 SNF8         | 0.220 |
| 1358 ATL2         | 0.220 |
| 1359 NBPF14       | 0.220 |
| 1360 RPL12        | 0.220 |
| 1361 SPAG5.AS1    | 0.220 |
| 1362 NDUFB2.AS1   | 0.220 |
| 1363 PPP2R5E      | 0.220 |
| 1364 EI24         | 0.220 |
| 1365 ARL13B       | 0.220 |
| 1366 ATIC         | 0.219 |
| 1367 AP3M1        | 0.219 |
| 1368 RPAP2        | 0.219 |
| 1369 CCNI         | 0.219 |
| 1370 ADNP2        | 0.219 |
| 1371 CXorf56      | 0.219 |
| 1372 ATP5J2       | 0.219 |
| 1373 MEAF6        | 0.219 |
| 1374 DAP3         | 0.218 |
| 1375 GTF2A1       | 0.218 |
| 1376 PSMD1        | 0.218 |
| 1377 GKAP1        | 0.218 |
| 1378 NAP1L1       | 0.218 |
| 1379 UBE2K        | 0.218 |
| 1380 HNRNPA0      | 0.218 |
| 1381 LINC00094    | 0.218 |
| 1382 INTS7        | 0.218 |
| 1383 NUP160       | 0.218 |
| 1384 DCUN1D5      | 0.218 |

|                    |       |
|--------------------|-------|
| 1385 RP11.98D18.15 | 0.217 |
| 1386 BMS1          | 0.217 |
| 1387 CENPM         | 0.217 |
| 1388 BEND3         | 0.217 |
| 1389 ASUN          | 0.217 |
| 1390 LIN52         | 0.217 |
| 1391 RABEPK        | 0.217 |
| 1392 APPL1         | 0.217 |
| 1393 RFC1          | 0.217 |
| 1394 TBP           | 0.217 |
| 1395 PRKDC         | 0.217 |
| 1396 ACVR2B        | 0.217 |
| 1397 RP11.145M9.4  | 0.217 |
| 1398 CBX2          | 0.217 |
| 1399 PPA1          | 0.217 |
| 1400 NDUFV2        | 0.217 |
| 1401 TAF1A         | 0.217 |
| 1402 CMC2          | 0.217 |
| 1403 MGME1         | 0.216 |
| 1404 USP45         | 0.216 |
| 1405 MICU2         | 0.216 |
| 1406 UBE2S         | 0.216 |
| 1407 CWC27         | 0.216 |
| 1408 MFN1          | 0.216 |
| 1409 KIAA1841      | 0.216 |
| 1410 RLF           | 0.216 |
| 1411 RAD51         | 0.216 |
| 1412 RP11.21J18.1  | 0.216 |
| 1413 HIGD1A        | 0.216 |
| 1414 HSD17B10      | 0.216 |
| 1415 IFT52         | 0.216 |
| 1416 GTF3C3        | 0.216 |
| 1417 TXNDC9        | 0.216 |
| 1418 KCTD20        | 0.216 |
| 1419 CDCA5         | 0.216 |
| 1420 FAF1          | 0.216 |
| 1421 NENF          | 0.215 |
| 1422 ADIPOR2       | 0.215 |
| 1423 CHD1          | 0.215 |
| 1424 TRIM45        | 0.215 |
| 1425 PPP2R2A       | 0.215 |
| 1426 KIF18B        | 0.215 |
| 1427 MIR302B       | 0.215 |
| 1428 NRD1          | 0.215 |
| 1429 RABL3         | 0.215 |
| 1430 AC073641.2    | 0.215 |
| 1431 SAR1A         | 0.215 |
| 1432 FAM178A       | 0.214 |



|                    |       |
|--------------------|-------|
| 1433 STRADB        | 0.214 |
| 1434 FOXM1         | 0.214 |
| 1435 DIABLO        | 0.214 |
| 1436 CPSF2         | 0.214 |
| 1437 RPL14         | 0.214 |
| 1438 RP5.1172N10.4 | 0.214 |
| 1439 RP11.186N15.3 | 0.214 |
| 1440 DKC1          | 0.214 |
| 1441 GPR137C       | 0.214 |
| 1442 RBM14         | 0.214 |
| 1443 RPUSD3        | 0.214 |
| 1444 HSDL2         | 0.213 |
| 1445 TIMMDC1       | 0.213 |
| 1446 RP11.155G14.6 | 0.213 |
| 1447 POLE3         | 0.213 |
| 1448 RFWD3         | 0.213 |
| 1449 SNX27         | 0.213 |
| 1450 NOP10         | 0.213 |
| 1451 FAM118B       | 0.213 |
| 1452 RAC3          | 0.213 |
| 1453 PPM1D         | 0.213 |
| 1454 RBMX2         | 0.213 |
| 1455 SAMD1         | 0.213 |
| 1456 FAM172A       | 0.212 |
| 1457 AC099850.1    | 0.212 |
| 1458 KIF2A         | 0.212 |
| 1459 ARL3          | 0.212 |
| 1460 PRPF4B        | 0.212 |
| 1461 UHRF1         | 0.212 |
| 1462 EEF1A1        | 0.212 |
| 1463 FUS           | 0.212 |
| 1464 ELP4          | 0.212 |
| 1465 PIGA          | 0.212 |
| 1466 NEIL2         | 0.212 |
| 1467 IFT88         | 0.212 |
| 1468 SNAPIN        | 0.212 |
| 1469 RPP14         | 0.212 |
| 1470 RCC1          | 0.211 |
| 1471 FGFR1OP       | 0.211 |
| 1472 TMA16         | 0.211 |
| 1473 ATRIP         | 0.211 |
| 1474 RN7SL2        | 0.211 |
| 1475 IPO9.AS1      | 0.211 |
| 1476 FBXO22        | 0.211 |
| 1477 PHF20         | 0.211 |
| 1478 REPS1         | 0.211 |
| 1479 SLC30A6       | 0.211 |
| 1480 CTD.2008A1.2  | 0.211 |

|                  |       |
|------------------|-------|
| 1481 HINT3       | 0.211 |
| 1482 MRPL2       | 0.211 |
| 1483 RNPS1       | 0.211 |
| 1484 DNAJC19     | 0.211 |
| 1485 C12orf45    | 0.211 |
| 1486 HLTf        | 0.211 |
| 1487 SERF1A      | 0.211 |
| 1488 NOL9        | 0.211 |
| 1489 PANK1       | 0.210 |
| 1490 ZNF131      | 0.210 |
| 1491 MED21       | 0.210 |
| 1492 GNPAT       | 0.210 |
| 1493 EIF4A3      | 0.210 |
| 1494 AZI2        | 0.210 |
| 1495 NME7        | 0.210 |
| 1496 ASPM        | 0.210 |
| 1497 RBM8A       | 0.210 |
| 1498 PPIG        | 0.210 |
| 1499 PA2G4       | 0.210 |
| 1500 NHP2        | 0.210 |
| 1501 CHORDC1     | 0.210 |
| 1502 GDAP2       | 0.210 |
| 1503 MMADHC      | 0.210 |
| 1504 RANBP9      | 0.210 |
| 1505 MTPAP       | 0.210 |
| 1506 PCCB        | 0.210 |
| 1507 ASF1A       | 0.209 |
| 1508 RPL32       | 0.209 |
| 1509 AC006011.4  | 0.209 |
| 1510 STYX        | 0.209 |
| 1511 GNPAT1      | 0.209 |
| 1512 TRAPPC13    | 0.209 |
| 1513 FAM133B     | 0.209 |
| 1514 RPIA        | 0.209 |
| 1515 SEC22A      | 0.209 |
| 1516 FOPNL       | 0.209 |
| 1517 RP5.930J4.4 | 0.209 |
| 1518 TTF2        | 0.209 |
| 1519 CCDC23      | 0.209 |
| 1520 KPNA6       | 0.209 |
| 1521 GLRX2       | 0.209 |
| 1522 RSL1D1      | 0.209 |
| 1523 G3BP2       | 0.209 |
| 1524 NKRF        | 0.209 |
| 1525 VPS54       | 0.208 |
| 1526 METTL18     | 0.208 |
| 1527 PRPSAP2     | 0.208 |
| 1528 CCHCR1      | 0.208 |

|      |               |       |
|------|---------------|-------|
| 1529 | CCDC43        | 0.208 |
| 1530 | PKN2          | 0.208 |
| 1531 | RP11.266K22.2 | 0.208 |
| 1532 | HMGB2         | 0.208 |
| 1533 | ZNF318        | 0.208 |
| 1534 | PDE12         | 0.208 |
| 1535 | RPL10A        | 0.207 |
| 1536 | ZCCHC10       | 0.207 |
| 1537 | GTF2F2        | 0.207 |
| 1538 | RP11.90P5.2   | 0.207 |
| 1539 | AC007620.3    | 0.207 |
| 1540 | FAM96A        | 0.207 |
| 1541 | PWP2          | 0.207 |
| 1542 | APTX          | 0.207 |
| 1543 | INTS2         | 0.207 |
| 1544 | POC1B         | 0.207 |
| 1545 | METTL4        | 0.207 |
| 1546 | PRKAR2A       | 0.207 |
| 1547 | CRIP1         | 0.207 |
| 1548 | ACACA         | 0.207 |
| 1549 | C12orf73      | 0.207 |
| 1550 | SEC61A2       | 0.206 |
| 1551 | PARG          | 0.206 |
| 1552 | ST7L          | 0.206 |
| 1553 | RCHY1         | 0.206 |
| 1554 | DDX1          | 0.206 |
| 1555 | POGK          | 0.206 |
| 1556 | GNPDA1        | 0.206 |
| 1557 | UQCRQ         | 0.206 |
| 1558 | FPGT          | 0.206 |
| 1559 | CUL1          | 0.206 |
| 1560 | SHQ1          | 0.206 |
| 1561 | PARK7         | 0.206 |
| 1562 | DPY30         | 0.206 |
| 1563 | RPL23         | 0.206 |
| 1564 | PAFAH1B2      | 0.206 |
| 1565 | PRUNE         | 0.206 |
| 1566 | POP1          | 0.206 |
| 1567 | COPS8         | 0.206 |
| 1568 | WDR82         | 0.205 |
| 1569 | PSMD13        | 0.205 |
| 1570 | TRUB2         | 0.205 |
| 1571 | MIR4721       | 0.205 |
| 1572 | PTRH2         | 0.205 |
| 1573 | KIF1B         | 0.205 |
| 1574 | AC005740.5    | 0.205 |
| 1575 | NANOS1        | 0.205 |
| 1576 | CDK19         | 0.205 |

|                    |       |
|--------------------|-------|
| 1577 MAML1         | 0.205 |
| 1578 PIP4K2B       | 0.205 |
| 1579 MED31         | 0.205 |
| 1580 ZNF678        | 0.205 |
| 1581 ELK1          | 0.205 |
| 1582 TMEM14A       | 0.205 |
| 1583 MPHOSPH9      | 0.205 |
| 1584 COA1          | 0.205 |
| 1585 SRF           | 0.205 |
| 1586 SUGT1         | 0.204 |
| 1587 DYNC2H1       | 0.204 |
| 1588 C16orf80      | 0.204 |
| 1589 PSMC3IP       | 0.204 |
| 1590 SNAP47        | 0.204 |
| 1591 KB.1043D8.6   | 0.204 |
| 1592 MTMR12        | 0.204 |
| 1593 C6orf57       | 0.204 |
| 1594 UBAC2.AS1     | 0.204 |
| 1595 YRDC          | 0.204 |
| 1596 CDC73         | 0.204 |
| 1597 UBQLN1        | 0.204 |
| 1598 VPS29         | 0.204 |
| 1599 PLK1          | 0.204 |
| 1600 NCAPD3        | 0.204 |
| 1601 UBE2D1        | 0.204 |
| 1602 MAD2L2        | 0.204 |
| 1603 HN1L          | 0.204 |
| 1604 MOCS2         | 0.204 |
| 1605 BORA          | 0.204 |
| 1606 COX6C         | 0.204 |
| 1607 AKAP5         | 0.204 |
| 1608 PBX2          | 0.203 |
| 1609 SLMO2         | 0.203 |
| 1610 NBPF16        | 0.203 |
| 1611 CTD.2636A23.2 | 0.203 |
| 1612 KIF5B         | 0.203 |
| 1613 TCAIM         | 0.203 |
| 1614 RP11.303E16.2 | 0.203 |
| 1615 CSTF1         | 0.203 |
| 1616 AQR           | 0.203 |
| 1617 DCK           | 0.203 |
| 1618 USP37         | 0.203 |
| 1619 C19orf40      | 0.203 |
| 1620 C14orf142     | 0.203 |
| 1621 TIMM9         | 0.203 |
| 1622 C14orf2       | 0.203 |
| 1623 C3orf38       | 0.202 |
| 1624 NTMT1         | 0.202 |

|                    |       |
|--------------------|-------|
| 1625 RP5.1136G13.2 | 0.202 |
| 1626 NFYB          | 0.202 |
| 1627 NAA35         | 0.202 |
| 1628 TPR           | 0.202 |
| 1629 TERF1         | 0.202 |
| 1630 NUTF2         | 0.202 |
| 1631 SNRPD2        | 0.202 |
| 1632 TSR1          | 0.202 |
| 1633 PTC2          | 0.202 |
| 1634 SNX2          | 0.202 |
| 1635 DDX3X         | 0.202 |
| 1636 SMARCE1       | 0.201 |
| 1637 CRNKL1        | 0.201 |
| 1638 RP11.299J3.8  | 0.201 |
| 1639 KIAA1958      | 0.201 |
| 1640 CRBN          | 0.201 |
| 1641 AL132780.1    | 0.201 |
| 1642 TRIM33        | 0.201 |
| 1643 NELFCD        | 0.201 |
| 1644 RFK           | 0.201 |
| 1645 DOCK7         | 0.201 |
| 1646 EIF4A1        | 0.201 |
| 1647 LRRC42        | 0.201 |
| 1648 FAM162A       | 0.201 |
| 1649 USP16         | 0.201 |
| 1650 NSMCE2        | 0.201 |
| 1651 MED28         | 0.201 |
| 1652 RP11.97O12.7  | 0.200 |
| 1653 FAM45A        | 0.200 |
| 1654 MTIF2         | 0.200 |
| 1655 NUCKS1        | 0.200 |
| 1656 E2F1          | 0.200 |
| 1657 NDUFB11       | 0.200 |
| 1658 SPIN1         | 0.200 |
| 1659 RTF1          | 0.200 |
| 1660 CETN2         | 0.200 |
| 1661 FGD1          | 0.200 |
| 1662 YES1          | 0.200 |
| 1663 ALDH9A1       | 0.200 |
| 1664 OGFOD1        | 0.200 |
| 1665 SNX12         | 0.200 |
| 1666 TXLNG         | 0.200 |
| 1667 PHTF2         | 0.200 |
| 1668 FAM229B       | 0.200 |
| 1669 MRPS36        | 0.199 |
| 1670 NARS2         | 0.199 |
| 1671 DYNLL1        | 0.199 |
| 1672 DNAL1         | 0.199 |

|                    |       |
|--------------------|-------|
| 1673 AC004257.3    | 0.199 |
| 1674 TMEM69        | 0.199 |
| 1675 ADH5          | 0.199 |
| 1676 TCFL5         | 0.199 |
| 1677 RP11.592B15.4 | 0.199 |
| 1678 TDP2          | 0.199 |
| 1679 TTF1          | 0.199 |
| 1680 ZUFSP         | 0.199 |
| 1681 EXOC6         | 0.199 |
| 1682 ABI2          | 0.198 |
| 1683 EIF1B         | 0.198 |
| 1684 QSER1         | 0.198 |
| 1685 RP4.657D16.3  | 0.198 |
| 1686 GPD1L         | 0.198 |
| 1687 NIP7          | 0.198 |
| 1688 RPE           | 0.198 |
| 1689 ADO           | 0.198 |
| 1690 USP32         | 0.198 |
| 1691 AMZ2          | 0.198 |
| 1692 RP11.804A23.4 | 0.198 |
| 1693 ATP5C1        | 0.198 |
| 1694 NEIL3         | 0.198 |
| 1695 PRPSAP1       | 0.197 |
| 1696 PDHB          | 0.197 |
| 1697 ARL2          | 0.197 |
| 1698 DUS4L         | 0.197 |
| 1699 MRPL9         | 0.197 |
| 1700 ZNF510        | 0.197 |
| 1701 EID2          | 0.197 |
| 1702 EZH2          | 0.197 |
| 1703 NUP50         | 0.197 |
| 1704 FAM103A1      | 0.197 |
| 1705 AC083799.1    | 0.197 |
| 1706 PSMD4         | 0.197 |
| 1707 TBK1          | 0.197 |
| 1708 HJURP         | 0.196 |
| 1709 LSM1          | 0.196 |
| 1710 THRAP3        | 0.196 |
| 1711 TUBA1C        | 0.196 |
| 1712 ANAPC1        | 0.196 |
| 1713 SUCLA2        | 0.196 |
| 1714 KIAA1731      | 0.196 |
| 1715 VWA9          | 0.196 |
| 1716 MAPK8         | 0.196 |
| 1717 PHF10         | 0.196 |
| 1718 EXOC5         | 0.196 |
| 1719 BTRC          | 0.196 |
| 1720 RPS6KC1       | 0.196 |

|                   |       |
|-------------------|-------|
| 1721 B3GALTL      | 0.196 |
| 1722 SMAD5        | 0.196 |
| 1723 DARS         | 0.196 |
| 1724 ZNF507       | 0.196 |
| 1725 TCEANC2      | 0.196 |
| 1726 ARL5B        | 0.196 |
| 1727 TMA7         | 0.196 |
| 1728 VPS45        | 0.196 |
| 1729 MMT1         | 0.196 |
| 1730 RP1.228H13.5 | 0.196 |
| 1731 RP11.589M4.1 | 0.196 |
| 1732 ZMYM3        | 0.195 |
| 1733 CEP97        | 0.195 |
| 1734 MED14        | 0.195 |
| 1735 CMC1         | 0.195 |
| 1736 OTUD6B       | 0.195 |
| 1737 UBP1         | 0.195 |
| 1738 UFD1L        | 0.195 |
| 1739 AP3M2        | 0.195 |
| 1740 ABCA11P      | 0.195 |
| 1741 PDS5B        | 0.195 |
| 1742 VPS35        | 0.195 |
| 1743 WDR47        | 0.195 |
| 1744 SRP72        | 0.195 |
| 1745 EIF3M        | 0.195 |
| 1746 ALKBH2       | 0.195 |
| 1747 NUDT5        | 0.195 |
| 1748 C17orf96     | 0.195 |
| 1749 EFCAB11      | 0.195 |
| 1750 CFL2         | 0.194 |
| 1751 MIR4519      | 0.194 |
| 1752 ZNF124       | 0.194 |
| 1753 IMMP1L       | 0.194 |
| 1754 ASF1B        | 0.194 |
| 1755 TRNT1        | 0.194 |
| 1756 RPRD1A       | 0.194 |
| 1757 NDUFA4       | 0.194 |
| 1758 AF196970.3   | 0.194 |
| 1759 SORD         | 0.194 |
| 1760 DPY19L4      | 0.194 |
| 1761 ZNF286B      | 0.194 |
| 1762 ENO1P4       | 0.194 |
| 1763 TRAPPC3      | 0.194 |
| 1764 EIF3H        | 0.194 |
| 1765 WDR33        | 0.193 |
| 1766 FAM217B      | 0.193 |
| 1767 PACRGL       | 0.193 |
| 1768 TMEM209      | 0.193 |

|                    |       |
|--------------------|-------|
| 1769 PEBP1         | 0.193 |
| 1770 AHSA1         | 0.193 |
| 1771 CDK5RAP2      | 0.193 |
| 1772 CTNNAL1       | 0.193 |
| 1773 NDUFAF7       | 0.193 |
| 1774 RPL35P5       | 0.193 |
| 1775 RPL18A        | 0.193 |
| 1776 PROSC         | 0.193 |
| 1777 BTF3          | 0.193 |
| 1778 STAMBP        | 0.193 |
| 1779 RRP9          | 0.193 |
| 1780 SPOP          | 0.193 |
| 1781 ACADSB        | 0.193 |
| 1782 ZNF16         | 0.193 |
| 1783 UBE2F         | 0.193 |
| 1784 C9orf40       | 0.193 |
| 1785 ZNF691        | 0.193 |
| 1786 GGPS1         | 0.193 |
| 1787 TTC7B         | 0.193 |
| 1788 CLASP2        | 0.192 |
| 1789 C18orf21      | 0.192 |
| 1790 UBR7          | 0.192 |
| 1791 FAM169A       | 0.192 |
| 1792 RB1CC1        | 0.192 |
| 1793 RPL27         | 0.192 |
| 1794 FDPS          | 0.192 |
| 1795 EED           | 0.192 |
| 1796 ZNF721        | 0.192 |
| 1797 NACA          | 0.192 |
| 1798 MAPK1IP1L     | 0.192 |
| 1799 ZBTB33        | 0.192 |
| 1800 FAM60A        | 0.192 |
| 1801 TRMT6         | 0.192 |
| 1802 FMR1          | 0.192 |
| 1803 SYNJ2BP.COX   | 0.192 |
| 1804 CCNG1         | 0.191 |
| 1805 TP53RK        | 0.191 |
| 1806 CRLF3         | 0.191 |
| 1807 GPR89A        | 0.191 |
| 1808 YME1L1        | 0.191 |
| 1809 PRKRIR        | 0.191 |
| 1810 C6orf203      | 0.191 |
| 1811 ABHD10        | 0.191 |
| 1812 TYW3          | 0.191 |
| 1813 AGTPBP1       | 0.191 |
| 1814 CCDC86        | 0.191 |
| 1815 RP11.343N15.5 | 0.191 |
| 1816 MCM7          | 0.191 |



|                    |       |
|--------------------|-------|
| 1817 CENPP         | 0.191 |
| 1818 METAP1        | 0.191 |
| 1819 USP5          | 0.191 |
| 1820 RP11.872D17.4 | 0.191 |
| 1821 HNRNPL        | 0.191 |
| 1822 UBAP2L        | 0.191 |
| 1823 PAXBP1        | 0.191 |
| 1824 EIF2S3        | 0.190 |
| 1825 KLHL15        | 0.190 |
| 1826 RP11.545I5.3  | 0.190 |
| 1827 RBM28         | 0.190 |
| 1828 SDCCAG3       | 0.190 |
| 1829 BUB3          | 0.190 |
| 1830 PHOSPHO2      | 0.190 |
| 1831 KIAA1467      | 0.190 |
| 1832 OLA1P1        | 0.190 |
| 1833 GTF2H2C       | 0.190 |
| 1834 FAM72A        | 0.190 |
| 1835 ICT1          | 0.190 |
| 1836 TIMM10        | 0.190 |
| 1837 ALYREF        | 0.189 |
| 1838 ZFP69B        | 0.189 |
| 1839 ACLY          | 0.189 |
| 1840 BTBD9         | 0.189 |
| 1841 GMEB1         | 0.189 |
| 1842 LAMTOR5       | 0.189 |
| 1843 RP11.216B9.6  | 0.189 |
| 1844 TDRKH         | 0.189 |
| 1845 NBPF1         | 0.189 |
| 1846 PRPF19        | 0.189 |
| 1847 DEGS1         | 0.189 |
| 1848 ZFAND3        | 0.189 |
| 1849 XPO4          | 0.189 |
| 1850 BCKDHB        | 0.189 |
| 1851 PSMG2         | 0.189 |
| 1852 CNIH1         | 0.189 |
| 1853 EXTL2         | 0.189 |
| 1854 QRSL1         | 0.189 |
| 1855 MFF           | 0.189 |
| 1856 RP3.469D22.1  | 0.189 |
| 1857 PRMT5         | 0.189 |
| 1858 BTG3          | 0.189 |
| 1859 BRCC3         | 0.189 |
| 1860 MED6          | 0.189 |
| 1861 RAB28         | 0.189 |
| 1862 SDHD          | 0.189 |
| 1863 ABCF2         | 0.189 |
| 1864 BBS7          | 0.189 |

|                    |       |
|--------------------|-------|
| 1865 MANEA         | 0.189 |
| 1866 TRIM23        | 0.189 |
| 1867 C8orf33       | 0.188 |
| 1868 CHRAC1        | 0.188 |
| 1869 RPS17L        | 0.188 |
| 1870 FAM8A1        | 0.188 |
| 1871 UCK2          | 0.188 |
| 1872 SFR1          | 0.188 |
| 1873 RP13.131K19.1 | 0.188 |
| 1874 CREM          | 0.188 |
| 1875 RPL26L1       | 0.188 |
| 1876 POLQ          | 0.188 |
| 1877 GCAT          | 0.188 |
| 1878 RP11.452F19.3 | 0.188 |
| 1879 IDI2.AS1      | 0.188 |
| 1880 RAD17         | 0.188 |
| 1881 NDUFAB1       | 0.188 |
| 1882 39142.00      | 0.188 |
| 1883 ROCK1P1       | 0.188 |
| 1884 DPH3P1        | 0.188 |
| 1885 TADA2A        | 0.188 |
| 1886 TXNDC16       | 0.188 |
| 1887 ZNF664        | 0.188 |
| 1888 MED1          | 0.188 |
| 1889 ECI2          | 0.188 |
| 1890 AMZ2P1        | 0.188 |
| 1891 FXN           | 0.188 |
| 1892 CHML          | 0.188 |
| 1893 PDCD5         | 0.188 |
| 1894 RP11.613M10.6 | 0.187 |
| 1895 MRPS2         | 0.187 |
| 1896 CACUL1        | 0.187 |
| 1897 GALNT11       | 0.187 |
| 1898 METTL5        | 0.187 |
| 1899 ZC3H14        | 0.187 |
| 1900 ACTR3B        | 0.187 |
| 1901 HSPA9         | 0.187 |
| 1902 IKBKAP        | 0.187 |
| 1903 C16orf59      | 0.187 |
| 1904 SAP130        | 0.187 |
| 1905 NDUFS3        | 0.187 |
| 1906 ZNF189        | 0.187 |
| 1907 WDSUB1        | 0.187 |
| 1908 STRN          | 0.187 |
| 1909 RP11.388M20.6 | 0.187 |
| 1910 USP46         | 0.187 |
| 1911 SRRD          | 0.187 |
| 1912 RPL11         | 0.187 |

|               |       |
|---------------|-------|
| 1913 IREB2    | 0.187 |
| 1914 SP3      | 0.187 |
| 1915 YAE1D1   | 0.187 |
| 1916 CPNE3    | 0.187 |
| 1917 MAST1    | 0.186 |
| 1918 MYNN     | 0.186 |
| 1919 U2AF1    | 0.186 |
| 1920 PSMC2    | 0.186 |
| 1921 TAB2     | 0.186 |
| 1922 TWISTNB  | 0.186 |
| 1923 SMARCAD1 | 0.186 |
| 1924 QRIC1    | 0.186 |
| 1925 ASTE1    | 0.186 |
| 1926 PARS2    | 0.186 |
| 1927 NPAT     | 0.186 |
| 1928 SLC30A9  | 0.186 |
| 1929 PXMP2    | 0.186 |
| 1930 PAXIP1   | 0.186 |
| 1931 PHIP     | 0.186 |
| 1932 POLR2F   | 0.186 |
| 1933 PDHA1    | 0.186 |
| 1934 FLVCR1   | 0.186 |
| 1935 MRPS31   | 0.186 |
| 1936 SMC1A    | 0.186 |
| 1937 GABPB1   | 0.186 |
| 1938 RAB11A   | 0.185 |
| 1939 TMEM68   | 0.185 |
| 1940 TAF13    | 0.185 |
| 1941 EIF2A    | 0.185 |
| 1942 EXOC2    | 0.185 |
| 1943 EME1     | 0.185 |
| 1944 ATP5B    | 0.185 |
| 1945 SPDL1    | 0.185 |
| 1946 PPHLN1   | 0.185 |
| 1947 ENSA     | 0.185 |
| 1948 GDPD1    | 0.185 |
| 1949 KIAA1430 | 0.185 |
| 1950 SUV39H1  | 0.185 |
| 1951 LRRC8B   | 0.185 |
| 1952 TMEM70   | 0.185 |
| 1953 KTN1.AS1 | 0.185 |
| 1954 DCTN6    | 0.185 |
| 1955 COPG2    | 0.185 |
| 1956 AIFM1    | 0.185 |
| 1957 GNRHR2P1 | 0.185 |
| 1958 SEPNI    | 0.184 |
| 1959 PPP2R1B  | 0.184 |
| 1960 DTD2     | 0.184 |

|                    |       |
|--------------------|-------|
| 1961 CASC3         | 0.184 |
| 1962 EFCAB7        | 0.184 |
| 1963 DCP2          | 0.184 |
| 1964 HMGB1P5       | 0.184 |
| 1965 THOC7         | 0.184 |
| 1966 DHX15         | 0.184 |
| 1967 CISD1         | 0.184 |
| 1968 CMTR1         | 0.184 |
| 1969 RP11.20B24.4  | 0.184 |
| 1970 DLAT          | 0.183 |
| 1971 KIAA0020      | 0.183 |
| 1972 CLTC          | 0.183 |
| 1973 SOD1          | 0.183 |
| 1974 CSNK1G3       | 0.183 |
| 1975 C12orf65      | 0.183 |
| 1976 PRKRA         | 0.183 |
| 1977 AIMP1         | 0.183 |
| 1978 CEP70         | 0.183 |
| 1979 RP11.452H21.1 | 0.183 |
| 1980 UBE2D2        | 0.183 |
| 1981 RAF1          | 0.183 |
| 1982 RP11.365O16.6 | 0.183 |
| 1983 METTL8        | 0.183 |
| 1984 TRDMT1        | 0.183 |
| 1985 RNF144A       | 0.183 |
| 1986 LATS1         | 0.183 |
| 1987 LSM4          | 0.183 |
| 1988 CIT           | 0.183 |
| 1989 CDK12         | 0.183 |
| 1990 MRPS16        | 0.183 |
| 1991 NFIB          | 0.183 |
| 1992 PUF60         | 0.183 |
| 1993 AC144449.1    | 0.182 |
| 1994 PREP          | 0.182 |
| 1995 CGRRF1        | 0.182 |
| 1996 FNBP1L        | 0.182 |
| 1997 VAMP7         | 0.182 |
| 1998 KARS          | 0.182 |
| 1999 ACTR2         | 0.182 |
| 2000 DBF4B         | 0.182 |
| 2001 PPIAP11       | 0.182 |
| 2002 RNF11         | 0.182 |
| 2003 FBXW11        | 0.182 |
| 2004 STRA13        | 0.182 |
| 2005 SP4           | 0.182 |
| 2006 AGBL5         | 0.182 |
| 2007 YTHDC2        | 0.182 |
| 2008 MIS18BP1      | 0.182 |

|                    |       |
|--------------------|-------|
| 2009 SCYL2         | 0.182 |
| 2010 MRE11A        | 0.182 |
| 2011 AP000320.7    | 0.182 |
| 2012 ABCB10        | 0.181 |
| 2013 C10orf88      | 0.181 |
| 2014 METTL9        | 0.181 |
| 2015 FAM216A       | 0.181 |
| 2016 POLDIP2       | 0.181 |
| 2017 RP11.1094M14. | 0.181 |
| 2018 SLC25A19      | 0.181 |
| 2019 FAM200A       | 0.181 |
| 2020 CRK           | 0.181 |
| 2021 TDG           | 0.181 |
| 2022 CBY1          | 0.181 |
| 2023 KIAA1009      | 0.181 |
| 2024 ZBTB26        | 0.181 |
| 2025 NBPF20        | 0.181 |
| 2026 SF3B3         | 0.181 |
| 2027 OSBPL8        | 0.181 |
| 2028 LSM6          | 0.181 |
| 2029 MSL1          | 0.181 |
| 2030 C3orf33       | 0.181 |
| 2031 SLC25A11      | 0.181 |
| 2032 RP11.773H22.4 | 0.181 |
| 2033 MTX1          | 0.181 |
| 2034 TK1           | 0.181 |
| 2035 LTA4H         | 0.181 |
| 2036 SLC5A6        | 0.181 |
| 2037 YBX1          | 0.181 |
| 2038 SERAC1        | 0.181 |
| 2039 MED30         | 0.181 |
| 2040 PLCG1         | 0.180 |
| 2041 NUP98         | 0.180 |
| 2042 UBLCP1        | 0.180 |
| 2043 KLHL12        | 0.180 |
| 2044 RP11.315I20.1 | 0.180 |
| 2045 KIAA0947      | 0.180 |
| 2046 PSMA6         | 0.180 |
| 2047 CTD.2026K11.2 | 0.180 |
| 2048 RCL1          | 0.180 |
| 2049 NPM3          | 0.180 |
| 2050 NDUFA12       | 0.180 |
| 2051 THAP9         | 0.180 |
| 2052 MRPL36        | 0.180 |
| 2053 THOC3         | 0.180 |
| 2054 NDUFA9        | 0.180 |
| 2055 HNRNPF        | 0.180 |
| 2056 RALA          | 0.180 |

|                    |       |
|--------------------|-------|
| 2057 INTS9         | 0.180 |
| 2058 RP11.316M1.12 | 0.180 |
| 2059 SFPQ          | 0.180 |
| 2060 Sep-07        | 0.179 |
| 2061 TCERG1        | 0.179 |
| 2062 XRCC6BP1      | 0.179 |
| 2063 LLPH          | 0.179 |
| 2064 DUSP12        | 0.179 |
| 2065 PSMD10        | 0.179 |
| 2066 FRS2          | 0.179 |
| 2067 RAC1          | 0.179 |
| 2068 SF3B4         | 0.179 |
| 2069 LMBR1         | 0.179 |
| 2070 PAPOLG        | 0.179 |
| 2071 PHF16         | 0.179 |
| 2072 UBXLN7        | 0.179 |
| 2073 MIS12         | 0.179 |
| 2074 FUT10         | 0.179 |
| 2075 TOMM40        | 0.179 |
| 2076 SLC25A30      | 0.179 |
| 2077 ACOT7         | 0.178 |
| 2078 FAM53C        | 0.178 |
| 2079 UBL7.AS1      | 0.178 |
| 2080 TMEM67        | 0.178 |
| 2081 RTCA          | 0.178 |
| 2082 TIMM50        | 0.178 |
| 2083 NT5C3B        | 0.178 |
| 2084 RPS28         | 0.178 |
| 2085 TTC1          | 0.178 |
| 2086 GRSF1         | 0.178 |
| 2087 GPALPP1       | 0.178 |
| 2088 ERCC6L2       | 0.178 |
| 2089 SNW1          | 0.178 |
| 2090 RNFT1         | 0.177 |
| 2091 IPO8          | 0.177 |
| 2092 AFG3L2        | 0.177 |
| 2093 AC109828.1    | 0.177 |
| 2094 HCCS          | 0.177 |
| 2095 DTNBP1        | 0.177 |
| 2096 LARS2         | 0.177 |
| 2097 FIGNL1        | 0.177 |
| 2098 PSMA7         | 0.177 |
| 2099 UBL7          | 0.177 |
| 2100 ERCC3         | 0.177 |
| 2101 CCNF          | 0.177 |
| 2102 RWDD3         | 0.177 |
| 2103 TPMT          | 0.177 |
| 2104 DTNB          | 0.177 |

|                    |       |
|--------------------|-------|
| 2105 LMNB2         | 0.177 |
| 2106 SLC25A5.AS1   | 0.177 |
| 2107 PCM1          | 0.177 |
| 2108 LPHN1         | 0.177 |
| 2109 BRK1          | 0.176 |
| 2110 RPS2          | 0.176 |
| 2111 DNAJC2        | 0.176 |
| 2112 MERTK         | 0.176 |
| 2113 SUPT3H        | 0.176 |
| 2114 UBQLN4        | 0.176 |
| 2115 STAU2         | 0.176 |
| 2116 AP2B1         | 0.176 |
| 2117 HMGCS1        | 0.176 |
| 2118 UBA1          | 0.176 |
| 2119 CNOT11        | 0.176 |
| 2120 PIK3R3        | 0.176 |
| 2121 WDR36         | 0.176 |
| 2122 RP13.638C3.4  | 0.176 |
| 2123 DR1           | 0.176 |
| 2124 C1orf174      | 0.176 |
| 2125 NHP2L1        | 0.176 |
| 2126 BNIP1         | 0.176 |
| 2127 KBTBD7        | 0.176 |
| 2128 FAM175A       | 0.176 |
| 2129 ERLIN1        | 0.176 |
| 2130 AKIRIN1       | 0.176 |
| 2131 NDUFAF2       | 0.176 |
| 2132 ATP5G2        | 0.176 |
| 2133 NRM           | 0.176 |
| 2134 RP11.1033A18. | 0.175 |
| 2135 DTWD2         | 0.175 |
| 2136 C5orf54       | 0.175 |
| 2137 KIAA1279      | 0.175 |
| 2138 MRPL17        | 0.175 |
| 2139 TRIM52.AS1    | 0.175 |
| 2140 ACTR10        | 0.175 |
| 2141 C1orf216      | 0.175 |
| 2142 HNRNPDL       | 0.175 |
| 2143 WRN           | 0.175 |
| 2144 PLEKHA8       | 0.175 |
| 2145 VARS          | 0.175 |
| 2146 CLP1          | 0.175 |
| 2147 HEATR2        | 0.175 |
| 2148 PMPCB         | 0.175 |
| 2149 CWC15         | 0.175 |
| 2150 MYBL2         | 0.175 |
| 2151 CHD1L         | 0.175 |
| 2152 CUTA          | 0.175 |

|                    |       |
|--------------------|-------|
| 2153 SUCLG1        | 0.174 |
| 2154 NSDHL         | 0.174 |
| 2155 FAM200B       | 0.174 |
| 2156 RMDN1         | 0.174 |
| 2157 ODF2          | 0.174 |
| 2158 VPS52         | 0.174 |
| 2159 MTFMT         | 0.174 |
| 2160 TAOK1         | 0.174 |
| 2161 COQ7          | 0.174 |
| 2162 POP7          | 0.174 |
| 2163 WEE1          | 0.174 |
| 2164 PFDN1         | 0.174 |
| 2165 SMCHD1        | 0.174 |
| 2166 RP11.61A14.3  | 0.174 |
| 2167 KM.PA.2       | 0.174 |
| 2168 ADNP          | 0.174 |
| 2169 NOP56         | 0.174 |
| 2170 SCLT1         | 0.174 |
| 2171 BRD3          | 0.174 |
| 2172 MAPT          | 0.173 |
| 2173 ANP32B        | 0.173 |
| 2174 CNIH2         | 0.173 |
| 2175 TACO1         | 0.173 |
| 2176 XXYLT1        | 0.173 |
| 2177 AC010127.5    | 0.173 |
| 2178 RP11.231C14.3 | 0.173 |
| 2179 LONRF1        | 0.173 |
| 2180 HMGB3         | 0.173 |
| 2181 ILF3          | 0.173 |
| 2182 GPANK1        | 0.173 |
| 2183 GDAP1         | 0.173 |
| 2184 TSEN34        | 0.173 |
| 2185 PPP2R3C       | 0.173 |
| 2186 ALG10         | 0.173 |
| 2187 CEP192        | 0.173 |
| 2188 EMC2          | 0.173 |
| 2189 FAM204A       | 0.172 |
| 2190 FAM92A1       | 0.172 |
| 2191 VPS25         | 0.172 |
| 2192 RP11.282O18.3 | 0.172 |
| 2193 AASDH         | 0.172 |
| 2194 BUD31         | 0.172 |
| 2195 PLRG1         | 0.172 |
| 2196 CDK5          | 0.172 |
| 2197 BRCA2         | 0.172 |
| 2198 VAPB          | 0.172 |
| 2199 NUDC          | 0.172 |
| 2200 ARPC3         | 0.172 |



|                   |       |
|-------------------|-------|
| 2201 MKS1         | 0.172 |
| 2202 DBI          | 0.172 |
| 2203 RNFT2        | 0.172 |
| 2204 MRPL21       | 0.172 |
| 2205 RP11.253M7.1 | 0.172 |
| 2206 PGBD1        | 0.172 |
| 2207 PSMC4        | 0.172 |
| 2208 MKLN1        | 0.172 |
| 2209 PHB2         | 0.172 |
| 2210 TOP2B        | 0.171 |
| 2211 RBM12B       | 0.171 |
| 2212 PARL         | 0.171 |
| 2213 BCL7C        | 0.171 |
| 2214 CEP85        | 0.171 |
| 2215 ARPC1A       | 0.171 |
| 2216 DHODH        | 0.171 |
| 2217 TOE1         | 0.171 |
| 2218 DYNC112      | 0.171 |
| 2219 POLE         | 0.171 |
| 2220 RPS4X        | 0.171 |
| 2221 TTI2         | 0.171 |
| 2222 NDUFB9       | 0.171 |
| 2223 NBN          | 0.171 |
| 2224 CEP135       | 0.171 |
| 2225 R3HDM1       | 0.171 |
| 2226 MBLAC2       | 0.171 |
| 2227 ITSN1        | 0.171 |
| 2228 RP11.889L3.1 | 0.171 |
| 2229 Sep-02       | 0.171 |
| 2230 PALB2        | 0.170 |
| 2231 E2F5         | 0.170 |
| 2232 ZNF322       | 0.170 |
| 2233 COX16        | 0.170 |
| 2234 MIER3        | 0.170 |
| 2235 PBRM1        | 0.170 |
| 2236 NQO2         | 0.170 |
| 2237 STRBP        | 0.170 |
| 2238 STAG2        | 0.170 |
| 2239 PMPCA        | 0.170 |
| 2240 GTF3C2       | 0.170 |
| 2241 BTBD1        | 0.170 |
| 2242 HACL1        | 0.170 |
| 2243 MYEOV2       | 0.170 |
| 2244 EIF3L        | 0.170 |
| 2245 SYAP1        | 0.170 |
| 2246 TARS         | 0.170 |
| 2247 AL358781.1   | 0.169 |
| 2248 SETP14       | 0.169 |

|      |              |       |
|------|--------------|-------|
| 2249 | NXT1         | 0.169 |
| 2250 | FAM175B      | 0.169 |
| 2251 | AL139819.1   | 0.169 |
| 2252 | ASIC1        | 0.169 |
| 2253 | CCAR1        | 0.169 |
| 2254 | NDUFB3       | 0.169 |
| 2255 | C11orf58     | 0.169 |
| 2256 | TMTC3        | 0.169 |
| 2257 | PDCD2L       | 0.169 |
| 2258 | MCM5         | 0.169 |
| 2259 | ENTPD1.AS1   | 0.169 |
| 2260 | ATP5L        | 0.169 |
| 2261 | WASF1        | 0.169 |
| 2262 | MRPL48       | 0.169 |
| 2263 | PGGT1B       | 0.169 |
| 2264 | TMEM126B     | 0.169 |
| 2265 | RP11.815I9.4 | 0.169 |
| 2266 | GFM1         | 0.169 |
| 2267 | TCEA1        | 0.168 |
| 2268 | RNMTL1       | 0.168 |
| 2269 | LRRC20       | 0.168 |
| 2270 | FOXK2        | 0.168 |
| 2271 | AC004381.6   | 0.168 |
| 2272 | SEC23IP      | 0.168 |
| 2273 | NDUFB2       | 0.168 |
| 2274 | CIAPIN1      | 0.168 |
| 2275 | MRPL33       | 0.168 |
| 2276 | ING2         | 0.168 |
| 2277 | CHAF1A       | 0.168 |
| 2278 | LSM14B       | 0.168 |
| 2279 | PPA2         | 0.168 |
| 2280 | RP11.391M1.4 | 0.168 |
| 2281 | POC5         | 0.168 |
| 2282 | CCDC25       | 0.168 |
| 2283 | AGO1         | 0.168 |
| 2284 | HIPK1        | 0.168 |
| 2285 | MPLKIP       | 0.168 |
| 2286 | LBR          | 0.168 |
| 2287 | SLC39A10     | 0.167 |
| 2288 | CHCHD6       | 0.167 |
| 2289 | TRMT112      | 0.167 |
| 2290 | BDP1         | 0.167 |
| 2291 | HCG25        | 0.167 |
| 2292 | SNX14        | 0.167 |
| 2293 | PIGP         | 0.167 |
| 2294 | C6orf106     | 0.167 |
| 2295 | MRPS35       | 0.167 |
| 2296 | PINX1        | 0.167 |

|                     |       |
|---------------------|-------|
| 2297 MDM1           | 0.167 |
| 2298 SRRM1          | 0.167 |
| 2299 FOXRED2        | 0.167 |
| 2300 RFWD2          | 0.167 |
| 2301 RSRC1          | 0.167 |
| 2302 IQCB1          | 0.167 |
| 2303 USP10          | 0.167 |
| 2304 APOA1BP        | 0.167 |
| 2305 IMPDH2         | 0.167 |
| 2306 WASH5P         | 0.167 |
| 2307 FAM189B        | 0.167 |
| 2308 RMI2           | 0.167 |
| 2309 RWDD2A         | 0.166 |
| 2310 TRIM24         | 0.166 |
| 2311 SLC25A14       | 0.166 |
| 2312 TSEN2          | 0.166 |
| 2313 TMEM242        | 0.166 |
| 2314 RP11.603J24.14 | 0.166 |
| 2315 THOC5          | 0.166 |
| 2316 NDUFAF6        | 0.166 |
| 2317 NDUFS5         | 0.166 |
| 2318 DLEU1          | 0.166 |
| 2319 FAM210B        | 0.166 |
| 2320 PRKCI          | 0.166 |
| 2321 ZNF107         | 0.166 |
| 2322 FOXP4          | 0.166 |
| 2323 AC002117.1     | 0.166 |
| 2324 ISCA2          | 0.166 |
| 2325 COMMD4         | 0.166 |
| 2326 WBP4           | 0.166 |
| 2327 GLOD4          | 0.166 |
| 2328 PUS3           | 0.165 |
| 2329 DENND5A        | 0.165 |
| 2330 MTA3           | 0.165 |
| 2331 C7orf73        | 0.165 |
| 2332 FASTKD5        | 0.165 |
| 2333 ERGIC2         | 0.165 |
| 2334 ZMYND19        | 0.165 |
| 2335 UBXN2B         | 0.165 |
| 2336 HSPA4L         | 0.165 |
| 2337 EIF3J          | 0.165 |
| 2338 SDAD1          | 0.165 |
| 2339 NDUFS1         | 0.165 |
| 2340 SUZ12P         | 0.165 |
| 2341 COMMD10        | 0.165 |
| 2342 TWF1           | 0.165 |
| 2343 KPNA1          | 0.165 |
| 2344 MAGI3          | 0.165 |

|                    |       |
|--------------------|-------|
| 2345 GPATCH2       | 0.165 |
| 2346 SMEK2         | 0.164 |
| 2347 METTL21A      | 0.164 |
| 2348 HOMER1        | 0.164 |
| 2349 NFYA          | 0.164 |
| 2350 WRAP73        | 0.164 |
| 2351 RP11.180C16.1 | 0.164 |
| 2352 DCUN1D4       | 0.164 |
| 2353 TOP1          | 0.164 |
| 2354 JAGN1         | 0.164 |
| 2355 PGK1          | 0.164 |
| 2356 C2CD5         | 0.164 |
| 2357 VAPA          | 0.164 |
| 2358 BUD13         | 0.164 |
| 2359 DHX35         | 0.164 |
| 2360 ASH2L         | 0.164 |
| 2361 RC3H2         | 0.164 |
| 2362 FAHD2B        | 0.164 |
| 2363 FKTN          | 0.164 |
| 2364 BAZ1B         | 0.164 |
| 2365 UBIAD1        | 0.164 |
| 2366 ALKBH8        | 0.164 |
| 2367 KB.431C1.4    | 0.163 |
| 2368 C11orf84      | 0.163 |
| 2369 LYSMD1        | 0.163 |
| 2370 TNPO3         | 0.163 |
| 2371 TXNL1         | 0.163 |
| 2372 SREK1IP1      | 0.163 |
| 2373 NCAPH2        | 0.163 |
| 2374 UBXN8         | 0.163 |
| 2375 AHCYL1        | 0.163 |
| 2376 C4orf21       | 0.163 |
| 2377 XPR1          | 0.163 |
| 2378 CCDC47        | 0.163 |
| 2379 GTF2B         | 0.163 |
| 2380 RAB1F         | 0.163 |
| 2381 TMEM167A      | 0.163 |
| 2382 TSEN15        | 0.163 |
| 2383 PGRMC1        | 0.163 |
| 2384 CCDC15        | 0.163 |
| 2385 ZNF584        | 0.163 |
| 2386 EARS2         | 0.163 |
| 2387 ATF1          | 0.163 |
| 2388 BBS4          | 0.163 |
| 2389 CTNNA1        | 0.163 |
| 2390 TOR1AIP1      | 0.162 |
| 2391 NDUFAF5       | 0.162 |
| 2392 RPS24         | 0.162 |

|                   |       |
|-------------------|-------|
| 2393 STXBP3       | 0.162 |
| 2394 HEATR3       | 0.162 |
| 2395 SNX16        | 0.162 |
| 2396 CRKL         | 0.162 |
| 2397 NGDN         | 0.162 |
| 2398 ACADM        | 0.162 |
| 2399 NTAN1        | 0.162 |
| 2400 ANKRD46      | 0.162 |
| 2401 RNF14        | 0.162 |
| 2402 EPB41L5      | 0.162 |
| 2403 DHX30        | 0.162 |
| 2404 NSA2         | 0.162 |
| 2405 C11orf30     | 0.162 |
| 2406 ZNF37A       | 0.162 |
| 2407 CPSF6        | 0.162 |
| 2408 ARL1         | 0.161 |
| 2409 KDM1B        | 0.161 |
| 2410 RP3.508I15.9 | 0.161 |
| 2411 PET117       | 0.161 |
| 2412 TTLL4        | 0.161 |
| 2413 KIAA1715     | 0.161 |
| 2414 AC016773.1   | 0.161 |
| 2415 CBWD1        | 0.161 |
| 2416 SAP18        | 0.161 |
| 2417 RPL12P1      | 0.161 |
| 2418 LCLAT1       | 0.161 |
| 2419 APIP         | 0.161 |
| 2420 CDK5R1       | 0.161 |
| 2421 WAPAL        | 0.161 |
| 2422 SOAT1        | 0.161 |
| 2423 RP11.423H2.1 | 0.161 |
| 2424 SFXN4        | 0.161 |
| 2425 CFDP1        | 0.161 |
| 2426 TUBGCP4      | 0.161 |
| 2427 FIG4         | 0.161 |
| 2428 RBM17        | 0.160 |
| 2429 INIP         | 0.160 |
| 2430 RPL23AP79    | 0.160 |
| 2431 FAM208B      | 0.160 |
| 2432 GLE1         | 0.160 |
| 2433 RFXAP        | 0.160 |
| 2434 CDCA4        | 0.160 |
| 2435 PTBP1        | 0.160 |
| 2436 C17orf75     | 0.160 |
| 2437 FAM199X      | 0.160 |
| 2438 PFAS         | 0.160 |
| 2439 THAP9.AS1    | 0.160 |
| 2440 OSGIN2       | 0.160 |

|                    |       |
|--------------------|-------|
| 2441 TMEM50B       | 0.160 |
| 2442 IBTK          | 0.160 |
| 2443 UTP14A        | 0.160 |
| 2444 BCORL1        | 0.160 |
| 2445 UBE2E1        | 0.160 |
| 2446 CBWD3         | 0.159 |
| 2447 MIB1          | 0.159 |
| 2448 ZNHIT6        | 0.159 |
| 2449 MARCKSL1      | 0.159 |
| 2450 ADK           | 0.159 |
| 2451 DROSHA        | 0.159 |
| 2452 AL357673.1    | 0.159 |
| 2453 ANKRD26       | 0.159 |
| 2454 RPS18P9       | 0.159 |
| 2455 EPT1          | 0.159 |
| 2456 CRLS1         | 0.159 |
| 2457 MCPH1         | 0.159 |
| 2458 COX15         | 0.159 |
| 2459 GPM6B         | 0.159 |
| 2460 ZNF436        | 0.159 |
| 2461 ZBTB24        | 0.159 |
| 2462 SNRNP25       | 0.159 |
| 2463 RAP1A         | 0.159 |
| 2464 XXbac.BPG181  | 0.159 |
| 2465 TRNAU1AP      | 0.159 |
| 2466 CAD           | 0.159 |
| 2467 SNX6          | 0.159 |
| 2468 RP11.316M21.6 | 0.158 |
| 2469 MRPL46        | 0.158 |
| 2470 COA4          | 0.158 |
| 2471 TMX1          | 0.158 |
| 2472 NT5DC1        | 0.158 |
| 2473 ANKRD39       | 0.158 |
| 2474 SEMA4F        | 0.158 |
| 2475 MEX3D         | 0.158 |
| 2476 PGM2          | 0.158 |
| 2477 PSMD2         | 0.158 |
| 2478 LIG3          | 0.158 |
| 2479 GPATCH11      | 0.158 |
| 2480 C12orf60      | 0.158 |
| 2481 MCTS1         | 0.158 |
| 2482 CYB5B         | 0.158 |
| 2483 CHUK          | 0.158 |
| 2484 HADHB         | 0.158 |
| 2485 TOMM34        | 0.158 |
| 2486 MKKS          | 0.158 |
| 2487 OTUD3         | 0.158 |
| 2488 LSM11         | 0.158 |

|                    |       |
|--------------------|-------|
| 2489 ATXN10        | 0.158 |
| 2490 CDK16         | 0.158 |
| 2491 EIF4H         | 0.157 |
| 2492 SMPD4         | 0.157 |
| 2493 STX6          | 0.157 |
| 2494 KREMEN1       | 0.157 |
| 2495 RPL41         | 0.157 |
| 2496 ELMOD2        | 0.157 |
| 2497 NDUFB8        | 0.157 |
| 2498 C19orf12      | 0.157 |
| 2499 AC009005.2    | 0.157 |
| 2500 RBM3          | 0.157 |
| 2501 UAP1          | 0.157 |
| 2502 SWT1          | 0.157 |
| 2503 PFN2          | 0.157 |
| 2504 GAPDHP1       | 0.157 |
| 2505 TRAF3IP2.AS1  | 0.157 |
| 2506 KCNIP4        | 0.157 |
| 2507 THUMPD1       | 0.157 |
| 2508 RPS6KA5       | 0.157 |
| 2509 AAR2          | 0.157 |
| 2510 RP11.27I1.4   | 0.157 |
| 2511 SENP2         | 0.157 |
| 2512 AC010976.2    | 0.157 |
| 2513 GID4          | 0.157 |
| 2514 PRKAG1        | 0.157 |
| 2515 PPP6R3        | 0.157 |
| 2516 RPS15A        | 0.156 |
| 2517 PIK3CB        | 0.156 |
| 2518 BLOC1S2       | 0.156 |
| 2519 CEP170        | 0.156 |
| 2520 RP11.977G19.1 | 0.156 |
| 2521 TMEM170A      | 0.156 |
| 2522 ZHX1          | 0.156 |
| 2523 DCP1A         | 0.156 |
| 2524 POMGNT2       | 0.156 |
| 2525 IDE           | 0.156 |
| 2526 N6AMT1        | 0.156 |
| 2527 COPS6         | 0.156 |
| 2528 SLC25A40      | 0.156 |
| 2529 RAB18         | 0.156 |
| 2530 PPM1G         | 0.156 |
| 2531 SLC25A5       | 0.156 |
| 2532 FARP2         | 0.156 |
| 2533 KIAA0586      | 0.156 |
| 2534 SRP14         | 0.156 |
| 2535 WDFY1         | 0.156 |
| 2536 RINT1         | 0.156 |

|                   |       |
|-------------------|-------|
| 2537 CEP44        | 0.156 |
| 2538 ATP7B        | 0.155 |
| 2539 DHTKD1       | 0.155 |
| 2540 RP1.152L7.5  | 0.155 |
| 2541 ALDH1B1      | 0.155 |
| 2542 ZNF250       | 0.155 |
| 2543 IQCC         | 0.155 |
| 2544 MTMR4        | 0.155 |
| 2545 DIXDC1       | 0.155 |
| 2546 KHSRP        | 0.155 |
| 2547 CTC.524C5.2  | 0.155 |
| 2548 CTC.366B18.2 | 0.155 |
| 2549 CCDC18       | 0.155 |
| 2550 FBXO30       | 0.155 |
| 2551 UBR2         | 0.155 |
| 2552 ZNF565       | 0.155 |
| 2553 PES1         | 0.155 |
| 2554 NABP2        | 0.154 |
| 2555 PPWD1        | 0.154 |
| 2556 GPAM         | 0.154 |
| 2557 CEP19        | 0.154 |
| 2558 ARIH2        | 0.154 |
| 2559 LRRC57       | 0.154 |
| 2560 BCAP29       | 0.154 |
| 2561 PSMC5        | 0.154 |
| 2562 VCP          | 0.154 |
| 2563 EPRS         | 0.154 |
| 2564 PHACTR4      | 0.154 |
| 2565 TPGS2        | 0.154 |
| 2566 PRDX1        | 0.154 |
| 2567 CLPX         | 0.154 |
| 2568 PDHX         | 0.154 |
| 2569 XRCC4        | 0.154 |
| 2570 CIRH1A       | 0.154 |
| 2571 EIF4G2       | 0.154 |
| 2572 TXNL4A       | 0.154 |
| 2573 RABL5        | 0.154 |
| 2574 PSPH         | 0.154 |
| 2575 PPIP5K2      | 0.154 |
| 2576 RPS27A       | 0.153 |
| 2577 INCENP       | 0.153 |
| 2578 PGAM1        | 0.153 |
| 2579 MTR          | 0.153 |
| 2580 ZNF45        | 0.153 |
| 2581 GTF2IP1      | 0.153 |
| 2582 KLHL7        | 0.153 |
| 2583 HNRNPU.AS1   | 0.153 |
| 2584 RHEB         | 0.153 |



|                    |       |
|--------------------|-------|
| 2585 FAM222A       | 0.153 |
| 2586 EAF1.AS1      | 0.153 |
| 2587 CTB.96E2.3    | 0.153 |
| 2588 TATDN3        | 0.153 |
| 2589 IQCH          | 0.153 |
| 2590 RBBP8         | 0.153 |
| 2591 RHEBL1        | 0.153 |
| 2592 ESCO1         | 0.153 |
| 2593 ELOF1         | 0.153 |
| 2594 CMPK1         | 0.153 |
| 2595 TDP1          | 0.153 |
| 2596 NSMCE4A       | 0.153 |
| 2597 RRP7A         | 0.153 |
| 2598 ZNF207        | 0.153 |
| 2599 SMARCD1       | 0.153 |
| 2600 TRAPPC11      | 0.153 |
| 2601 RHOA          | 0.152 |
| 2602 ZNF714        | 0.152 |
| 2603 COX20         | 0.152 |
| 2604 KDM3B         | 0.152 |
| 2605 RTTN          | 0.152 |
| 2606 FAM206A       | 0.152 |
| 2607 MIER1         | 0.152 |
| 2608 SGTA          | 0.152 |
| 2609 DDB1          | 0.152 |
| 2610 RXRB          | 0.152 |
| 2611 SFMBT1        | 0.152 |
| 2612 RP11.517B11.7 | 0.152 |
| 2613 LEO1          | 0.152 |
| 2614 SMC5          | 0.152 |
| 2615 MRP63         | 0.152 |
| 2616 CRY1          | 0.152 |
| 2617 AKR7A2        | 0.152 |
| 2618 GPX4          | 0.152 |
| 2619 TDRD3         | 0.152 |
| 2620 CDON          | 0.152 |
| 2621 FTSJ2         | 0.152 |
| 2622 DNAAF2        | 0.152 |
| 2623 MTMR2         | 0.152 |
| 2624 YY1           | 0.152 |
| 2625 RAB7L1        | 0.152 |
| 2626 EXOSC5        | 0.152 |
| 2627 FECH          | 0.151 |
| 2628 AC034193.5    | 0.151 |
| 2629 PHYH          | 0.151 |
| 2630 COX5B         | 0.151 |
| 2631 CHTOP         | 0.151 |
| 2632 IARS          | 0.151 |

|                    |       |
|--------------------|-------|
| 2633 KIF3A         | 0.151 |
| 2634 ZNF148        | 0.151 |
| 2635 AC006547.8    | 0.151 |
| 2636 COMMD5        | 0.151 |
| 2637 COX7C         | 0.151 |
| 2638 ICK           | 0.151 |
| 2639 SLC35B4       | 0.151 |
| 2640 HIAT1         | 0.151 |
| 2641 RANBP2        | 0.151 |
| 2642 ACTR1A        | 0.151 |
| 2643 IP6K1         | 0.151 |
| 2644 PTS           | 0.150 |
| 2645 TAMM41        | 0.150 |
| 2646 IPP           | 0.150 |
| 2647 TOP3A         | 0.150 |
| 2648 DCAF16        | 0.150 |
| 2649 RPL38         | 0.150 |
| 2650 PSMC3         | 0.150 |
| 2651 TP53BP2       | 0.150 |
| 2652 MIOS          | 0.150 |
| 2653 RAD51B        | 0.150 |
| 2654 TUBA1A        | 0.150 |
| 2655 TBC1D7        | 0.150 |
| 2656 EEF1A1P4      | 0.150 |
| 2657 LARP7         | 0.150 |
| 2658 HAX1          | 0.150 |
| 2659 GTPBP10       | 0.150 |
| 2660 RPS25         | 0.150 |
| 2661 RSL24D1       | 0.150 |
| 2662 RP11.864J10.4 | 0.150 |
| 2663 ANKHD1        | 0.150 |
| 2664 ZFX           | 0.150 |
| 2665 FKBP5         | 0.150 |
| 2666 RBM22         | 0.150 |
| 2667 RPL9P25       | 0.149 |
| 2668 HNRNPH1       | 0.149 |
| 2669 SAP30BP       | 0.149 |
| 2670 NOC2L         | 0.149 |
| 2671 GPN1          | 0.149 |
| 2672 DUSP11        | 0.149 |
| 2673 COQ2          | 0.149 |
| 2674 TMEM14C       | 0.149 |
| 2675 SLC30A5       | 0.149 |
| 2676 TMEM60        | 0.149 |
| 2677 HADHA         | 0.149 |
| 2678 AEBP2         | 0.149 |
| 2679 FUNDC1        | 0.149 |
| 2680 RP11.126K1.8  | 0.149 |

|                    |       |
|--------------------|-------|
| 2681 MRPS14        | 0.149 |
| 2682 COPS5         | 0.149 |
| 2683 FOXN2         | 0.149 |
| 2684 CSRNP2        | 0.149 |
| 2685 RMND5A        | 0.149 |
| 2686 RP3.467N11.1  | 0.149 |
| 2687 DHRS13        | 0.149 |
| 2688 SACS          | 0.149 |
| 2689 SHPRH         | 0.149 |
| 2690 RP11.580I16.2 | 0.149 |
| 2691 PHF23         | 0.149 |
| 2692 COPZ1         | 0.149 |
| 2693 CTC.453G23.5  | 0.149 |
| 2694 TRMU          | 0.149 |
| 2695 PEF1          | 0.149 |
| 2696 FAM115A       | 0.149 |
| 2697 C19orf48      | 0.149 |
| 2698 RNF216P1      | 0.149 |
| 2699 SC5D          | 0.149 |
| 2700 RP11.575L7.8  | 0.149 |
| 2701 XXbac.BPGBPC  | 0.149 |
| 2702 MFAP3         | 0.149 |
| 2703 MED4.AS1      | 0.149 |
| 2704 HIP1          | 0.148 |
| 2705 RP11.24C3.2   | 0.148 |
| 2706 C6orf47       | 0.148 |
| 2707 RGS10         | 0.148 |
| 2708 CDKL3         | 0.148 |
| 2709 CCDC66        | 0.148 |
| 2710 RP5.1024G6.2  | 0.148 |
| 2711 SFXN2         | 0.148 |
| 2712 LIN54         | 0.148 |
| 2713 ZCCHC4        | 0.148 |
| 2714 E2F2          | 0.148 |
| 2715 FAM102B       | 0.148 |
| 2716 PTK2          | 0.148 |
| 2717 TIMM13        | 0.148 |
| 2718 PTP4A2        | 0.148 |
| 2719 DBF4P1        | 0.148 |
| 2720 SIM2          | 0.148 |
| 2721 TBCD          | 0.148 |
| 2722 EVI5          | 0.148 |
| 2723 STARD7        | 0.148 |
| 2724 CUL4B         | 0.147 |
| 2725 USP21         | 0.147 |
| 2726 PLGRKT        | 0.147 |
| 2727 RP11.649A18.1 | 0.147 |
| 2728 ASNA1         | 0.147 |

|                    |       |
|--------------------|-------|
| 2729 PRMT10        | 0.147 |
| 2730 NDUFS4        | 0.147 |
| 2731 HADH          | 0.147 |
| 2732 RAB14         | 0.147 |
| 2733 PHF14         | 0.147 |
| 2734 LEPROTL1      | 0.147 |
| 2735 CHPT1         | 0.147 |
| 2736 ZSCAN21       | 0.147 |
| 2737 EIF3CL        | 0.147 |
| 2738 TUBB6         | 0.147 |
| 2739 CYB5R4        | 0.147 |
| 2740 RP11.229P13.2 | 0.147 |
| 2741 KPTN          | 0.147 |
| 2742 APLP1         | 0.147 |
| 2743 PUM2          | 0.147 |
| 2744 AAMP          | 0.147 |
| 2745 RSBN1L        | 0.147 |
| 2746 IL17D         | 0.147 |
| 2747 RP11.362K14.5 | 0.147 |
| 2748 TCTN3         | 0.146 |
| 2749 RP5.837J1.2   | 0.146 |
| 2750 ALG8          | 0.146 |
| 2751 SCD           | 0.146 |
| 2752 AC108488.3    | 0.146 |
| 2753 BZW2          | 0.146 |
| 2754 ST6GALNAC6    | 0.146 |
| 2755 DHRS11        | 0.146 |
| 2756 MTMR9         | 0.146 |
| 2757 EWSR1         | 0.146 |
| 2758 CEP57         | 0.146 |
| 2759 POLR3K        | 0.146 |
| 2760 SHCBP1        | 0.146 |
| 2761 MRPS11        | 0.146 |
| 2762 FUNDC2        | 0.146 |
| 2763 PKN3          | 0.146 |
| 2764 EIF4EBP1      | 0.146 |
| 2765 DAG1          | 0.145 |
| 2766 THYN1         | 0.145 |
| 2767 C22orf39      | 0.145 |
| 2768 GMCL1         | 0.145 |
| 2769 ZNF689        | 0.145 |
| 2770 FUBP1         | 0.145 |
| 2771 RP11.697E2.7  | 0.145 |
| 2772 PIGC          | 0.145 |
| 2773 DSTYK         | 0.145 |
| 2774 WHSC1         | 0.145 |
| 2775 RNMT          | 0.145 |
| 2776 DVL2          | 0.145 |

|                  |       |
|------------------|-------|
| 2777 STAM        | 0.145 |
| 2778 GUF1        | 0.145 |
| 2779 ANAPC4      | 0.145 |
| 2780 FAM69B      | 0.145 |
| 2781 C1orf43     | 0.145 |
| 2782 PDCL        | 0.145 |
| 2783 EIF2B4      | 0.145 |
| 2784 RPL19       | 0.145 |
| 2785 FAM117B     | 0.145 |
| 2786 NRF1        | 0.145 |
| 2787 ZNF12       | 0.145 |
| 2788 FYTTD1      | 0.145 |
| 2789 CDK5RAP1    | 0.145 |
| 2790 UBAC1       | 0.144 |
| 2791 SMAD9       | 0.144 |
| 2792 COG2        | 0.144 |
| 2793 INPP5F      | 0.144 |
| 2794 ATP6V0E2    | 0.144 |
| 2795 WDR26       | 0.144 |
| 2796 CECR5       | 0.144 |
| 2797 CASC7       | 0.144 |
| 2798 MRPS33      | 0.144 |
| 2799 VPRBP       | 0.144 |
| 2800 POLR3B      | 0.144 |
| 2801 RBFOX2      | 0.144 |
| 2802 POLR1A      | 0.144 |
| 2803 FAM114A2    | 0.144 |
| 2804 MYH10       | 0.144 |
| 2805 RP4.622L5.2 | 0.144 |
| 2806 TRAK2       | 0.144 |
| 2807 TMEM81      | 0.144 |
| 2808 TYRO3       | 0.144 |
| 2809 POLR2C      | 0.144 |
| 2810 GNA13       | 0.143 |
| 2811 ZNF281      | 0.143 |
| 2812 Sep-10      | 0.143 |
| 2813 PPP2R4      | 0.143 |
| 2814 DYNLT1      | 0.143 |
| 2815 CSRP2BP     | 0.143 |
| 2816 LTN1        | 0.143 |
| 2817 TRIT1       | 0.143 |
| 2818 USP48       | 0.143 |
| 2819 THOC2       | 0.143 |
| 2820 CHAMP1      | 0.143 |
| 2821 APEX1       | 0.143 |
| 2822 PSME4       | 0.143 |
| 2823 FAM86A      | 0.143 |
| 2824 DNAJB5      | 0.143 |

|                  |       |
|------------------|-------|
| 2825 BPNT1       | 0.143 |
| 2826 RPL37A      | 0.143 |
| 2827 SCAI        | 0.143 |
| 2828 PTP4A1      | 0.143 |
| 2829 TTC28.AS1   | 0.143 |
| 2830 ZNF614      | 0.143 |
| 2831 ZNF555      | 0.143 |
| 2832 LIN7C       | 0.142 |
| 2833 UBE2A       | 0.142 |
| 2834 SQLE        | 0.142 |
| 2835 SNX17       | 0.142 |
| 2836 SNUPN       | 0.142 |
| 2837 KLHL18      | 0.142 |
| 2838 C14orf119   | 0.142 |
| 2839 LIAS        | 0.142 |
| 2840 PRKACA      | 0.142 |
| 2841 TBCCD1      | 0.142 |
| 2842 HINT1       | 0.142 |
| 2843 CRHR1       | 0.142 |
| 2844 MAPKAP1     | 0.142 |
| 2845 NBPf24      | 0.142 |
| 2846 NADK2       | 0.142 |
| 2847 TRAPPC2     | 0.142 |
| 2848 FNTA        | 0.142 |
| 2849 CEP72       | 0.142 |
| 2850 SAP30       | 0.142 |
| 2851 CTC.462L7.1 | 0.142 |
| 2852 CCNT1       | 0.142 |
| 2853 MRPL54      | 0.142 |
| 2854 SMIM15      | 0.142 |
| 2855 CDK8        | 0.141 |
| 2856 SNRPA       | 0.141 |
| 2857 OXSM        | 0.141 |
| 2858 BRI3BP      | 0.141 |
| 2859 ZNF24       | 0.141 |
| 2860 MRPS6       | 0.141 |
| 2861 GSK3A       | 0.141 |
| 2862 H3F3AP4     | 0.141 |
| 2863 USP11       | 0.141 |
| 2864 PHTF1       | 0.141 |
| 2865 PMF1        | 0.141 |
| 2866 ZC3H10      | 0.141 |
| 2867 SUFU        | 0.141 |
| 2868 TUBB2A      | 0.141 |
| 2869 YTHDF3      | 0.141 |
| 2870 USP9X       | 0.141 |
| 2871 DUT         | 0.141 |
| 2872 ZNF749      | 0.141 |

|                    |       |
|--------------------|-------|
| 2873 ARL8B         | 0.141 |
| 2874 OIP5.AS1      | 0.141 |
| 2875 NME6          | 0.141 |
| 2876 ICA1L         | 0.141 |
| 2877 CTC.498J12.3  | 0.140 |
| 2878 QKI           | 0.140 |
| 2879 RP1.317E23.7  | 0.140 |
| 2880 CAPZA2        | 0.140 |
| 2881 LINC00493     | 0.140 |
| 2882 ZNF106        | 0.140 |
| 2883 CCNB1IP1      | 0.140 |
| 2884 THADA         | 0.140 |
| 2885 DYNC2LI1      | 0.140 |
| 2886 EIF3D         | 0.140 |
| 2887 ZMAT5         | 0.140 |
| 2888 CTD.2555O16.4 | 0.140 |
| 2889 TRAF3IP1      | 0.140 |
| 2890 DDX55         | 0.140 |
| 2891 MSANTD3       | 0.140 |
| 2892 CLCC1         | 0.140 |
| 2893 NUDT2         | 0.140 |
| 2894 IMPA1         | 0.140 |
| 2895 CDT1          | 0.140 |
| 2896 ELF2          | 0.140 |
| 2897 SLC6A8        | 0.140 |
| 2898 ENTPD1        | 0.140 |
| 2899 CAMSAP1       | 0.140 |
| 2900 PPP2R1A       | 0.140 |
| 2901 ASAP1         | 0.140 |
| 2902 RP11.359B12.2 | 0.139 |
| 2903 TMED5         | 0.139 |
| 2904 PARD6B        | 0.139 |
| 2905 SCAMP1        | 0.139 |
| 2906 CCDC112       | 0.139 |
| 2907 RUVBL2        | 0.139 |
| 2908 MTX2          | 0.139 |
| 2909 MAGEF1        | 0.139 |
| 2910 FN3K          | 0.139 |
| 2911 CCZ1          | 0.139 |
| 2912 SCCPDH        | 0.139 |
| 2913 NSUN2         | 0.139 |
| 2914 TMEM241       | 0.139 |
| 2915 RPS8          | 0.139 |
| 2916 CXADR         | 0.139 |
| 2917 COX6B1        | 0.139 |
| 2918 IWS1          | 0.139 |
| 2919 RBPJ          | 0.139 |
| 2920 CYC1          | 0.139 |

|                    |       |
|--------------------|-------|
| 2921 PPP2R3A       | 0.139 |
| 2922 CCDC126       | 0.139 |
| 2923 RP13.131K19.2 | 0.139 |
| 2924 C12orf52      | 0.139 |
| 2925 CCDC109B      | 0.139 |
| 2926 CCDC6         | 0.138 |
| 2927 MPP5          | 0.138 |
| 2928 FBXO21        | 0.138 |
| 2929 RPL26         | 0.138 |
| 2930 RPRD1B        | 0.138 |
| 2931 FAM120B       | 0.138 |
| 2932 HDGFRP3       | 0.138 |
| 2933 NPEPPS        | 0.138 |
| 2934 BCL2L12       | 0.138 |
| 2935 RPAIN         | 0.138 |
| 2936 CC2D2A        | 0.138 |
| 2937 TFB1M         | 0.138 |
| 2938 Sep-05        | 0.138 |
| 2939 NFYC          | 0.138 |
| 2940 POLR3A        | 0.138 |
| 2941 PDCD10        | 0.138 |
| 2942 FAM222B       | 0.138 |
| 2943 PPT2          | 0.138 |
| 2944 RGPD5         | 0.138 |
| 2945 GNB2L1        | 0.138 |
| 2946 RSAD1         | 0.138 |
| 2947 RTCB          | 0.138 |
| 2948 UBQLN2        | 0.138 |
| 2949 CGGBP1        | 0.138 |
| 2950 ZNF445        | 0.138 |
| 2951 FASN          | 0.138 |
| 2952 RFT1          | 0.138 |
| 2953 NLGN2         | 0.138 |
| 2954 INTS10        | 0.138 |
| 2955 TEX2          | 0.138 |
| 2956 C10orf2       | 0.138 |
| 2957 TM2D2         | 0.138 |
| 2958 C2orf49       | 0.137 |
| 2959 CAMLG         | 0.137 |
| 2960 PIGU          | 0.137 |
| 2961 PPP1R11       | 0.137 |
| 2962 CNP           | 0.137 |
| 2963 PDCD6IP       | 0.137 |
| 2964 AHI1          | 0.137 |
| 2965 SLAIN2        | 0.137 |
| 2966 CTD.2517M22.  | 0.137 |
| 2967 FAM208A       | 0.137 |
| 2968 CTD.2323K18.1 | 0.137 |



|                 |       |
|-----------------|-------|
| 2969 SCP2       | 0.137 |
| 2970 CIAO1      | 0.137 |
| 2971 BCL9       | 0.137 |
| 2972 C7orf60    | 0.137 |
| 2973 MED22      | 0.137 |
| 2974 TMED8      | 0.137 |
| 2975 PRPS2      | 0.137 |
| 2976 SENP3      | 0.137 |
| 2977 UQCRB      | 0.137 |
| 2978 ARV1       | 0.137 |
| 2979 EIF4EBP2   | 0.137 |
| 2980 MPI        | 0.137 |
| 2981 ACYP1      | 0.137 |
| 2982 SF3A1      | 0.137 |
| 2983 STX8       | 0.137 |
| 2984 FAM35DP    | 0.137 |
| 2985 HSDL1      | 0.136 |
| 2986 IVNS1ABP   | 0.136 |
| 2987 DNMT1      | 0.136 |
| 2988 PEX1       | 0.136 |
| 2989 SKI        | 0.136 |
| 2990 ACPL2      | 0.136 |
| 2991 ZCCHC9     | 0.136 |
| 2992 FAM168A    | 0.136 |
| 2993 TMEM181    | 0.136 |
| 2994 FGFR4      | 0.136 |
| 2995 RPS6       | 0.136 |
| 2996 TTC5       | 0.136 |
| 2997 SETD9      | 0.136 |
| 2998 RPS20      | 0.136 |
| 2999 MCM9       | 0.136 |
| 3000 PTMA       | 0.136 |
| 3001 DDX6       | 0.136 |
| 3002 MMAB       | 0.136 |
| 3003 MAPK8IP1   | 0.136 |
| 3004 TIMM22     | 0.136 |
| 3005 TMTC4      | 0.136 |
| 3006 RIMS3      | 0.136 |
| 3007 AC040173.1 | 0.136 |
| 3008 NFS1       | 0.136 |
| 3009 ZFP90      | 0.136 |
| 3010 CINP       | 0.135 |
| 3011 RECQL4     | 0.135 |
| 3012 NBPF3      | 0.135 |
| 3013 CMTM4      | 0.135 |
| 3014 GTF2H1     | 0.135 |
| 3015 SCAF8      | 0.135 |
| 3016 ANKRD13C   | 0.135 |

|                  |       |
|------------------|-------|
| 3017 RAB12       | 0.135 |
| 3018 PRDX4       | 0.135 |
| 3019 ATG12       | 0.135 |
| 3020 MBTPS2      | 0.135 |
| 3021 MIEN1       | 0.135 |
| 3022 TAF15       | 0.135 |
| 3023 TBRG4       | 0.135 |
| 3024 LCORL       | 0.135 |
| 3025 RPS3        | 0.135 |
| 3026 RP11.2E11.9 | 0.135 |
| 3027 DZIP3       | 0.135 |
| 3028 NUDT1       | 0.134 |
| 3029 KATNAL1     | 0.134 |
| 3030 RECQL       | 0.134 |
| 3031 POLD2       | 0.134 |
| 3032 MAGED2      | 0.134 |

---
